# Supplementary material
Source: PubMed Central journal article supplement (PMC7657617)
Supplement: AEM.01674-20-s0001.pdf [file AEM.01674-20-s0001.pdf]

## SUPPORTING INFORMATION

Improved virus isoelectric point estimation by prediction and exclusion of genome-binding regions

Joe Heffron & Brooke K. Mayer

Department of Civil, Construction and Environmental Engineering

Marquette University

1637 W. Wisconsin Ave.

Milwaukee, WI 53233

## S1. Polynucleotide-binding region predictions

Polynucleotide-binding regions (PBRs) were predicted based on conserved structures (arginine-rich regions, beta sheets, beta turns and disordered termini), as well as via two previously existing XNA-binding prediction tools, Pprint and DRNApred. The predictions were trained and validated using separate sets of proteins containing known PBRs, as detailed in Sections S4.1 and S4.2. The Matthews Correlation Coefficients (MCCs) were calculated for each protein as a means of evaluating the prediction. The distributions of MCCs for all prediction are summarized in Table S1. Based on these results, the combination of ARG rich regions and Beta turns was selected as the best overall PBR prediction method.

Table S1: Predictive power of structure-based and existing (Pprint and DRNApred) methods for predicting polynucleotide-binding regions (PBRs) in training (n = 36 PBRs, 25 proteins) and validation (n = 57 PBRs, 40 proteins) sets of virus capsid proteins. An ‘x’ indicates that the structure was included in the overall prediction, which may combine predictions from multiple structures. The row in yellow indicates best overall prediction.

| Predicted Structures | ARG rich | Beta sheets | Beta turns | Disordered termini                | Matthews Correlation Coefficient (MCC) |            |
|----------------------|----------|-------------|------------|-----------------------------------|----------------------------------------|------------|
|                      |          |             |            |                                   | Training                               | Validation |
|                      |          |             |            |                                   | x                                      |            |
|                      | x        |             |            | $0.05 \pm 0.23$                   | $0.06 \pm 0.13$                        |            |
|                      |          | x           |            | $0.07 \pm 0.20$                   | $-0.01 \pm 0.11$                       |            |
|                      |          |             | x          | $0.16 \pm 0.31$                   | $0.11 \pm 0.39$                        |            |
| x                    | x        |             |            | $0.30 \pm 0.29$                   | $0.25 \pm 0.31$                        |            |
| x                    | x        |             |            | <b><math>0.34 \pm 0.28</math></b> | <b><math>0.26 \pm 0.29</math></b>      |            |
| x                    |          |             | x          | $0.28 \pm 0.25$                   | $0.24 \pm 0.39$                        |            |
|                      | x        | x           |            | $0.07 \pm 0.21$                   | $0.03 \pm 0.15$                        |            |
|                      |          | x           | x          | $0.19 \pm 0.30$                   | $0.14 \pm 0.33$                        |            |
|                      |          | x           | x          | $0.20 \pm 0.25$                   | $0.10 \pm 0.33$                        |            |
| x                    | x        | x           |            | $0.29 \pm 0.26$                   | $0.24 \pm 0.28$                        |            |
| x                    | x        |             | x          | $0.27 \pm 0.26$                   | $0.22 \pm 0.38$                        |            |
| x                    |          | x           | x          | $0.28 \pm 0.23$                   | $0.24 \pm 0.36$                        |            |
|                      | x        | x           | x          | $0.20 \pm 0.24$                   | $0.13 \pm 0.30$                        |            |
| x                    | x        | x           | x          | $0.27 \pm 0.24$                   | $0.22 \pm 0.38$                        |            |
|                      |          |             | Pprint     | $0.22 \pm 0.27$                   | $0.19 \pm 0.28$                        |            |
|                      |          |             | DRNApred   | $0.17 \pm 0.23$                   | $0.11 \pm 0.19$                        |            |

## S2. Empirical isoelectric point data by method of measurement

The empirical isoelectric point (pI) values for the 32 viruses in this study are shown in Figure S1, colored by method of pI determination. Electrophoretic mobility tends to be associated with lower pI measurements. However, there are few comparisons between electrophoretic mobility and alternative methods (such as isoelectric focusing and aggregation). In addition, some of the lowest isoelectric point measurements (HHAV and AAV4) were determined via isoelectric focusing. Confirmation of both the low and high range of isoelectric points by multiple methods would be invaluable in determining potential bias in these methods.

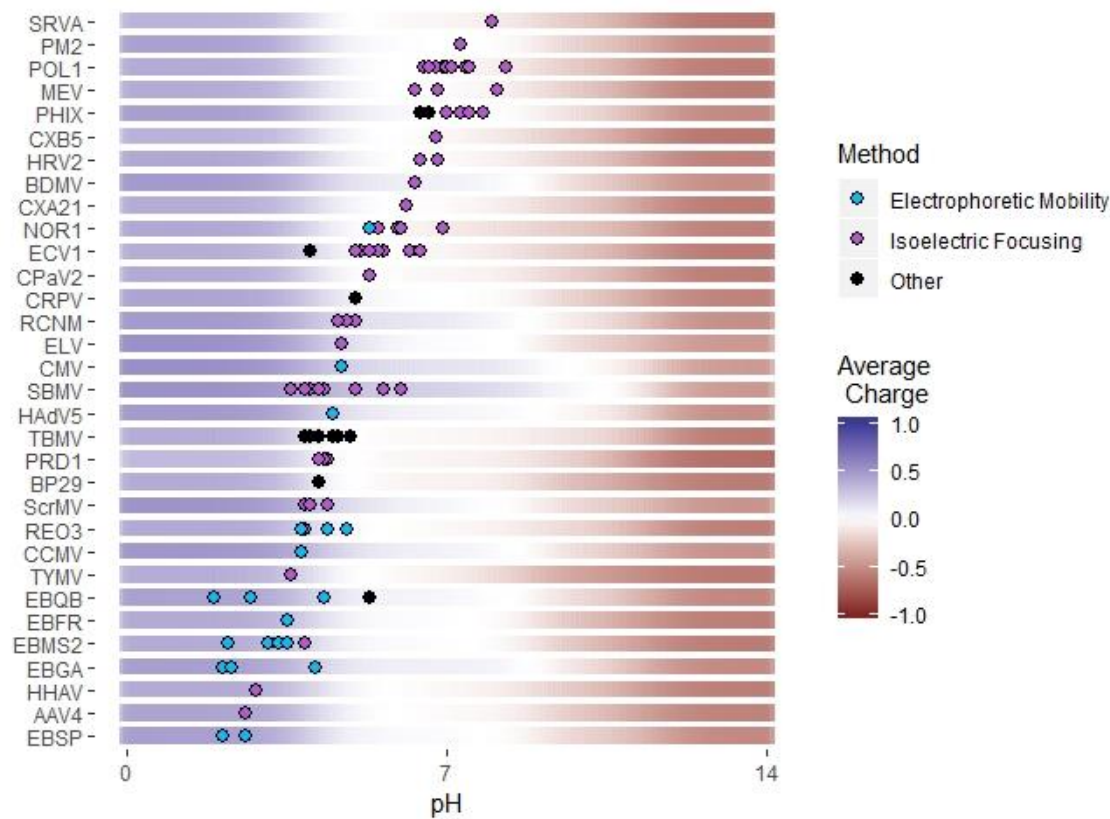

Figure S1: Distribution of empirical isoelectric points (filled circles) based on method of measurement. The theoretical charge of the (unmodified) virus capsid proteomes from pH 0 to 14 is displayed as color bars in the background. Based on unmodified theoretical charge, empirical pIs would be expected to fall within the white region of each bar.

### S3. Empirical isoelectric point data

The empirical isoelectric points (pIs) used in this study are supplied in Table S2. While many empirical pIs were summarized from Michen and Graule’s review (1), citations to the original papers are supplied here for reference.

Table S2. Empirical isoelectric point (pI) values from the literature used in this study

| Abbreviation | Virus                            | pI   | Reference |
|--------------|----------------------------------|------|-----------|
| AAV4         | Adeno-associated virus – 4       | 2.6  | (2)       |
| BDMV         | Belladonna mottle virus          | 6.3  | (3)       |
| BP29         | Bacillus phage phi29             | 4.2  | (4)       |
| CCMV         | Cowpea chlorotic mottle virus    | 3.8  | (5)       |
| CMV          | Cucumber mosaic virus 4          | 4.7  | (6)       |
| CPaV2        | Canine parvovirus 2 (Dog)        | 5.3  | (7)       |
| CRPV         | Cottontail rabbit papillomavirus | 5    | (8)       |
| CXA21        | Human coxsackievirus A 21        | 6.1  | (9)       |
| CXB5         | Human coxsackievirus B 5         | 6.75 | (10)      |
| EBFR         | Enterobacteria phage fr          | 3.5  | (11)      |
| EBGA         | Enterobacteria phage GA          | 4.1  | (11)      |
| EBGA         | Enterobacteria phage GA          | 2.1  | (12)      |
| EBGA         | Enterobacteria phage GA          | 2.3  | (12)      |
| EBMS2        | Enterobacteria phage MS2         | 3.9  | (11)      |
| EBMS2        | Enterobacteria phage MS2         | 3.5  | (13)      |
| EBMS2        | Enterobacteria phage MS2         | 3.1  | (12)      |
| EBMS2        | Enterobacteria phage MS2         | 3.9  | (12)      |
| EBMS2        | Enterobacteria phage MS2         | 3.9  | (14)      |
| EBMS2        | Enterobacteria phage MS2         | 3.5  | (15)      |
| EBMS2        | Enterobacteria phage MS2         | 2.2  | (16)      |
| EBMS2        | Enterobacteria phage MS2         | 3.3  | (16)      |
| EBMS2        | Enterobacteria phage MS2         | 3.5  | (16)      |
| EBMS2        | Enterobacteria phage MS2         | 3.9  | (17)      |
| EBQB         | Enterobacteria phage Qb          | 4.3  | (11)      |
| EBQB         | Enterobacteria phage Qb          | 1.9  | (12)      |
| EBQB         | Enterobacteria phage Qb          | 2.7  | (12)      |
| EBQB         | Enterobacteria phage Qb          | 5.3  | (14)      |
| EBSP         | Enterobacteria phage SP          | 2.1  | (12)      |
| EBSP         | Enterobacteria phage SP          | 2.6  | (12)      |
| ECV1         | Human echovirus 1                | 4    | (10)      |
| ECV1         | Human echovirus 1                | 5.1  | (9)       |
| ECV1         | Human echovirus 1                | 5.6  | (9)       |
| ECV1         | Human echovirus 1 (4CH-1)        | 5.5  | (17)      |
| ECV1         | Human echovirus 1 (R115)         | 6.2  | (17)      |
| ECV1         | Human echovirus 1 (V212)         | 6.4  | (17)      |

|       |                                      |      |      |
|-------|--------------------------------------|------|------|
| ECV1  | Human echovirus 1 (V239)             | 5.3  | (17) |
| ECV1  | Human echovirus 1 (V248)             | 5    | (17) |
| ELV   | Erysimum latent virus                | 4.7  | (3)  |
| HAdV5 | Human adenovirus 5                   | 4.5  | (18) |
| HHAV  | Hepatitis A virus                    | 2.8  | (19) |
| HRV2  | Human rhinovirus 2                   | 6.4  | (20) |
| HRV2  | Human rhinovirus 2                   | 6.8  | (21) |
| MEV   | Mengo encephalomyocarditis virus L   | 8.1  | (22) |
| MEV   | Mengo encephalomyocarditis virus M   | 6.3  | (22) |
| MEV   | Mengo encephalomyocarditis virus S   | 6.8  | (22) |
| NOR1  | Norovirus VLP                        | 5.3  | (15) |
| NOR1  | Norovirus VLP (Funabashi, Norwalk)   | 5.9  | (23) |
| NOR1  | Norovirus VLP (Kashiwa)              | 5.5  | (23) |
| NOR1  | Norovirus VLP (Narita)               | 6.9  | (23) |
| NOR1  | Norovirus VLP (Seto, Hawaii)         | 6    | (23) |
| PHIX  | Enterobacteria phage $\Phi$ X174     | 6.6  | (24) |
| PHIX  | Enterobacteria phage $\Phi$ X174     | 7    | (25) |
| PHIX  | Enterobacteria phage $\Phi$ X174     | 7.3  | (25) |
| PHIX  | Enterobacteria phage $\Phi$ X174     | 7.5  | (25) |
| PHIX  | Enterobacteria phage $\Phi$ X174     | 7.8  | (25) |
| PHIX  | Enterobacteria phage $\Phi$ X174     | 6.6  | (26) |
| PHIX  | Enterobacteria phage $\Phi$ X174     | 6.4  | (27) |
| PM2   | Pseudoalteromonas phage PM2          | 7.3  | (28) |
| POL1  | Poliovirus 1                         | 6.9  | (29) |
| POL1  | Poliovirus 1                         | 7.4  | (19) |
| POL1  | Poliovirus 1 (Brunender)             | 7.4  | (30) |
| POL1  | Poliovirus 1 (Brunhilde)             | 7    | (31) |
| POL1  | Poliovirus 1 (Brunhilde)             | 7.1  | (17) |
| POL1  | Poliovirus 1 (Chat)                  | 7.5  | (32) |
| POL1  | Poliovirus 1 (LSc2ab)                | 6.75 | (10) |
| POL1  | Poliovirus 1 (LSc2ab)                | 6.75 | (10) |
| POL1  | Poliovirus 1 (LSc2ab)                | 6.6  | (9)  |
| POL1  | Poliovirus 1 (LSc2ab)                | 6.6  | (17) |
| POL1  | Poliovirus 1 (Mahoney)               | 8.3  | (33) |
| POL1  | Poliovirus 2 (Sabin T2)              | 6.5  | (9)  |
| PRD1  | Enterobacteria phage PRD1 (PR722)    | 4.2  | (25) |
| PRD1  | Enterobacteria phage PRD1 (PR722)    | 4.3  | (25) |
| PRD1  | Enterobacteria phage PRD1 (PR722)    | 4.3  | (25) |
| PRD1  | Enterobacteria phage PRD1 (PR722)    | 4.4  | (25) |
| RCNM  | Red clover necrotic mosaic virus (A) | 5    | (34) |
| RCNM  | Red clover necrotic mosaic virus (B) | 4.8  | (34) |
| RCNM  | Red clover necrotic mosaic virus (C) | 4.6  | (34) |
| REO3  | Mammalian orthoreovirus 3 (Dearing)  | 3.9  | (33) |
| REO3  | Mammalian orthoreovirus 3 (Dearing)  | 3.8  | (35) |
| REO3  | Mammalian orthoreovirus 3 (Dearing)  | 3.8  | (36) |
| REO3  | Mammalian orthoreovirus 3 (Dearing)  | 3.8  | (36) |
| REO3  | Mammalian orthoreovirus 3 (Dearing)  | 4.4  | (36) |

|       |                                           |     |      |
|-------|-------------------------------------------|-----|------|
| REO3  | Mammalian orthoreovirus 3 (Dearing)       | 4.8 | (36) |
| SBMV  | Southern bean mosaic virus (Var 1)        | 3.9 | (37) |
| SBMV  | Southern bean mosaic virus (Var 1)        | 6   | (37) |
| SBMV  | Southern bean mosaic virus (Var 2)        | 4.3 | (37) |
| SBMV  | Southern bean mosaic virus (Var 2)        | 5.6 | (37) |
| SBMV  | Southern bean mosaic virus (Var 3)        | 4.2 | (37) |
| SBMV  | Southern bean mosaic virus (Var 3)        | 5   | (37) |
| SBMV  | Southern bean mosaic virus (Var 4)        | 3.6 | (37) |
| SBMV  | Southern bean mosaic virus (Var 4)        | 4   | (37) |
| ScrMV | Scrophularia mottle virus                 | 4   | (3)  |
| ScrMV | Scrophularia mottle virus (Anagyris)      | 4.4 | (38) |
| ScrMV | Scrophularia mottle virus (Czech isolate) | 3.9 | (38) |
| SRVA  | Simian rotavirus A (SA11)                 | 8   | (10) |
| TBMV  | Tobacco mosaic virus (Cucumber)           | 4   | (39) |
| TBMV  | Tobacco mosaic virus (Cucumber)           | 4.9 | (39) |
| TBMV  | Tobacco mosaic virus (Green aucuba)       | 4.5 | (39) |
| TBMV  | Tobacco mosaic virus (Holmes' masked)     | 3.9 | (39) |
| TBMV  | Tobacco mosaic virus (Holmes' rip-gras)   | 4.5 | (39) |
| TBMV  | Tobacco mosaic virus (J14D1)              | 4.2 | (39) |
| TBMV  | Tobacco mosaic virus (Ordinary)           | 3.9 | (39) |
| TBMV  | Tobacco mosaic virus (Yellow aucuba)      | 4.6 | (39) |
| TYMV  | Turnip yellow mosaic virus                | 3.6 | (3)  |

#### S4. Virus capsid proteins

##### S4.1. Experimental set

Table S3 provides a summary of capsid proteins for viruses with empirical pI data used in this study for all pI predictions and PBR prediction training. Protein sequences, DNA- or RNA-binding regions (PBRs), and information about the number of copies of each protein in the virus capsid were obtained from the UniProt database ([www.uniprot.org](http://www.uniprot.org)) (40) and additional references as noted in Table S3. Where information was not available for the copy number of minor proteins within the capsid (“Unknown”), those proteins were not included in the pI calculation. The “Binding Regions” listed in Table S3 were used as a training set for predicting PBRs throughout the entire experimental set of proteins.

Table S3. Viral capsid proteins referenced for pI and PBR prediction in this study

| Abbreviation | Virus                                     | UniProt Entry                        | Protein name                                     | Copy Number | Binding regions                    | References   |
|--------------|-------------------------------------------|--------------------------------------|--------------------------------------------------|-------------|------------------------------------|--------------|
| AAV4         | Adeno-associated virus 4                  | <a href="#">O41855</a>               | Major capsid (VP1)                               | 60          | 119-125, 139-145, 165-171, 298-305 | (41, 42)     |
| BDMV         | Belladonna mottle virus                   | <a href="#">P15158</a>               | Capsid (CP)                                      | 180         |                                    | (43)         |
| BP29         | <i>Bacillus</i> phage Φ29                 | <a href="#">B3VMP4</a>               | Capsid fiber protein (P8.5)                      | 165         |                                    | (44)         |
| BP29         | <i>Bacillus</i> phage Φ29                 | <a href="#">P03681</a>               | Primer terminal protein (TP) (TP)                | 1           |                                    | (45, 46)     |
| BP29         | <i>Bacillus</i> phage Φ29                 | <a href="#">P04331</a>               | Tail knob protein gp9 (Distal tube protein) (P9) | 6           |                                    | (44, 47)     |
| BP29         | <i>Bacillus</i> phage Φ29                 | <a href="#">P04332</a>               | Portal protein (P10)                             | 12          | 1-14                               | (44, 47, 48) |
| BP29         | <i>Bacillus</i> phage Φ29                 | <a href="#">P13849</a>               | Major capsid protein (P8)                        | 235         |                                    | (44, 49)     |
| BP29         | <i>Bacillus</i> phage Φ29                 | <a href="#">P15132</a>               | Morphogenesis protein 1 (P13)                    | 2           |                                    | (44, 50, 51) |
| BP29         | <i>Bacillus</i> phage Φ29                 | <a href="#">P20345 [1 – 691]</a>     | Pre-neck appendage protein (gP12)                | 12          |                                    | (44)         |
| BP29         | <i>Bacillus</i> phage Φ29                 | <a href="#">P68930</a>               | Proximal tail-tube connector (P11)               | 12          |                                    | (44, 46)     |
| CCMV         | Cowpea chlorotic mottle virus             | <a href="#">P03601</a>               | Capsid (CP)                                      | 180         | 11-23                              | (5, 52–54)   |
| CMV          | Cucumber virus (FNY)                      | <a href="#">P69466</a>               | Capsid (CP)                                      | 180         | 10-22                              | (5, 52, 55)  |
| CPAV2        | Canine parvovirus 2 (Dog)                 | <a href="#">P17455</a>               | Major capsid, 143 AA N-terminus (VP1)            | 6           |                                    | (56–58)      |
| CPAV2        | Canine parvovirus 2 (Dog)                 | <a href="#">P17455 [144-727]</a>     | Major capsid, smaller variant (VP2)              | 54          |                                    | (57, 58)     |
| CRPV         | Cottontail rabbit papillomavirus (Kansas) | <a href="#">P03102</a>               | Major capsid (L1)                                | 360         | 497-504                            | (59, 60)     |
| CRPV         | Cottontail rabbit papillomavirus (Kansas) | <a href="#">P03108</a>               | Minor capsid (L2)                                | 72          | 1-9                                | (60, 61)     |
| CXA21        | Coxsackievirus A21                        | <a href="#">P22055 [1541 – 1562]</a> | Viral protein genome linked (VPg)                | 1           |                                    | (62)         |
| CXA21        | Coxsackievirus A21                        | <a href="#">P22055 [2 – 69]</a>      | Inner capsid (VP4)                               | 60          |                                    | (62)         |
| CXA21        | Coxsackievirus A21                        | <a href="#">P22055 [342 – 581]</a>   | Capsid (VP3)                                     | 60          |                                    | (62)         |
| CXA21        | Coxsackievirus A21                        | <a href="#">P22055 [582 – 879]</a>   | Capsid (VP1)                                     | 60          |                                    | (62)         |
| CXA21        | Coxsackievirus A21                        | <a href="#">P22055 [70 – 341]</a>    | Capsid (VP2)                                     | 60          |                                    | (62)         |
| CXB5         | Human coxsackievirus B5 (Peterborough)    | <a href="#">Q03053 [1519 – 1540]</a> | Viral protein genome linked (VPg)                | 1           |                                    | (63)         |
| CXB5         | Human coxsackievirus B5 (Peterborough)    | <a href="#">Q03053 [2 – 69]</a>      | Inner capsid (VP4)                               | 60          |                                    | (63)         |
| CXB5         | Human coxsackievirus B5 (Peterborough)    | <a href="#">Q03053 [331 – 566]</a>   | Capsid (VP3)                                     | 60          |                                    | (63)         |
| CXB5         | Human coxsackievirus B5 (Peterborough)    | <a href="#">Q03053 [566 – 851]</a>   | Capsid (VP1)                                     | 60          |                                    | (63)         |
| CXB5         | Human coxsackievirus B5 (Peterborough)    | <a href="#">Q03053 [70 – 330]</a>    | Capsid (VP2)                                     | 60          |                                    | (63)         |
| EBFR         | Enterobacteria phage fr                   | <a href="#">P03614</a>               | Capsid (CP)                                      | 178         | 32-105                             | (64–67)      |

|       |                                                       |                                      |                                                  |         |                                 |                     |
|-------|-------------------------------------------------------|--------------------------------------|--------------------------------------------------|---------|---------------------------------|---------------------|
| EBFR  | Enterobacteria phage fr                               | <a href="#">P15966</a>               | Maturation (A)                                   | 1       | 26-233                          | (64, 65)            |
| EBGA  | Enterobacteria phage GA                               | <a href="#">P07234</a>               | Capsid (CP)                                      | 178     | 18-93                           | (68)                |
| EBGA  | Enterobacteria phage GA                               | <a href="#">P07394</a>               | Maturation (A)                                   | 1       |                                 | (68)                |
| EBMS2 | Escherichia phage MS2                                 | <a href="#">P03610</a>               | Maturation (A2)                                  | 1       | 26-233                          | (69–72)             |
| EBMS2 | Escherichia phage MS2                                 | <a href="#">P03612</a>               | Capsid (CP)                                      | 178     | 32-105                          | (69, 73, 74)        |
| EBSP  | Enterobacteria phage SP                               | <a href="#">P09673</a>               | Major capsid (CP)                                | 178     |                                 | (75)                |
| EBSP  | Enterobacteria phage SP                               | <a href="#">P09677</a>               | Minor capsid (A1)                                | 6       |                                 | (75)                |
| EBSP  | Enterobacteria phage SP                               | <a href="#">P09676</a>               | Maturation (A2)                                  | 1       | 156-174,<br>255-265,<br>321-325 | (75)                |
| EBQB  | Escherichia phage Qb                                  | <a href="#">P03615</a>               | Capsid (CP)                                      | 178     | 32-95                           | (76–81)             |
| EBQB  | Escherichia phage Qb                                  | <a href="#">Q8LTE2</a>               | Maturation (A2)                                  | 1       |                                 | (76, 81–83)         |
| EBQB  | Escherichia phage Qb                                  | <a href="#">Q8LTE1</a>               | Minor capsid protein (A1)                        | 6       |                                 | (80, 81, 83)        |
| ECV1  | Echovirus 1 (strain<br>Human/Egypt/Farouk/1951) (E-1) | <a href="#">O91734 [567 – 850]</a>   | Capsid (VP1)                                     | 60      |                                 | (84, 85)            |
| ECV1  | Echovirus 1 (strain<br>Human/Egypt/Farouk/1951) (E-1) | <a href="#">O91734 [70 – 330]</a>    | Capsid (VP2)                                     | 60      |                                 | (84, 85)            |
| ECV1  | Echovirus 1 (strain<br>Human/Egypt/Farouk/1951) (E-1) | <a href="#">O91734 [331 – 567]</a>   | Capsid (VP3)                                     | 60      |                                 | (84, 85)            |
| ECV1  | Echovirus 1 (strain<br>Human/Egypt/Farouk/1951) (E-1) | <a href="#">O91734 [2 – 69]</a>      | Inner capsid (VP4)                               | 60      |                                 | (84, 85)            |
| ECV1  | Echovirus 1 (strain<br>Human/Egypt/Farouk/1951) (E-1) | <a href="#">O91734 [1518 – 1539]</a> | Viral protein genome linked (VPg)                | 1       |                                 | (84, 85)            |
| ELV   | Erysimum latent virus                                 | <a href="#">P35927</a>               | Capsid (CP)                                      | 180     |                                 | (86, 87)            |
| HAdV5 | Human adenovirus C5                                   | <a href="#">P03253</a>               | Protease (Protease)                              | 10      |                                 | (88, 89)            |
| HAdV5 | Human adenovirus C5                                   | <a href="#">P03271</a>               | Packaging protein (IVa2)                         | 7       | 440-449                         | (89–91)             |
| HAdV5 | Human adenovirus C5                                   | <a href="#">P03281</a>               | hexon-interlacing protein (IX)                   | 240     |                                 | (88, 89, 92)        |
| HAdV5 | Human adenovirus C5                                   | <a href="#">P04133</a>               | Hexon protein (L3)                               | 720     |                                 | (88, 89, 92)        |
| HAdV5 | Human adenovirus C5                                   | <a href="#">P11818</a>               | Fiber protein (L5)                               | 36      |                                 | (88, 89, 93)        |
| HAdV5 | Human adenovirus C5                                   | <a href="#">P12537 [1 – 570]</a>     | Hexon-linking protein (IIIa)                     | 60      |                                 | (88, 89, 94)        |
| HAdV5 | Human adenovirus C5                                   | <a href="#">P12538</a>               | Penton protein (L2)                              | 60      |                                 | (88, 89, 94)        |
| HAdV5 | Human adenovirus C5                                   | <a href="#">P24936 [1 – 111]</a>     | Hexon-linking protein N (inner capsid<br>(VIIN)) | 120     |                                 | (88, 89)            |
| HAdV5 | Human adenovirus C5                                   | <a href="#">P24936 [158 – 227]</a>   | Hexon-linking protein C (inner capsid<br>(VIIC)) | 120     |                                 | (88, 89)            |
| HAdV5 | Human adenovirus C5                                   | <a href="#">P24937 [34 – 239]</a>    | Endosome lysis protein (VI)                      | 360     |                                 | (89, 91)            |
| HAdV5 | Human adenovirus C5                                   | <a href="#">P24938</a>               | core-capsid bridging protein<br>(CoreCapsid)     | 157     |                                 | (88, 89, 91)        |
| HAdV5 | Human adenovirus C5                                   | <a href="#">P68951 [25 – 198]</a>    | Histone-like nucleoprotein<br>(HistoneLike)      | 1070    | 1-173                           | (88, 89, 91,<br>94) |
| HAdV5 | Human adenovirus C5                                   | <a href="#">Q2KS10 [33 – 51]</a>     | Core protein X (X)                               | 143     | 1-19                            | (88, 89)            |
| HHAV  | Hepatitis A virus                                     | <a href="#">P08617 [1497 – 1519]</a> | Viral protein genome linked (VPg)                | 1       |                                 | (95–97)             |
| HHAV  | Hepatitis A virus                                     | <a href="#">P08617 [1 – 23]</a>      | Inner capsid (VP4)                               | Unknown |                                 | (95–97)             |



|      |                                          |                                      |                                   |         |      |                      |
|------|------------------------------------------|--------------------------------------|-----------------------------------|---------|------|----------------------|
| HHAV | Hepatitis A virus                        | <a href="#">P08617 [24 – 245]</a>    | Capsid (VP2)                      | 60      |      | (95–97)              |
| HHAV | Hepatitis A virus                        | <a href="#">P08617 [246 – 491]</a>   | Capsid (VP3)                      | 60      |      | (95–97)              |
| HHAV | Hepatitis A virus                        | <a href="#">P08617 [492 – 765]</a>   | Capsid (VP1)                      | 60      |      | (95–97)              |
| HRV2 | Human rhinovirus 2                       | <a href="#">P04936 [1487 – 1507]</a> | Viral protein genome linked (VPg) | 1       |      | (98)                 |
| HRV2 | Human rhinovirus 2                       | <a href="#">P04936 [2 – 69]</a>      | Inner capsid (VP4)                | 60      |      | (98)                 |
| HRV2 | Human rhinovirus 2                       | <a href="#">P04936 [331 – 565]</a>   | Capsid (VP3)                      | 60      |      | (98)                 |
| HRV2 | Human rhinovirus 2                       | <a href="#">P04936 [565 – 85]</a>    | Capsid (VP1)                      | 60      |      | (98)                 |
| HRV2 | Human rhinovirus 2                       | <a href="#">P04936 [70 – 330]</a>    | Capsid (VP2)                      | 60      |      | (98)                 |
| MEV  | Mengo encephalomyocarditis virus         | <a href="#">P12296 [138 – 393]</a>   | Capsid (VP2)                      | 60      |      | (98)                 |
| MEV  | Mengo encephalomyocarditis virus         | <a href="#">P12296 [1609 – 1628]</a> | Viral protein genome linked (VPg) | 1       |      | (99)                 |
| MEV  | Mengo encephalomyocarditis virus         | <a href="#">P12296 [394 – 624]</a>   | Capsid (VP3)                      | 60      |      | (99, 100)            |
| MEV  | Mengo encephalomyocarditis virus         | <a href="#">P12296 [625 – 901]</a>   | Capsid (VP1)                      | 60      |      | (99)                 |
| MEV  | Mengo encephalomyocarditis virus         | <a href="#">P12296 [68 – 137]</a>    | Inner capsid (VP4)                | 60      |      | (99)                 |
| NOR1 | Norwalk Virus (Funabashi)                | <a href="#">Q83883 [963 – 1100]</a>  | Viral protein genome linked (VPg) | 1       |      | (101, 102)           |
| NOR1 | Norwalk Virus (Funabashi)                | <a href="#">Q83884</a>               | Capsid (VP1)                      | 180     |      | (102)                |
| NOR1 | Norwalk Virus (Funabashi)                | <a href="#">Q83885</a>               | Structural/packaging (VP2)        | 1       |      | (102)                |
| PHIX | Enterobacteriophage $\Phi$ X174 (Sanger) | <a href="#">P03641</a>               | Capsid (F)                        | 60      |      | (103–106)            |
| PHIX | Enterobacteriophage $\Phi$ X174 (Sanger) | <a href="#">P03643</a>               | Major spike (G)                   | 60      |      | (103, 104, 107, 108) |
| PHIX | Enterobacteriophage $\Phi$ X174 (Sanger) | <a href="#">P03646</a>               | Minor spike (H)                   | 12      |      | (103, 104)           |
| PHIX | Enterobacteriophage $\Phi$ X174 (Sanger) | <a href="#">P69592</a>               | DNA-binding (J)                   | 60      | 1-38 | (103, 109, 110)      |
| PM2  | Pseudoalteromonas phage PM2              | <a href="#">P15794</a>               | Major capsid protein (P2)         | 1200    |      | (111–113)            |
| PM2  | Pseudoalteromonas phage PM2              | <a href="#">Q37958</a>               | Protein P4 (P4)                   | 300     |      | (112–115)            |
| PM2  | Pseudoalteromonas phage PM2              | <a href="#">Q9XJR1</a>               | Protein P6 (P6)                   | 60      |      | (112, 113, 116)      |
| PM2  | Pseudoalteromonas phage PM2              | <a href="#">Q9XJR2</a>               | Protein P5 (P5)                   | Unknown |      | (112, 113)           |
| PM2  | Pseudoalteromonas phage PM2              | <a href="#">Q9XJR3</a>               | Spike Protein (P1)                | 60      |      | (112, 113)           |
| PM2  | Pseudoalteromonas phage PM2              | <a href="#">Q9XJR5</a>               | Protein P8 (P8)                   | Unknown |      | (112, 113)           |
| PM2  | Pseudoalteromonas phage PM2              | <a href="#">Q9XJR6</a>               | Protein P3 (P3)                   | 240     |      | (112, 113, 116)      |
| PM2  | Pseudoalteromonas phage PM2              | <a href="#">Q9XJR8</a>               | Peptidoglycan hydrolase P7 (P7)   | Unknown |      | (112, 113)           |
| PM2  | Pseudoalteromonas phage PM2              | <a href="#">Q9XJR9</a>               | Protein P9 (P9)                   | Unknown |      | (112, 113)           |
| POL1 | Poliovirus 1 (Mahoney)                   | <a href="#">P03300 [1544 – 1565]</a> | Viral protein genome linked (VPg) | 1       |      | (117–119)            |
| POL1 | Poliovirus 1 (Mahoney)                   | <a href="#">P03300 [2 – 69]</a>      | Inner capsid (VP4)                | 60      | 34   | (117, 118, 120)      |

|      |                                  |                                    |                                                  |         |         |                 |
|------|----------------------------------|------------------------------------|--------------------------------------------------|---------|---------|-----------------|
| POL1 | Poliovirus 1 (Mahoney)           | <a href="#">P03300 [342 – 579]</a> | Capsid (VP3)                                     | 60      | 223     | (117, 118, 120) |
| POL1 | Poliovirus 1 (Mahoney)           | <a href="#">P03300 [580 – 881]</a> | Capsid (VP1)                                     | 60      | 129     | (117, 118, 120) |
| POL1 | Poliovirus 1 (Mahoney)           | <a href="#">P03300 [70 – 341]</a>  | Capsid (VP2)                                     | 60      |         | (117, 118)      |
| PRD1 | Enterobacteria phage PR772       | <a href="#">P09009</a>             | DNA terminal protein (Protein P8) (P8)           | 1       |         | (121–124)       |
| PRD1 | Enterobacteria phage PR772       | <a href="#">P13559</a>             | Endolysin (Protein P15) (P15)                    | Unknown |         | (122, 124, 125) |
| PRD1 | Enterobacteria phage PR772       | <a href="#">P22535</a>             | Major capsid protein P3 (Protein P3) (P3)        | 705     |         | (121, 126, 127) |
| PRD1 | Enterobacteria phage PR772       | <a href="#">P22536</a>             | Spike protein P5 (Protein P5) (P5)               | 33      |         | (121, 127, 128) |
| PRD1 | Enterobacteria phage PR772       | <a href="#">P27378</a>             | Adsorption protein P2 (Protein P2) (P2)          | 11      |         | (121, 124, 128) |
| PRD1 | Enterobacteria phage PR772       | <a href="#">P27379</a>             | Packaging efficiency factor P6 (P6)              | 12      |         | (121, 124, 126) |
| PRD1 | Enterobacteria phage PR772       | <a href="#">P27380</a>             | Transglycosylase (EC 4.2.2.n1) (Protein P7) (P7) | 20      |         | (121, 124)      |
| PRD1 | Enterobacteria phage PR772       | <a href="#">P27381</a>             | DNA packaging ATPase P9 (Protein P9) (P9)        | 12      |         | (121, 124, 126) |
| PRD1 | Enterobacteria phage PR772       | <a href="#">P27382</a>             | Infectivity protein P11 (P11)                    | Unknown |         | (121, 124)      |
| PRD1 | Enterobacteria phage PR772       | <a href="#">P27384</a>             | Penton protein P31 (GpC) (Protein C) (P31)       | 11      |         | (121, 124, 128) |
| PRD1 | Enterobacteria phage PR772       | <a href="#">P27387</a>             | Packaging protein P20 (P20)                      | 6       |         | (121, 124, 126) |
| PRD1 | Enterobacteria phage PR772       | <a href="#">P27388</a>             | Packaging protein P22 (GpK) (Protein K) (P22)    | 6       |         | (121, 124)      |
| PRD1 | Enterobacteria phage PR772       | <a href="#">P27389</a>             | Protein P18 (GpM) (Protein M) (P18)              | Unknown |         | (121, 124)      |
| PRD1 | Enterobacteria phage PR772       | <a href="#">P27390</a>             | Protein P34 (Protein O) (GpO) (P34)              | Unknown |         | (121, 124)      |
| PRD1 | Enterobacteria phage PR772       | <a href="#">P27391</a>             | Minor capsid protein P30 (Protein P) (GpP) (P30) | 55      |         | (121, 124, 126) |
| PRD1 | Enterobacteria phage PR772       | <a href="#">P27392</a>             | Protein P16 (GpS) (Protein S) (P16)              | 11      |         | (121, 124, 126) |
| PRD1 | Enterobacteria phage PR772       | <a href="#">Q3T4M7</a>             | Protein P32 (P32)                                | Unknown |         | (121, 124)      |
| RCNM | Red clover necrotic mosaic virus | <a href="#">P22955</a>             | Capsid (CP)                                      | 180     | 1-46    | (129–131)       |
| REO3 | Reovirus 3 (Dearing)             | <a href="#">P03525</a>             | Inner capsid protein sigma-2 (S2)                | 150     |         | (132–137)       |
| REO3 | Reovirus 3 (Dearing)             | <a href="#">P03527</a>             | Outer capsid protein sigma-3 (S3)                | 39      |         | (134, 138, 139) |
| REO3 | Reovirus 3 (Dearing)             | <a href="#">P03528</a>             | Outer capsid protein sigma-1 (S1)                | 36      |         | (134, 140–143)  |
| REO3 | Reovirus 3 (Dearing)             | <a href="#">P0CK31</a>             | Inner polymerase lambda-3 (L3)                   | 12      |         | (134, 144)      |
| REO3 | Reovirus 3 (Dearing)             | <a href="#">P11078</a>             | Outer capsid protein mu-1 (M1)                   | 39      |         | (134, 145, 146) |
| REO3 | Reovirus 3 (Dearing)             | <a href="#">P11079</a>             | Outer capsid protein lambda-2 (L2)               | 60      | 893-900 | (134, 147, 148) |

|       |                                |                        |                                                |      |            |                 |
|-------|--------------------------------|------------------------|------------------------------------------------|------|------------|-----------------|
| REO3  | Reovirus 3 (Dearing)           | <a href="#">P12418</a> | Inner microtubule-associated protein mu-2 (M2) | 12   |            | (134, 149–151)  |
| REO3  | Reovirus 3 (Dearing)           | <a href="#">P15024</a> | Inner capsid protein lambda-1 (L1)             | 120  |            | (134, 152, 153) |
| SBMV  | Southern bean mosaic virus     | <a href="#">Q72158</a> | Capsid (CP)                                    | 180  | 26-35      | (154)           |
| ScrMV | Scrophularia mottle virus      | <a href="#">Q3BD98</a> | Capsid (CP)                                    | 180  |            | (155)           |
| SRVA  | Simian rotavirus A (SA11)      | <a href="#">A2T3P5</a> | Outer capsid glycoprotein VP7 (VP7)            | 780  |            | (156)           |
| SRVA  | Simian rotavirus A (SA11)      | <a href="#">A2T3R5</a> | Inner capsid protein VP2 (VP2)                 | 120  |            | (156, 157)      |
| SRVA  | Simian rotavirus A (SA11)      | <a href="#">A2T3S0</a> | RNA-directed RNA polymerase (RdRp)             | 12   |            | (156)           |
| SRVA  | Simian rotavirus A (SA11)      | <a href="#">A2T3S5</a> | Protein VP3 (VP3)                              | 12   |            | (156)           |
| SRVA  | Simian rotavirus A (SA11)      | <a href="#">A2T3T0</a> | Intermediate capsid protein VP6 (VP6)          | 690  |            | (156)           |
| SRVA  | Simian rotavirus A (SA11)      | <a href="#">A2T3S5</a> | Outer capsid protein VP4 (VP4)                 | 180  |            | (156)           |
| TBMV  | Tobacco mosaic virus (Vulgare) | <a href="#">P69687</a> | Capsid (CP)                                    | 2130 |            | (158–163)       |
| TYMV  | Turnip yellow mosaic virus     | <a href="#">P03608</a> | Capsid (CP)                                    | 180  | 67-68, 180 | (164–171)       |

#### S4.2. Validation set

A validation set for confirming the effectiveness of PBR prediction methods was acquired by searching the UniProt database for reviewed entries of proteins occurring within the virion with annotated regions for RNA- or DNA-binding, as shown in Table S4. In order to include a diversity of viruses and avoid over-representing features typical of a subset of viruses, enveloped virus proteins were included in the validation set. Preference was given to proteins with PBRs referenced by publication wherever possible. Genome polyproteins were excluded from the search because the XNA-binding regions in these sequences frequently occurred outside a capsid protein sequence.

Table S4: Capsid proteins used to validate polynucleotide-binding region predictions

| Virus                                                  | UniProt Entry          | Protein Name                                                   | Binding Regions                 | References |
|--------------------------------------------------------|------------------------|----------------------------------------------------------------|---------------------------------|------------|
| Arctic squirrel hepatitis virus (ASHV)                 | <a href="#">Q64897</a> | Capsid protein (Core antigen) (Core protein) (HBcAg) (p21.5)   | 160-179,<br>181-187             | (172)      |
| Avian infectious bronchitis virus (Arkansas 99) (IBV)  | <a href="#">Q64960</a> | Nucleoprotein (Nucleocapsid protein) (NC) (Protein N)          | 29-16                           | (173)      |
| Bacillus phage B103 (Bacteriophage B103)               | <a href="#">Q37883</a> | DNA terminal protein (Gene product 3) (gp3) (Protein p3)       | 1-73                            | (174)      |
| Bacillus phage Nf (Bacteriophage Nf)                   | <a href="#">P06812</a> | DNA terminal protein (Gene product 3) (gp3) (Protein p3)       | 1-73                            | (175, 176) |
| Bat coronavirus (BtCoV/133/2005)                       | <a href="#">Q004E6</a> | Nucleoprotein (Nucleocapsid protein) (NC) (Protein N)          | 33-175                          | (177)      |
| Beak and feather disease virus (BFDV)                  | <a href="#">Q9YUC8</a> | Capsid protein                                                 | 1-4, 15-54                      | (178)      |
| Bovine coronavirus (98TXSF-110-ENT) (BCV)              | <a href="#">Q91A22</a> | Nucleoprotein (Nucleocapsid protein) (NC) (Protein N)          | 52-194                          | (179)      |
| Canary circovirus (CaCV)                               | <a href="#">Q8QME6</a> | Probable capsid protein                                        | 1-39                            | (180)      |
| Canine coronavirus (BGF10) (CCoV)                      | <a href="#">Q7T6S8</a> | Nucleoprotein (Nucleocapsid protein) (NC) (Protein N)          | 33-159                          | (181)      |
| Chicken anemia virus (Germany Cuxhaven-1) (CAV)        | <a href="#">Q99153</a> | Capsid protein (CA1) (Coat protein)                            | 1-43                            | (182, 183) |
| Chimpanzee hepatitis B virus (United Kingdom/LSH/1988) | <a href="#">P12901</a> | Capsid protein (Core antigen) (Core protein) (HBcAg) (p21.5)   | 155-183                         | (184)      |
| Enterobacteria phage f2 (Bacteriophage f2)             | <a href="#">P03611</a> | Capsid protein (CP) (Coat protein)                             | 31-104                          | (185, 186) |
| Enterobacteria phage JP34 (Bacteriophage JP34)         | <a href="#">P34700</a> | Capsid protein (CP) (Coat protein)                             | 31-104                          | (187)      |
| Enterobacteria phage MX1 (Bacteriophage MX1)           | <a href="#">O64306</a> | Maturation protein A2 (MP) (A2) (Assembly protein) (A protein) | 159-177,<br>227-237,<br>295-299 | (188, 189) |
| Enterobacteria phage R17 (Bacteriophage R17)           | <a href="#">P69170</a> | Capsid protein (CP) (Coat protein)                             | 31-104                          | (190)      |
| Enterobacteria phage ZR (Bacteriophage ZR)             | <a href="#">P69171</a> | Capsid protein (CP) (Coat protein)                             | 32-105                          | (191, 192) |
| Equine coronavirus (NC99) (ECoV)                       | <a href="#">Q9DQX6</a> | Nucleoprotein (Nucleocapsid protein) (NC) (Protein N)          | 52-193                          | (193)      |

|                                                                                       |                        |                                                                                    |                             |            |
|---------------------------------------------------------------------------------------|------------------------|------------------------------------------------------------------------------------|-----------------------------|------------|
| Hepatitis delta virus genotype I (American) (HDV)                                     | <a href="#">P0C6L5</a> | Large delta antigen (L-HDAg) (p27)                                                 | 97-107                      | (194)      |
| Human adenovirus B serotype 7 (HAdV-7)                                                | <a href="#">P03273</a> | Packaging protein 1 (Packaging protein IVa2)                                       | 440-448                     | (195)      |
| Human adenovirus C serotype 2 (HAdV-2)                                                | <a href="#">P03272</a> | Packaging protein 1 (Packaging protein IVa2)                                       | 440-449                     | (196)      |
| Human coronavirus 229E (HCoV-229E)                                                    | <a href="#">P15130</a> | Nucleoprotein (Nucleocapsid protein) (NC) (Protein N)                              | 22-148                      | (197–199)  |
| Human herpesvirus 1 (17) (HHV-1)                                                      | <a href="#">P10231</a> | Tegument protein UL47 (82/81 kDa tegument protein) (VMW82/81) (VP13/14)            | 9-12, 50-75                 | (200, 201) |
| Human herpesvirus 2 (HG52) (HHV-2)                                                    | <a href="#">P89467</a> | Tegument protein UL47 (82/81 kDa tegument protein) (VMW82/81) (VP13/14)            | 9-12, 57-84, 70-73, 527-530 | (202)      |
| Human immunodeficiency virus type 1 group M subtype A (MAL) (HIV-1)                   | <a href="#">P04599</a> | Virion infectivity factor (Vif) (SOR protein) [Cleaved into: p17; p7]              | 75-114                      | (203)      |
| Human SARS coronavirus (SARS-CoV)                                                     | <a href="#">P59595</a> | Nucleoprotein (Nucleocapsid protein) (NC) (Protein N)                              | 42-187                      | (204–209)  |
| Maize stripe virus (MStV)                                                             | <a href="#">P27207</a> | Nucleoprotein (Coat protein) (CP) (Nucleocapsid protein) (Protein N) (Protein pc3) | 201-316                     | (210)      |
| Middle East respiratory syndrome-related coronavirus (United Kingdom/H123990006/2012) | <a href="#">K9N4V7</a> | Nucleoprotein (Nucleocapsid protein) (NC) (Protein N)                              | 33-175                      | (211)      |
| Porcine circovirus 2 (PCV2)                                                           | <a href="#">Q56129</a> | Capsid protein                                                                     | 1-47                        | (212, 213) |
| Porcine epidemic diarrhea virus (CV777) (PEDV)                                        | <a href="#">Q07499</a> | Nucleoprotein (Nucleocapsid protein) (NC) (Protein N)                              | 16-146                      | (214–216)  |
| Porcine hemagglutinating encephalomyelitis virus (67N)                                | <a href="#">Q8BB23</a> | Nucleoprotein (Nucleocapsid protein) (NC) (Protein N)                              | 52-194                      | (217)      |
| Porcine transmissible gastroenteritis coronavirus (FS772/70)                          | <a href="#">P05991</a> | Nucleoprotein (Nucleocapsid protein) (NC) (Protein N)                              | 33-159                      | (218)      |
| Reston ebolavirus (Philippines-96) (REBOV)                                            | <a href="#">Q91DD6</a> | Minor nucleoprotein VP30 (Transcription activator VP30)                            | 26-4                        | (219)      |
| Rice dwarf virus (Akita) (RDV)                                                        | <a href="#">Q85448</a> | Protein P7 (55 kDa core protein)                                                   | 128-249, 325-355            | (220)      |
| Rice gall dwarf virus (RGDV)                                                          | <a href="#">A4PBP8</a> | Protein P7                                                                         | 129-251, 321-351            | (221)      |
| Rice stripe virus (M) (RSV)                                                           | <a href="#">P68560</a> | Nucleoprotein (Coat protein) (CP) (Nucleocapsid protein) (Protein N) (Protein pc3) | 201-322                     | (222, 223) |
| Satellite tobacco necrosis virus 1                                                    | <a href="#">P03606</a> | Capsid protein (Coat protein)                                                      | 1-19                        | (224)      |
| Simian virus 40 (SV40)                                                                | <a href="#">P03093</a> | Minor capsid protein VP2 (Minor structural protein VP2)                            | 313-352                     | (225, 226) |
| Turkey coronavirus (Indiana) (TCV)                                                    | <a href="#">Q9PZ51</a> | Nucleoprotein (Nucleocapsid protein) (NC) (Protein N)                              | 29-16                       | (227, 228) |
| Wheat yellow head virus (WYHV)                                                        | <a href="#">P84254</a> | Nucleoprotein (Coat protein) (CP) (Nucleocapsid protein) (Protein N) (Protein pc3) | 198-314                     | (229)      |
| Wound tumor virus (NJ) (WTV)                                                          | <a href="#">P31610</a> | Protein P7 (60 kDa core protein)                                                   | 129-253, 331-361            | (230)      |

## S5. R functions

The R code used to predict PBR regions in capsid proteins is provided below. Since most functions rely on secondary structure prediction via NetSurfP 2.0 (231, 232), the input to all functions is assumed to be the spreadsheet (.csv) output of NetSurfP 2.0 (here assigned to the object 'netSurf'), with columns identifying the virus ('Abbreviation') and protein ('ID') for a given sequence. Results of this code as applied to the proteomes in Table S3 are provided in the Supporting Information following the References.

```
ARGrichFinder <- function(RKratioMin = 0.24, netSurfDF = netSurf, gapMax = 10, RKmin = 5,
  AAaccepted = c("R", "K"), turnClause = F, turnMin = 2){
  # Function to find Arginine- and Lysine-rich windows of indeterminate length in proteome sequences
  # gapMax: maximum allowed distance between consecutive R/K's in ARG-rich zones
  # RKmin= 5 excludes chance occurrence of 1 to 4 R/K's within AA sequence
  # RKratioMin: the optimizable variable
  # turnClause allows the same code to be adapted to find turns, as in the function 'betaTurnFinder'
  netSurfDF$isRK = netSurfDF$seq %in% AAaccepted
  netSurfRK = netSurfDF %>% filter(isRK == T)
  netSurfRK$regionID = cumsum(c(1, abs(diff(netSurfRK$n)) > gapMax))

  RKsumm = netSurfRK %>% group_by(regionID, Abbreviation, ID) %>% summarize(RKcount = n(), start = min(n),
    end = max(n), RKratio = n()/(max(n)-min(n)+1),
    turn = sum((q8 %in% c("T", "S"))))

  if(turnClause == TRUE){RKsumm = RKsumm %>% filter((RKcount >= RKmin & RKratio >= RKratioMin)|
    (turn > 0 & RKcount >= turnMin))
  } else{RKsumm = RKsumm %>% filter(RKcount >= RKmin & RKratio >= RKratioMin)}

  netSurfPred = left_join(netSurfDF, ungroup(RKsumm))
  netSurfPred$Prediction = 0
  netSurfPred$Prediction[netSurfPred$n >= netSurfPred$start & netSurfPred$n <= netSurfPred$end] = 1
  netSurfPred = netSurfPred %>% group_by(Abbreviation, ID, n, seq) %>%
    summarize(Prediction = sum(Prediction))
  return(ungroup(netSurfPred))
}
```

```

betaTurnFinder <- function(){
  # A function to predict beta turn PBRs based on netSurfP output.
  ## A special instance of the ARGrichFinder that ignores minimum RK ratio. Minimum number of
  ## basic residues is determined by 'turnMin' rather than 'RKmin', and histidines are added to
  ## accepted basic residues.
  ## Both RKratioMin and RKmin are set to unattainably high values to preclude the identification of
  ## other ARG-rich regions.
  ## turnClause = T: only ARG-rich regions on beta turns considered
  ## turnMin = 2: at least 2 basic residues must occur on a given region
  ## gapMax: maximum distance between consecutive basic residues
  ## AAaccepted: arginine, lysine and histidine are all counted as basic residues
  output = ARGrichFinder(1.2, gapMax = 4, RKmin = 999, turnMin = 2,
    turnClause = T, AAaccepted = c("R", "K", "H"))
  return(output)
}

```

# Supporting function for betaSheetFinder

```

netBasic <- function(AAvec, posVec = c('R', 'H', 'K'), negVec = c('C', 'D', 'E', 'Y')){
  ### Identifies the number of net positive (basic) or negative (acidic) ionizable amino acids
  # within a polypeptide sequence (vector input 'AAvec')
  AAs <- table(AAvec)
  netPos = sum(AAs[names(AAs) %in% posVec]) - sum(AAs[names(AAs) %in% negVec])
  return(netPos)
}

```

```

betaSheetFinder <- function(chargeMin = 0, netSurfDF = netSurf, maxDistance = 1, minLength = 12,
  posVec = c('R', 'K', 'H'), negVec = c('C', 'D', 'E'), q8allowed = c("E")){
  ## function that identifies and returns beta sheet PBRs. chargeMin is the minimum
  # (positive) net charge to consider the region basic. maxDistance is the distance allowed
  # between AAs to consider part of the same sheet (maxDistance = 1 implies no gaps). minLength
  # is the minimum length of betasheets to be considered.
  require(dplyr)

```

```

betas = netSurfDF[netSurfDF$q8 %in% q8allowed, ]
betas$regionID = cumsum(c(1, abs(diff(betas$n)) > maxDistance))

betaCharges = as.data.frame(betas %>% group_by(regionID) %>% summarize(netC = netBasic(seq, posVec, negVec), len = n()))
betaCharges = ungroup(betaCharges)
basicCharges = filter(betaCharges, netC >= chargeMin & len >= minLength)

basicBetas = filter(betas, regionID %in% basicCharges$regionID)
netSurfPred = left_join(netSurfDF, basicBetas)
netSurfPred$Prediction = !(is.na(netSurfPred$regionID))
return(netSurfPred)
}

```

```

disTermFinder <- function(disorderMin = 0.66, netSurfDF= netSurf){
# Function to identify disordered C- and N-termini PBRs based on netSurfP output
require(dplyr)
randos = netSurfDF[netSurfDF$disorder > disorderMin, ]
netSurfSumm = netSurfDF %>% group_by(Abbreviation, ID) %>% summarize(len = n())
randos$regionID = cumsum(c(1, abs(diff(randos$n)) > 1))

randos = as.data.frame(left_join(randos, netSurfSumm, by = c("Abbreviation", "ID")))

#N-termini include residue 1
Nterms = as.data.frame(randos %>% group_by(regionID) %>% filter(1 %in% n))
#C-termini include the final residue
Cterms = as.data.frame(randos %>% group_by(regionID) %>% filter(0 %in% (n - len)))
randTerms = distinct(rbind(ungroup(Nterms), ungroup(Cterms)))
netSurfPred = left_join(netSurfDF, randTerms)
netSurfPred$Prediction = !(is.na(netSurfPred$regionID))
return(netSurfPred)
}

```



```

predJoin <- function(fOutput1, fOutput2){
  # Function to merge 2 predictions (just define Prediction as A OR B)
  predJ = left_join(fOutput1, fOutput2, by = c("Abbreviation", "ID", "n", "seq"))
  predJ$Prediction = predJ$Prediction.x | predJ$Prediction.y
  predJ$Prediction.x = NULL
  predJ$Prediction.y = NULL
  return(predJ)
}

```

## References

1. Michen B, Graule T. 2010. Isoelectric points of viruses. *J Appl Microbiol* 109:388–397.
2. Salo RJ, Mayor HD. 1978. Isoelectric Focusing of Parvoviruses. *Intervirology* 10:87–93.
3. Petrzik K. 1993. Physicochemical properties of four tymoviruses. *Acta Virol* 37:271–275.
4. Rubio V, Salas M, Viñuela E. 1974. Biophysical properties of bacteriophage phi29. *Virology* 57:112–121.
5. Suci PA, Klem MT, Douglas T, Young M. 2005. Influence of electrostatic interactions on the surface adsorption of a viral protein cage. *Langmuir* 21:8686–8693.
6. van Regenmortel MHV. 1967. Biochemical and biophysical properties of cucumber mosaic virus. *Virology* 31:391–396.
7. Weichert WS, Parker JSL, Wahid ATM, Chang SF, Meier E, Parrish CR. 1998. Assaying for structural variation in the parvovirus capsid and its role in infection. *Virology* 250:106–117.
8. Beard JW, Wykoff RWG. 1938. The pH stability of papilloma virus protein. *J Biol Chem* 123:461–470.
9. Murray JP, Parks GA. 1980. Poliovirus adsorption on oxide surfaces, p. 97–133. *In* Kavanaugh, MC, Leckie, JO (eds.), *Particulates in Water*. American Chemical Society.
10. Butler M, Medlen AR, Taylor GR. 1985. Electrofocusing of viruses and sensitivity to disinfection. *Water Sci Technol* 17:201–210.
11. Armanious A, Aeppli M, Jacak R, Refardt D, Sigstam T, Kohn T, Sander M. 2015. Viruses at Solid-Water Interfaces: A Systematic Assessment of Interactions Driving Adsorption. *Environ Sci Technol* 50:732–743.

12. Langlet J, Gaboriaud F, Duval JFL, Gantzer C. 2008. Aggregation and surface properties of F-specific RNA phages: Implication for membrane filtration processes. *Water Res* 42:2769–2777.
13. Dika C, Duval JFL, Ly-Chatain HM, Merlin C, Gantzer C. 2011. Impact of internal RNA on aggregation and electrokinetics of viruses: Comparison between MS2 phage and corresponding virus-like particles. *Appl Environ Microbiol* 77:4939–4948.
14. Overby LR, Barlow GH, Doi RH, Jacob M, Spiegelman S. 1966. Comparison of two serologically distinct ribonucleic acid bacteriophages. II. Properties of the nucleic acids and coat proteins. *J Bacteriol* 92:739–745.
15. Redman JA, Grant SB, Olson TM, Hardy ME, Estes MK. 1997. Filtration of recombinant norwalk virus particles and bacteriophage MS2 in quartz sand: Importance of electrostatic interactions. *Environ Sci Technol* 31:3378–3383.
16. Yuan B, Pham M, Nguyen TH. 2008. Deposition kinetics of bacteriophage MS2 on a silica surface coated with natural organic matter in a radial stagnation point flow cell. *Environ Sci Technol* 42:7628–7633.
17. Zerda KS, Gerba CP. 1984. Agraose isoelectrofocusing of intact virions. *J Virol Methods* 9:1–6.
18. Trilisky EI, Lenhoff AM. 2007. Sorption processes in ion-exchange chromatography of viruses. *J Chromatogr A* 1142:2–12.
19. Nasser AM, Battagelli D, Sobsey MD. 1992. Isoelectric focusing of hepatitis A virus in sucrose gradients. *Isr J Med Sci* 28:73.
20. Korant BD, Lonberg-Holm K, Yin FH, Noble-Harvey J. 1975. Fractionation of biologically active and inactive populations of human rhinovirus type 2. *Virology* 63:384–394.
21. Schnabel U, Groiss F, Blaas D, Kenndler E. 1996. Determination of the pI of Human Rhinovirus Serotype 2 by Capillary Isoelectric Focusing. *Anal Chem* 68:4300–4303.
22. Chlumecka V, D'Obrenan P, Colter JS. 1973. Electrophoretic studies of three variants of Mengo Encephalomyelitis Virus. *Can J Biochem* 51:1521–1526.
23. Goodridge L, Goodridge C, Wu J, Griffiths M, Pawliszyn J. 2004. Isoelectric Point Determination of Norovirus Virus-like Particles by Capillary Isoelectric Focusing with Whole Column Imaging Detection. *Anal Chem* 76:48–52.
24. Aach VH. 1963. Elektrophoretische Untersuchungen an Mutanten des Phagen PhiX174 290–293.
25. Brorson K, Shen H, Lute S, Pérez JS, Frey DD. 2008. Characterization and purification of bacteriophages using chromatofocusing. *J Chromatogr A* 1207:110–121.

26. Horká M, Kubíček O, Růžička F, Holá V, Malinovská I, Šlais K. 2007. Capillary isoelectric focusing of native and inactivated microorganisms. *J Chromatogr A* 1155:164–171.
27. Sinsheimer RL. 1959. Purification and properties of bacteriophage  $\phi$ X174. *J Mol Biol* 1:37–42.
28. Schäfer R, Hinnen R, Franklin RM. 1974. Structure and Synthesis of a Lipid-Containing Bacteriophage: Properties of the Structural Proteins and Distribution of the Phospholipid. *Eur J Biochem* 50:15–27.
29. Brioen P, Thomas AAM, Boeye A. 1985. Lack of quantitative correlation between the neutralization of poliovirus and the antibody-mediated pI shift of the virions. *J Gen Virol* 66:609–613.
30. La Colla P, Marcialis MA, Merreu GP, Loddo B. 1972. Behaviour of a guanidine-dependent strain of poliovirus 1 in sucrose density and pH gradients. *Experientia* 28:1115–1117.
31. Mandel B. 1971. Characterization of type 1 poliovirus by electrophoretic analysis. *Virology* 44:554–568.
32. Ward RL. 1978. Mechanism of poliovirus inactivation by ammonia. *J Virol* 26:299–305.
33. Floyd R, Sharp DG. 1979. Viral aggregation: Buffer effects in the aggregation of poliovirus and reovirus at low and high pH. *Appl Environ Microbiol* 38:395–401.
34. Gallo J, Musil M. 1984. Isoelectric points of red clover necrotic mosaic virus serotypes. *Acta Virol* 28:82–83.
35. Taylor DH, Bosmann HB. 1981. Measurement of the electrokinetic properties of vaccinia and reovirus by laser-illuminated whole-particle microelectrophoresis. *J Virol Methods* 2:251–260.
36. Taylor DH, Bosmann HB. 1981. The electrokinetic properties of reovirus type 3: electrophoretic mobility and zeta potential in dilute electrolytes. *J Colloid Interface Sci* 83:153–162.
37. Magdoff-Fairchild BS. 1967. Electrophoretic and bouyant density variants of southern bean mosaic virus. *Virology* 31:142–153.
38. Honetslegrová J, Petrzik K, Spak J, Pelikánová J. 1994. Comparison of the Czech Scrophularia isolate with the Italian Anagyris strain of scrophularia mottle virus. *Acta Virol* 38:21–24.
39. Oster G. 1951. The isoelectric points of some strains of tobacco mosaic virus. *J Biol Chem* 190:55–59.
40. The UniProt Consortium. 2019. UniProt: a worldwide hub of protein knowledge. *Nucleic Acids Res* 47:D506-515.

41. Grieger JC, Snowdy S, Samulski RJ. 2006. Separate Basic Region Motifs within the Adeno-Associated Virus Capsid Proteins Are Essential for Infectivity and Assembly. *J Virol* 80:5199–5210.
42. Chiorini JA, Yang L, Liu Y, Safer B, Kotin RM. 1997. Cloning of adeno-associated virus type 4 (AAV4) and generation of recombinant AAV4 particles. *J Virol* 71:6823–6833.
43. Suryanarayana S, Rao NA, Murthy MRN, Savithrin HS. 1989. Primary Structure of Belladonna Mottle Virus Coat Protein. *J Biol Chem* 264:6273–6279.
44. Vlček Č, Pačes V. 1986. Nucleotide sequence of the late region of Bacillus phage  $\phi$ 29 completes the 19285-bp sequence of  $\phi$ 29 genome. Comparison with the homologous sequence of phage PZA. *Gene* 46:215–225.
45. Hirofumi Y, Ito J. 1982. Nucleotide sequence of the major early region of bacteriophage  $\phi$ 29. *Gene* 17:323–335.
46. Escarnís C, Salas M. 1982. Nucleotide sequence of the early genes 3 and 4 of bacteriophage  $\phi$ 29. *Nucleic Acids Res* 10:5785–5798.
47. García JA, Méndez E, Salas M. 1984. Cloning, nucleotide sequence and high level expression of the gene coding for the connector protein of Bacillus subtilis phage  $\phi$  29. *Gene* 30:87–98.
48. Xiao F, Moll WD, Guo S, Guo P. 2005. Binding of pRNA to the N-terminal 14 amino acids of connector protein of bacteriophage phi29. *Nucleic Acids Res* 33:2640–2649.
49. Innis CA, Garvey KJ, Ito J. 1986. Nucleotide sequence of phage  $\phi$ 29 gene 7: structure of intergenic spacer between the major early and late genes. *Nucleic Acids Res* 14:7129.
50. Xiang Y, Morais MC, Cohen DN, Bowman VD, Anderson DL, Rossmann MG. 2008. Crystal and cryoEM structural studies of a cell wall degrading enzyme in the bacteriophage  $\phi$ 29 tail. *Proc Natl Acad Sci U S A* 105:9552–9557.
51. Garvey KJ, Saedi MS, Ito J. 1986. Nucleotide sequence of Bacillus phage  $\phi$ 29 genes 14 and 15: homology of gene 15 with other phage lysozymes. *Nucleic Acids Res* 14:10001–10008.
52. Annamalai P, Apte S, Wilkens S, Rao ALN. 2005. Deletion of Highly Conserved Arginine-Rich RNA Binding Motif in Cowpea Chlorotic Mottle Virus Capsid Protein Results in Virion Structural Alterations and RNA Packaging Constraints. *J Virol* 79:3277–3288.
53. Dasgupta R, Kaesberg P. 1982. Complete nucleotide sequences of the coat protein messenger RNAs of brome mosaic virus and cowpea chlorotic mottle virus. *Nucleic Acids Res* 10:703–713.

54. Allison RF, Janda M, Ahlquist P. 1989. Sequence of cowpea chlorotic mottle virus RNAs 2 and 3 and evidence of a recombination event during bromovirus evolution. *Virology* 172:321–330.
55. Owen J, Shintaku M, Aeschleman P, Ben Tahar S, Palukaitis P. 1990. Nucleotide sequence and evolutionary relationships of cucumber mosaic virus (CMV) strains: CMV RNA 3. *J Gen Virol* 71:2243–2249.
56. Simpson AA, Chandrasekar V, Hébert B, Sullivan GM, Rossmann MG, Parrish CR. 2000. Host range and variability of calcium binding by surface loops in the capsids of canine and feline parvoviruses. *J Mol Biol* 300:597–610.
57. Parrish CR, Aquadro CF, Carmichael LE. 1988. Canine host range and a specific epitope map along with variant sequences in the capsid protein gene of canine parvovirus and related feline, mink, and raccoon parvoviruses. *Virology* 166:293–307.
58. Horiuchi M, Goto H, Ishiguro N, Shinagawa M. 1994. Mapping of determinants of the host range for canine cells in the genome of canine parvovirus using canine parvovirus/mink enteritis virus chimeric viruses. *J Gen Virol* 75:1319–1328.
59. Schäfer F, Florin L, Sapp M. 2002. DNA binding of L1 is required for human papillomavirus morphogenesis in vivo. *Virology* 295:172–181.
60. Giri I, Danos O, Yaniv M. 1985. Genomic structure of the cottontail rabbit (Shope) papillomavirus. *Proc Natl Acad Sci U S A* 82:1580–1584.
61. Wang JW, Roden RBS. 2013. L2, the minor capsid protein of papillomavirus. *Virology* 445:175–186.
62. Hughest PJ, North C, Minor PD, Stanway G. 1989. The complete nucleotide sequence of coxsackievirus A21. *J Gen Virol* 70:2943–2952.
63. Zhang G, Wilsden LG, Knowles LNJ, McCauley JW. 1993. Complete nucleotide sequence of a coxsackie B5 virus and its relationship to swine vesicular disease virus. *J Gen Virol* 74:845–853.
64. Adhin MR, Avots A, Berzin V, Overbeek GP, van Duin J. 1990. Complete nucleotide sequence of the group I RNA bacteriophage fr. *Biochim Biophys Acta - Gene Struct Expr* 1050:104–109.
65. Berzin V, Avots A, Jansone I, Gintnere L, Tsimanis A. 1987. Sequence of the genes coding for the A-protein and coat protein of bacteriophage fr. *Nucleic Acids Res* 15:6741.
66. Berzin VM, Avots AI, Iansone I V, Tsimanis AI. 1986. Primary structure of a fragment of cDNA from phage fr. *Bioorg Khim* 12:149–152.
67. Wittmann-Liebold B, Wittmann HG. 1967. Coat proteins of strains of two RNA viruses: Comparison of their amino acid sequences. *Mol*

Gen Genet MGG 100:358–363.

68. INOKUCHI Y, TAKAHASHI R, HIROSE T, INAYAMA S, JACOBSON AB, HIRASHIMA A. 1986. The Complete Nucleotide Sequence of the Group II RNA Coliphage GA1. *J Biochem* 99:1169–1180.
69. Rolfsson Ó, Middleton S, Manfield IW, White SJ, Fan B, Vaughan R, Ranson NA, Dykeman E, Twarock R, Ford J, Cheng Kao C, Stockley PG. 2016. Direct Evidence for Packaging Signal-Mediated Assembly of Bacteriophage MS2. *J Mol Biol* 428:431–448.
70. Shiba T, Suzuki Y. 1981. Localization of A protein in the RNA-A protein complex of RNA phage MS2. *Biochim Biophys Acta - Nucleic Acids Protein Synth* 654:249–255.
71. Vandekerckhove JS, Fiers W, Jou M, Volckaert A, Jou M. 1977. Sequence of the A-Protein of Coliphage sequence of the corresponding. *J Biol Chem* 252:7773–7782.
72. Fiers W, Contreras R, Duerinck F, Haegmean G, Merregaert J, Jou WM, Raeymakers A, Volckaert G, Ysebaert M, Van de Kerckhove J, Nolf F, Van Montagu M. 1975. A-Protein gene of bacteriophage MS2. *Nature* 256:273–278.
73. Spingola M, Peabody DS. 1997. MS2 coat protein mutants which bind Q $\beta$  RNA. *Nucleic Acids Res* 25:2808–2815.
74. Jou WMIN, Haegeman G, Ysebaert M, Fiers W. 1972. Nucleotide Sequence of the Gene Coding for the Bacteriophage MS2 Coat Protein. *Nature* 237:82–88.
75. Inokuchi Y, Jacobson AB, Hirose T, Inayama S, Hirashima A. 1988. Analysis of the complete nucleotide sequence of the group IV RNA coliphage SP. *Nucleic Acids Res* 16:6205–6221.
76. Rumnieks J, Tars K. 2014. Crystal structure of the bacteriophage q $\beta$  coat protein in complex with the rna operator of the replicase gene. *J Mol Biol* 426:1039–1049.
77. Lim F, Spingola M, Peabody DS. 1996. The RNA-binding site of bacteriophage Q $\beta$  coat protein. *J Biol Chem* 271:31839–31845.
78. Maita T, Konigsberg W. 1971. The amino acid sequence of the Qbeta coat protein. *J Biol Chem* 246:5003–5024.
79. Horn WT, Tars K, Grahn E, Helgstrand C, Baron AJ, Lago H, Adams CJ, Peabody DS, Phillips SE V, Stonehouse NJ, Liljas L, Stockley PG. 2006. Structural Basis of RNA Binding Discrimination between Bacteriophages Qbeta and MS2. *Structure* 14:487–495.
80. Kozlovska TM, Cielēns I, Dreilinņa D, Dišlers A, Baumanis V, Ose V, Pumpēns P. 1993. Recombinant rna phage q $\beta$  capsid particles synthesized and self-assembled in escherichia coli. *Gene* 137:133–137.

81. Bacher JM, Bull JJ, Ellington AD. 2003. Evolution of phage with chemically ambiguous proteomes. *BMC Evol Biol* 12:1–12.
82. Friedman SD, Genthner FJ, Gentry J, Sobsey MD, Vinje J, Irol J V. 2009. Gene Mapping and Phylogenetic Analysis of the Complete Genome from 30 Single-Stranded RNA Male-Specific Coliphages ( Family Leviviridae ) □. *J Virol* 83:11233–11243.
83. Domingo-Calap P, Cuevas M, Sanjua R. 2009. The Fitness Effects of Random Mutations in Single-Stranded DNA and RNA Bacteriophages. *PLoS Genet* 5:e1000742.
84. Huttunen P, Santti J, Pulli T, Hyypia T. 1996. The major echovirus group is genetically coherent and related to coxsackie B viruses. *J Gen Virol* 77:715–725.
85. Oberste MS, Maher K, Kilpatrick DR, Pallansch MA. 1999. Molecular evolution of the human enteroviruses: correlation of serotype with VP1 sequence and application to picornavirus classification. *J Virol* 73:1941–1948.
86. Srifah P, Keese P, Weiller G, Gibbs A. 1992. Comparisons of the genomic sequences of erysimum latent virus and other tymoviruses : a search for the molecular basis of their host specificities. *J Gen Virol* 73:1437–1447.
87. Srifah P, Keese P, Shukla D, Gibbs A. 1990. The primary structure of the virion protein gene and encoded protein of erysimum latent tymovirus. *J Gen Virol* 71:3085–3088.
88. Evans VC, Barker G, Heesom KJ, Fan J, Bessant C, Matthews DA. 2012. De novo derivation of proteomes from transcriptomes for transcript and protein identification. *Nat Methods* 9:1207–1211.
89. Chroboczek J, Bieber F, Jacrot B. 1992. The sequence of the genome of adenovirus type 5 and its comparison with the genome of adenovirus type 2. *Virology* 186:280–285.
90. van Beveren CP, Maat J, Dekker BMM, van Ormondt H. 1981. The nucleotide sequence of the gene for protein IVa2 and of the 5' leader segment of the major late mRNAs of adenovirus type 5. *Gene* 16:179–189.
91. Russell WC, Precious B. 1982. Nucleic Acid-binding Properties of Adenovirus Structural Polypeptides. *J Gen Virol* 63:69–79.
92. Kinloch R, Mackay N, Mautner V. 1984. Adenovirus hexon. Sequence comparison of subgroup C serotypes 2 and 5. *J Biol Chem* 259:6431–6436.
93. Chroboczek J, Jacrot B. 1987. The sequence of adenovirus fiber: Similarities and differences between serotypes 2 and 5. *Virology* 161:549–554.

94. Neumann R, Chroboczek J, Jacrot B. 1988. Determination of the nucleotide sequence for the penton-base gene of human adenovirus type 5. *Gene* 69:153–157.
95. Cohen JI, Rosenblum B, Ticehurst JR, Daemer RJ, Feinstone SM, Purcell RH. 1987. Complete nucleotide sequence of an attenuated hepatitis A virus: comparison with wild-type virus. *Proc Natl Acad Sci* 84:2497 LP – 2501.
96. Cohen JI, Ticehurst JR, Purcell RH, Buckler-White A, Baroudy BM. 1987. Complete nucleotide sequence of wild-type hepatitis A virus: comparison with different strains of hepatitis A virus and other picornaviruses. *J Virol* 61:50–59.
97. Lemon SM, Murphy PC, Shields PA, Ping LH, Feinstone SM, Cromeans T, Jansen RW. 1991. Antigenic and genetic variation in cytopathic hepatitis A virus variants arising during persistent infection: evidence for genetic recombination. *J Virol* 65:2056–2065.
98. Skern T, Sommergruber W, Blaas D, Gruendler P, Fraundorfer F, Pieler C, Fogy I, Kuechler E. 1985. Human rhinovirus 2: complete nucleotide sequence and proteolytic processing signals in the capsid protein region. *Nucleic Acids Res* 13:2111–2126.
99. Fata-Hartley CL, Palmenberg AC. 2005. Dipyridamole Reversibly Inhibits Mengovirus RNA Replication. *J Virol* 79:11062 LP – 11070.
100. Krishnaswamy S, Rossmann MG. 1990. Structural refinement and analysis of Mengo virus. *J Mol Biol* 211:803–844.
101. Hardy ME, Estes MK. 1996. Completion of the Norwalk virus genome sequence. *Virus Genes* 12:287–290.
102. Jiang X, Wang M, Wang K, Estes MK. 1993. Sequence and Genomic Organization of Norwalk Virus. *Virology* 195:51–61.
103. Sanger F, Air GM, Barrell BG, Brown NL, Coulson AR, Fiddes JC, Hutchison CA, Slocombe PM, Smith M. 1977. Nucleotide sequence of bacteriophage  $\phi$ X174 DNA. *Nature* 265:687–695.
104. Sanger F, Coulson AR, Friedmann T, Air GM, Barrell BG, Brown NL, Fiddes JC, Hutchison CA, Slocombe PM, Smith M. 1978. The nucleotide sequence of bacteriophage  $\phi$ X174. *J Mol Biol* 125:225–246.
105. Air GM, Coulson AR, Fiddes JC, Friedmann T, Hutchison CA, Sanger F, Slocombe PM, Smith AJH. 1978. Nucleotide sequence of the F protein coding region of bacteriophage  $\phi$ X174 and the amino acid sequence of its product. *J Mol Biol* 125:247–254.
106. Air GM. 1976. Amino acid sequences from the gene F(Capsid) protein of bacteriophage  $\phi$ X174. *J Mol Biol* 107:433–443.
107. Air GM, Sanger F, Coulson AR. 1976. Nucleotide and amino acid sequences of gene G of  $\phi$ X174. *J Mol Biol* 108:519–533.
108. Air GM, Blackburn EH, Sanger F, Coulson AR. 1975. The nucleotide and amino acid sequences of the N (5') terminal region of gene G of



- bacteriophage  $\phi$ X174. *J Mol Biol* 96:703–719.
109. Bernal RA, Hafenstein S, Esmeralda R, Fane BA, Rossmann MG. 2004. The  $\phi$ X174 protein J mediates DNA packaging and viral attachment to host cells. *J Mol Biol* 337:1109–1122.
110. Freymeyer DK, Shank PR, Edgell MH, Hutchison CA, Vanaman TC. 1977. Amino acid sequence of the small core protein from bacteriophage  $\phi$ X174. *Biochemistry* 16:4550–4556.
111. HINNEN R, CHASSIN R, SCHAFFER R, FRANKLIN RM, HITZ H, SCHAFFER D. 1976. Structure and Synthesis of a Lipid-Containing Bacteriophage. *Eur J Biochem* 68:139–152.
112. Kivelä HM, Männistö RH, Kalkkinen N, Bamford DH. 1999. Purification and protein composition of PM2, the first lipid-containing bacterial virus to be isolated. *Virology* 262:364–374.
113. Männistö RH, Kivelä HM, Paulin L, Bamford DH, Bamford JKH. 1999. The Complete Genome Sequence of PM2, the First Lipid-Containing Bacterial Virus To Be Isolated. *Virology* 262:355–363.
114. Marcoli R, Pirrotta V, Franklin RM. 1979. Interaction Between Bacteriophage PM2 Protein IV and DNA. *J Mol Biol* 131:107–131.
115. Miller FD, Winkfein RJ, Rattner JB, Van de Sande JH. 1984. Sequence analysis of a PM2-DNA anti-Z-IgG-binding region. *Biosci Rep* 4:885–895.
116. Abrescia NGA, Grimes JM, Kivelä HM, Assenberg R, Sutton GC, Butcher SJ, Bamford JKH, Bamford DH, Stuart DI. 2008. Insights into virus evolution and membrane biogenesis from the structure of the marine lipid-containing bacteriophage PM2. *Mol Cell* 31:749–761.
117. Racaniello VR, Baltimore D. 1981. Molecular cloning of poliovirus cDNA and determination of the complete nucleotide sequence of the viral genome. *Proc Natl Acad Sci* 78:4887 LP – 4891.
118. Kitamura N, Semler BL, Rothberg PG, Larsen GR, Adler CJ, Dorner AJ, Emini EA, Hanecak R, Lee JJ, van der Werf S, Anderson CW, Wimmer E. 1981. Primary structure, gene organization and polypeptide expression of poliovirus RNA. *Nature* 291:547–553.
119. Kitamura N, Adler CJ, Rothberg PG, Martinko J, Nathenson SG, Wimmer E. 1980. The genome-linked protein of picornaviruses. VII. Genetic mapping of poliovirus VPg by protein and RNA sequence studies. *Cell* 21:295–302.
120. Ansardi DC, Luo M, Morrow CD. 1994. Mutations in the poliovirus P1 capsid precursor at arginine residues VP4-ARG34, VP3-ARG223, and VP1-ARG129 affect virus assembly and encapsidation of genomic RNA. *Virology* 199:20–34.

121. Saren A-M, Ravantti JJ, Benson SD, Burnett RM, Paulin L, Bamford DH, Bamford JKH. 2005. A Snapshot of Viral Evolution from Genome Analysis of the Tectiviridae Family. *J Mol Biol* 350:427–440.
122. Savilahti H, Bamford DH. 1987. The complete nucleotide sequence of the left very early region of Escherichia coli bacteriophage PRD1 coding for the terminal protein and the DNA polymerase. *Gene* 57:121–130.
123. Hsieh J-C, Jung G, Leavitt MC, Ito J. 1987. Primary structure of the DNA terminal protein of bacteriophage PRD1. *Nucleic Acids Res* 15:8999–9009.
124. Bamford JKH, Hänninen A-L, Pakula TM, Ojala PM, Kalkkinen N, Frilander M, Bamford DH. 1991. Genome organization of membrane-containing bacteriophage PRD1. *Virology* 183:658–676.
125. Pakula TM, Savilahti H, Bamford DH. 1989. Comparison of the amino acid sequence of the lytic enzyme from broad-host-range bacteriophage PRD1 with sequences of other cell-wall-peptidoglycan lytic enzymes. *Eur J Biochem* 180:149–152.
126. Hong C, Oksanen HM, Liu X, Jakana J, Bamford DH, Chiu W. 2014. A Structural Model of the Genome Packaging Process in a Membrane-Containing Double Stranded DNA Virus. *PLoS Biol* 12.
127. Bamford JKH, Bamford DH. 1990. Capsomer proteins of bacteriophage PRD1, a bacterial virus with a membrane. *Virology* 177:445–451.
128. Caldentey J, Tuma R, Bamford DH. 2000. Assembly of bacteriophage PRD1 spike complex: Role of the multidomain protein P5. *Biochemistry* 39:10566–10573.
129. Park S-H, Sit TL, Kim K-H, Lommel SA. 2013. The red clover necrotic mosaic virus capsid protein N-terminal amino acids possess specific RNA binding activity and are required for stable virion assembly. *Virus Res* 176:107–118.
130. Park SH, Sit TL, Kim KH, Lommel SA. 2012. The Red clover necrotic mosaic virus capsid protein N-terminal lysine-rich motif is a determinant of symptomatology and virion accumulation. *Mol Plant Pathol* 13:744–754.
131. Xiong Z, Lommel SA. 1989. The complete nucleotide sequence and genome organization of red clover necrotic mosaic virus RNA-1. *Virology* 171:543–554.
132. Reinisch KM, Nibert ML, Harrison SC. 2000. Structure of the reovirus core at 3.6 Å resolution. *Nature* 404:960–967.
133. Liemann S, Chandran K, Baker TS, Nibert ML, Harrison SC. 2002. Structure of the reovirus membrane-penetration protein,  $\mu$ 1, in a complex with its protector protein,  $\sigma$ 3. *Cell* 108:283–295.

134. Kobayashi T, Antar AAR, Boehme KW, Danthi P, Eby EA, Guglielmi KM, Holm GH, Johnson EM, Maginnis MS, Naik S, Skelton WB, Wetzel JD, Wilson GJ, Chappell JD, Dermody TS. 2007. A Plasmid-Based Reverse Genetics System for Animal Double-Stranded RNA Viruses. *Cell Host Microbe* 1:147–157.
135. Dermody TS, Schiff LA, Nibert ML, Coombs KM, Fields BN. 1991. The S2 gene nucleotide sequences of prototype strains of the three reovirus serotypes: characterization of reovirus core protein sigma 2. *J Virol* 65:5721–5731.
136. Cashdollar LW, Esparza J, Hudson GR, Chmelo R, Lee PW, Joklik WK. 1982. Cloning the double-stranded RNA genes of reovirus: sequence of the cloned S2 gene. *Proc Natl Acad Sci* 79:7644 LP – 7648.
137. Wiener JR, McLaughlin T, Joklik WK. 1989. The sequences of the S2 genome segments of reovirus serotype 3 and of the dsRNA-negative mutant ts447. *Virology* 170:340–341.
138. Ebert DH, Wetzel JD, Brumbaugh DE, Chance SR, Stobie LE, Baer GS, Dermody TS. 2001. Adaptation of Reovirus to Growth in the Presence of Protease Inhibitor E64 Segregates with a Mutation in the Carboxy Terminus of Viral Outer-Capsid Protein  $\zeta$ 3. *J Virol* 75:3197 LP – 3206.
139. Giantini M, Seliger LS, Furuichi Y, Shatkin AJ. 1984. Reovirus type 3 genome segment S4: nucleotide sequence of the gene encoding a major virion surface protein. *J Virol* 52:984–987.
140. Duncan R, Horne D, William Cashdollar L, Joklik WK, Lee PWK. 1990. Identification of conserved domains in the cell attachment proteins of the three serotypes of reovirus. *Virology* 174:399–409.
141. Bassel-Duby R, Jayasuriya A, Chatterjee D, Sonenberg N, Maizel J V, Fields BN. 1985. Sequence of reovirus haemagglutinin predicts a coiled-coil structure. *Nature* 315:421–423.
142. Nagata L, Masri SA, Mah DCW, Lee PWK. 1984. Molecular cloning and sequencing of the reovirus (serotype 3) S1 gene which encodes the viral cell attachment protein  $\sigma$ 1. *Nucleic Acids Res* 12:8699–8710.
143. Cashdollar LW, Chmelo RA, Wiener JR, Joklik WK. 1985. Sequences of the S1 genes of the three serotypes of reovirus. *Proc Natl Acad Sci* 82:24 LP – 28.
144. Wiener JR, Joklik WK. 1989. The sequences of the reovirus serotype 1, 2, and 3 L1 genome segments and analysis of the mode of divergence of the reovirus serotypes. *Virology* 169:194–203.

145. Jayasuriya AK, Nibert ML, Fields BN. 1988. Complete nucleotide sequence of the M2 gene segment of reovirus type 3 dearing and analysis of its protein product  $\mu$ 1. *Virology* 163:591–602.
146. Tarlow O, McCorquodale JG, McCrae MA. 1988. Molecular cloning and sequencing of the gene (M2) encoding the major virion structural protein ( $\mu$ 1- $\mu$ 1C) of serotypes 1 and 3 of mammalian reovirus. *Virology* 164:141–146.
147. Luongo CL, Reinisch KM, Harrison SC, Nibert ML. 2000. Identification of the guanylyltransferase region and active site in reovirus mRNA capping protein lambda2. *J Biol Chem* 275:2804–2810.
148. Seliger LS, Zheng K, Shatkin AJ. 1987. Complete nucleotide sequence of reovirus L2 gene and deduced amino acid sequence of viral mRNA guanylyltransferase. *J Biol Chem* 262:16289–16293.
149. Wiener JR, Bartlett JA, Joklik WK. 1989. The sequences of reovirus serotype 3 genome segments M1 and M3 encoding the minor protein  $\mu$ 2 and the major nonstructural protein  $\mu$ NS, respectively. *Virology* 169:293–304.
150. Parker JSL, Broering TJ, Kim J, Higgins DE, Nibert ML. 2002. Reovirus Core Protein  $\mu$ 2 Determines the Filamentous Morphology of Viral Inclusion Bodies by Interacting with and Stabilizing Microtubules. *J Virol* 76:4483 LP – 4496.
151. Yin P, Keirstead ND, Broering TJ, Arnold MM, Parker JSL, Nibert ML, Coombs KM. 2004. Comparisons of the M1 genome segments and encoded  $\mu$ 2 proteins of different reovirus isolates. *Virol J* 1:6.
152. Bartlett JA, Joklik WK. 1988. The sequence of the reovirus serotype 3 L3 genome segment which encodes the major core protein lambda 1. *Virology* 167:31–37.
153. Harrison SJ, Farsetta DL, Kim J, Noble S, Broering TJ, Nibert ML. 1999. Mammalian reovirus L3 gene sequences and evidence for a distinct amino-terminal region of the lambda1 protein. *Virology* 258:54–64.
154. Lee L, Anderson EJ. 1998. Nucleotide sequence of a resistance breaking mutant of southern bean mosaic virus. *Arch Virol* 143:2189–2201.
155. Koenig R, Pleij CWA, Lesemann D-E, Loss S, Vetten HJ. 2005. Molecular characterization of isolates of anagyris vein yellowing virus, plantago mottle virus and scrophularia mottle virus -- comparison of various approaches for tymovirus classification. *Arch Virol* 150:2325–2338.
156. Small C, Barro M, Brown TL, Patton JT. 2007. Genome heterogeneity of SA11 rotavirus due to reassortment with “O” agent. *Virology* 359:415–424.

157. Patton JT, Jones MT, Kalbach AN, He YW, Xiaobo J. 1997. Rotavirus RNA polymerase requires the core shell protein to synthesize the double-stranded RNA genome. *J Virol* 71:9618–9626.
158. Nozu Y, Ono T, Okada Y. 1970. Amino acid sequences of some common Japanese strains of tobacco mosaic virus. *J Biochem* 68:39–52.
159. Guilley H, Jonard G, Kukla B, Richards KE. 1979. Sequence of 1000 nucleotides at the 3' end of tobacco mosaic virus RNA. *Nucleic Acids Res* 6:1287–1308.
160. FUNATSU G, TSUGITA A, FRAENKEL-CONRAT H. 1964. STUDIES ON THE AMINO ACID SEQUENCE OF TOBACCO MOSAIC VIRUS PROTEIN. V. AMINO ACID SEQUENCES OF TWO PEPTIDES FROM TRYPTIC DIGESTS AND LOCATION OF AMIDE GROUP. *Arch Biochem Biophys* 105:25–41.
161. Anderer FA, Wittmann-Liebold B, Wittmann HG. 1965. [Further studies on amino acid sequence of proteins in tobacco mosaic virus]. *Zeitschrift fur Naturforschung Tl B, Chemie, Biochem Biophys Biol und verwandte Gebiete* 20:1203–1213.
162. Tsugita A, Gish DT, Young J, Fraenkel-Conrat H, Knight CA, Stanley WM. 1960. THE COMPLETE AMINO ACID SEQUENCE OF THE PROTEIN OF TOBACCO MOSAIC VIRUS. *Proc Natl Acad Sci U S A* 46:1463–1469.
163. Goelet P, Lomonosoff GP, Butler PJ, Akam ME, Gait MJ, Karn J. 1982. Nucleotide sequence of tobacco mosaic virus RNA. *Proc Natl Acad Sci* 79:5818 LP – 5822.
164. Bink HHJ, Roepan SK, Pleij CWA. 2004. Two histidines of the coat protein of turnip yellow mosaic virus at the capsid interior are crucial for viability. *Proteins Struct Funct Bioinforma* 55:236–244.
165. Ehresmann B, Briand J -P, Reinbolt J, Witz J. 1980. Identification of Binding Sites of Turnip Yellow Mosaic Virus Protein and RNA by Crosslinks Induced in situ. *Eur J Biochem* 108:123–129.
166. Guilley H, Briand JP. 1978. Nucleotide sequence of turnip yellow mosaic virus coat protein mRNA. *Cell* 15:113–122.
167. Briand JP, Jonard G, Guilley H, Richards K, Hirth L. 1977. Nucleotide sequence (n=159) of the amino-acid-accepting 3'-OH extremity of turnip-yellow-mosaic-virus RNA and the last portion of its coat-protein cistron. *Eur J Biochem* 72:453–463.
168. Silberklang M, Prochiantz A, Haenni AL, Rajbhandary UL. 1977. Studies on the sequence of the 3'-terminal region of turnip-yellow-mosaic-virus RNA. *Eur J Biochem* 72:465–478.
169. Dreher TW, Bransom KL. 1992. Genomic RNA sequence of turnip yellow mosaic virus isolate TYMC, a cDNA-based clone with verified

infectivity. *Plant Mol Biol* 18:403–406.

170. Morch M-D, Drugeon G, Benicourt C. 1982. Analysis of the in vitro coding properties of the 3' region of turnip yellow mosaic virus genomic RNA. *Virology* 119:193–198.
171. Stehelin D, Peter R, Duranton H. 1973. Studies on the primary structure of turnip yellow mosaic virus protein. III. Primary structure of the chymotryptic peptides of aminoethylated protein. Complete sequence. *Biochim Biophys Acta* 317:253–265.
172. Testut P, Renard CA, Terradillos O, Vitvitski-Trepo L, Tekaiia F, Degott C, Blake J, Boyer B, Buendia MA. 1996. A new hepadnavirus endemic in arctic ground squirrels in Alaska. *J Virol* 70:4210–4219.
173. Williams AK, Wang L, Sneed LS, Collisson EW. 1996. Nucleocapsid gene sequence analysis of several strains of infectious bronchitis virus describing the evolutionary relationship of IBV within the coronaviridae family. EMBL/GenBank/DDBJ Nucleotide Sequence.
174. Pecenková T, Benes V, Paces J, Vlcek C, Paces V. 1997. Bacteriophage B103: complete DNA sequence of its genome and relationship to other *Bacillus* phages. *Gene* 199:157–163.
175. Leavitt MC, Ito J. 1987. Nucleotide sequence of *Bacillus* phage Nf terminal protein gene. *Nucleic Acids Res* 15:5251–5259.
176. Mizukami Y, Sekiya T, Hirokawa H. 1986. Nucleotide sequence of gene F of *Bacillus* phage Nf. *Gene* 42:231–235.
177. Tang XC, Zhang JX, Zhang SY, Wang P, Fan XH, Li LF, Li G, Dong BQ, Liu W, Cheung CL, Xu KM, Song WJ, Vijaykrishna D, Poon LLM, Peiris JSM, Smith GJD, Chen H, Guan Y. 2006. Prevalence and genetic diversity of coronaviruses in bats from China. *J Virol* 80:7481–7490.
178. Bassami MR, Berryman D, Wilcox GE, Raidal SR. 1998. Psittacine beak and feather disease virus nucleotide sequence analysis and its relationship to porcine circovirus, plant circoviruses, and chicken anaemia virus. *Virology* 249:453–459.
179. Chouljenko VN, Lin XQ, Storz J, Kousoulas KG, Gorbalenya AE. 2001. Comparison of genomic and predicted amino acid sequences of respiratory and enteric bovine coronaviruses isolated from the same animal with fatal shipping pneumonia. *J Gen Virol* 82:2927–2933.
180. Todd D, Weston J, Ball NW, Borghmans BJ, Smyth JA, Gelmini L, Lavazza A. 2001. Nucleotide sequence-based identification of a novel circovirus of canaries. *Avian Pathol* 30:321–325.
181. Sanchez-Morgado JM, Poynter S, Morris TH. 2004. Molecular characterization of a virulent canine coronavirus BGF strain. *Virus Res* 104:27–31.

182. Noteborn MH, de Boer GF, van Roozelaar DJ, Karreman C, Kranenburg O, Vos JG, Jeurissen SH, Hoeben RC, Zantema A, Koch G. 1991. Characterization of cloned chicken anemia virus DNA that contains all elements for the infectious replication cycle. *J Virol* 65:3131–3139.
183. Meehan BM, Todd D, Creelan JL, Earle JA, Hoey EM, McNulty MS. 1992. Characterization of viral DNAs from cells infected with chicken anaemia agent: sequence analysis of the cloned replicative form and transfection capabilities of cloned genome fragments. *Arch Virol* 124:301–319.
184. Vaudin M, Wolstenholme AJ, Tsiquaye KN, Zuckerman AJ, Harrison TJ. 1988. The complete nucleotide sequence of the genome of a hepatitis B virus isolated from a naturally infected chimpanzee. *J Gen Virol* 69 ( Pt 6):1383–1389.
185. Weber K, Konigsberg W. 1967. Amino acid sequence of the f2 coat protein. *J Biol Chem* 242:3563–3578.
186. Nichols JL, Robertson HD. 1971. Sequences of RNA fragments from the bacteriophage f2 coat protein cistron which differ from their R17 counterparts. *Biochim Biophys Acta* 228:676–681.
187. Adhin MR, Hirashima A, van Duin J. 1989. Nucleotide sequence from the ssRNA bacteriophage JP34 resolves the discrepancy between serological and biophysical classification. *Virology* 170:238–242.
188. Beekwilder J, Nieuwenhuizen R, Poot R, van Duin J. 1996. Secondary structure model for the first three domains of Q beta RNA. Control of A-protein synthesis. *J Mol Biol* 256:8–19.
189. Beekwilder MJ, Nieuwenhuizen R, van Duin J. 1995. Secondary structure model for the last two domains of single-stranded RNA phage Q beta. *J Mol Biol* 247:903–917.
190. Weber K. 1967. Amino acid sequence studies on the tryptic peptides of the coat protein of the bacteriophage R17. *Biochemistry* 6:3144–3154.
191. Nishihara T, Fujisaki S, Nishimura Y, Minami Y, Yubisui T. 2006. Analysis of six new genes encoding lysis proteins and coat proteins in *Escherichia coli* group A RNA phages. *Microbiol Immunol* 50:61–66.
192. Nishihara T, Nozu Y, Okada Y. 1970. Amino acid sequence of the coat protein of the RNA phage ZR. *J Biochem* 67:403–413.
193. Guy JS, Breslin JJ, Breuhaus B, Vivrette S, Smith LG. 2000. Characterization of a coronavirus isolated from a diarrheic foal. *J Clin Microbiol* 38:4523–4526.
194. Makino S, Chang MF, Shieh CK, Kamahora T, Vannier DM, Govindarajan S, Lai MM. 1987. Molecular cloning and sequencing of a

human hepatitis delta (delta) virus RNA. *Nature* 329:343–346.

195. Engler JA, van Bree MP. 1982. The nucleotide sequence of the gene encoding protein IVa2 in human adenovirus type 7. *Gene* 19:71–80.
196. Gingeras TR, Sciaky D, Gelinas RE, Bing-Dong J, Yen CE, Kelly MM, Bullock PA, Parsons BL, O'Neill KE, Roberts RJ. 1982. Nucleotide sequences from the adenovirus-2 genome. *J Biol Chem* 257:13475–13491.
197. Thiel V, Herold J, Schelle B, Siddell SG. 2001. Infectious RNA transcribed in vitro from a cDNA copy of the human coronavirus genome cloned in vaccinia virus. *J Gen Virol* 82:1273–1281.
198. Myint S, Harmsen D, Raabe T, Siddell SG. 1990. Characterization of a nucleic acid probe for the diagnosis of human coronavirus 229E infections. *J Med Virol* 31:165–172.
199. Schreiber SS, Kamahora T, Lai MM. 1989. Sequence analysis of the nucleocapsid protein gene of human coronavirus 229E. *Virology* 169:142–151.
200. Ushijima Y, Luo C, Goshima F, Yamauchi Y, Kimura H, Nishiyama Y. 2007. Determination and analysis of the DNA sequence of highly attenuated herpes simplex virus type 1 mutant HF10, a potential oncolytic virus. *Microbes Infect* 9:142–149.
201. McGeoch DJ, Dalrymple MA, Davison AJ, Dolan A, Frame MC, McNab D, Perry LJ, Scott JE, Taylor P. 1988. The complete DNA sequence of the long unique region in the genome of herpes simplex virus type 1. *J Gen Virol* 69 ( Pt 7):1531–1574.
202. Dolan A, Jamieson FE, Cunningham C, Barnett BC, McGeoch DJ. 1998. The genome sequence of herpes simplex virus type 2. *J Virol* 72:2010–2021.
203. Alizon M, Wain-Hobson S, Montagnier L, Sonigo P. 1986. Genetic variability of the AIDS virus: nucleotide sequence analysis of two isolates from African patients. *Cell* 46:63–74.
204. Guan Y, Zheng BJ, He YQ, Liu XL, Zhuang ZX, Cheung CL, Luo SW, Li PH, Zhang LJ, Guan YJ, Butt KM, Wong KL, Chan KW, Lim W, Shortridge KF, Yuen KY, Peiris JSM, Poon LLM. 2003. Isolation and characterization of viruses related to the SARS coronavirus from animals in southern China. *Science* 302:276–278.
205. Tsui SKW, Chim SSC, Lo YMD. 2003. Coronavirus genomic-sequence variations and the epidemiology of the severe acute respiratory syndrome. *N Engl J Med*. United States.
206. Marra MA, Jones SJM, Astell CR, Holt RA, Brooks-Wilson A, Butterfield YSN, Khattra J, Asano JK, Barber SA, Chan SY, Cloutier A,



- Coughlin SM, Freeman D, Girn N, Griffith OL, Leach SR, Mayo M, McDonald H, Montgomery SB, Pandoh PK, Petrescu AS, Robertson AG, Schein JE, Siddiqui A, Smailus DE, Stott JM, Yang GS, Plummer F, Andonov A, Artsob H, Bastien N, Bernard K, Booth TF, Bowness D, Czup M, Drebot M, Fernando L, Flick R, Garbutt M, Gray M, Grolla A, Jones S, Feldmann H, Meyers A, Kabani A, Li Y, Normand S, Stroher U, Tipples GA, Tyler S, Vogrig R, Ward D, Watson B, Brunham RC, Kraiden M, Petric M, Skowronski DM, Upton C, Roper RL. 2003. The Genome sequence of the SARS-associated coronavirus. *Science* 300:1399–1404.
207. Zeng FY, Chan CWM, Chan MN, Chen JD, Chow KYC, Hon CC, Hui KH, Li J, Li VYY, Wang CY, Wang PY, Guan Y, Zheng B, Poon LLM, Chan KH, Yuen KY, Peiris JSM, Leung FC. 2003. The complete genome sequence of severe acute respiratory syndrome coronavirus strain HKU-39849 (HK-39). *Exp Biol Med (Maywood)* 228:866–873.
208. Rota PA, Oberste MS, Monroe SS, Nix WA, Campagnoli R, Icenogle JP, Peñaranda S, Bankamp B, Maher K, Chen M-H, Tong S, Tamin A, Lowe L, Frace M, DeRisi JL, Chen Q, Wang D, Erdman DD, Peret TCT, Burns C, Ksiazek TG, Rollin PE, Sanchez A, Liffick S, Holloway B, Limor J, McCaustland K, Olsen-Rasmussen M, Fouchier R, Günther S, Osterhaus ADME, Drosten C, Pallansch MA, Anderson LJ, Bellini WJ. 2003. Characterization of a novel coronavirus associated with severe acute respiratory syndrome. *Science* 300:1394–1399.
209. Ruan YJ, Wei CL, Ee AL, Vega VB, Thoreau H, Su STY, Chia J-M, Ng P, Chiu KP, Lim L, Zhang T, Peng CK, Lin EOL, Lee NM, Yee SL, Ng LFP, Chee RE, Stanton LW, Long PM, Liu ET. 2003. Comparative full-length genome sequence analysis of 14 SARS coronavirus isolates and common mutations associated with putative origins of infection. *Lancet (London, England)* 361:1779–1785.
210. Huiet L, Klaassen V, Tsai JH, Falk BW. 1991. Nucleotide sequence and RNA hybridization analyses reveal an ambisense coding strategy for maize stripe virus RNA3. *Virology* 182:47–53.
211. Bermingham A, Chand MA, Brown CS, Aarons E, Tong C, Langrish C, Hoschler K, Brown K, Galiano M, Myers R, Pebody RG, Green HK, Boddington NL, Gopal R, Price N, Newsholme W, Drosten C, Fouchier RA, Zambon M. 2012. Severe respiratory illness caused by a novel coronavirus, in a patient transferred to the United Kingdom from the Middle East, September 2012. *Euro Surveill Bull Eur sur les Mal Transm = Eur Commun Dis Bull* 17:20290.
212. Cheung AK. 2003. Transcriptional analysis of porcine circovirus type 2. *Virology* 305:168–180.
213. Hamel AL, Lin LL, Nayar GP. 1998. Nucleotide sequence of porcine circovirus associated with postweaning multisystemic wasting syndrome in pigs. *J Virol* 72:5262–5267.

214. Bridgen A, Duarte M, Tobler K, Laude H, Ackermann M. 1993. Sequence determination of the nucleocapsid protein gene of the porcine epidemic diarrhoea virus confirms that this virus is a coronavirus related to human coronavirus 229E and porcine transmissible gastroenteritis virus. *J Gen Virol* 74 ( Pt 9):1795–1804.
215. Duarte M, Tobler K, Bridgen A, Rasschaert D, Ackermann M, Laude H. 1994. Sequence analysis of the porcine epidemic diarrhea virus genome between the nucleocapsid and spike protein genes reveals a polymorphic ORF. *Virology* 198:466–476.
216. Kocherhans R, Bridgen A, Ackermann M, Tobler K. 2001. Completion of the porcine epidemic diarrhoea coronavirus (PEDV) genome sequence. *Virus Genes* 23:137–144.
217. Sasseville AM-J, Boutin M, Gélinas A-M, Dea S. 2002. Sequence of the 3'-terminal end (8.1 kb) of the genome of porcine haemagglutinating encephalomyelitis virus: comparison with other haemagglutinating coronaviruses. *J Gen Virol* 83:2411–2416.
218. Britton P, Cármenes RS, Page KW, Garwes DJ, Parra F. 1988. Sequence of the nucleoprotein gene from a virulent British field isolate of transmissible gastroenteritis virus and its expression in *Saccharomyces cerevisiae*. *Mol Microbiol* 2:89–99.
219. Ikegami T, Calaor AB, Miranda ME, Niikura M, Saijo M, Kurane I, Yoshikawa Y, Morikawa S. 2001. Genome structure of Ebola virus subtype Reston: differences among Ebola subtypes. Brief report. *Arch Virol* 146:2021–2027.
220. Suzuki N. 1993. In vitro translation of rice dwarf phytoeovirus genome segments S4 to S10. *Arch Virol* 130:201–208.
221. Moriyasu Y, Maruyama-Funatsuki W, Kikuchi A, Ichimi K, Zhong B, Yan J, Zhu Y, Suga H, Watanabe Y, Ichiki-Uehara T, Shimizu T, Hagiwara K, Kamiunten H, Akutsu K, Omura T. 2007. Molecular analysis of the genome segments S1, S4, S6, S7 and S12 of a Rice gall dwarf virus isolate from Thailand; completion of the genomic sequence. *Arch Virol* 152:1315–1322.
222. Kakutani T, Hayano Y, Hayashi T, Minobe Y. 1991. Ambisense segment 3 of rice stripe virus: the first instance of a virus containing two ambisense segments. *J Gen Virol* 72 ( Pt 2):465–468.
223. Hayano Y, Kakutani T, Hayashi T, Minobe Y. 1990. Coding strategy of rice stripe virus: major nonstructural protein is encoded in viral RNA segment 4 and coat protein in RNA complementary to segment 3. *Virology* 177:372–374.
224. Ysebaert M, van Emmelo J, Fiers W. 1980. Total nucleotide sequence of a nearly full-size DNA copy of satellite tobacco necrosis virus RNA. *J Mol Biol* 143:273–287.
225. Fiers W, Contreras R, Haegemann G, Rogiers R, Van de Voorde A, Van Heuverswyn H, Van Herreweghe J, Volckaert G, Ysebaert M.

1978. Complete nucleotide sequence of SV40 DNA. *Nature* 273:113–120.
226. Reddy VB, Thimmappaya B, Dhar R, Subramanian KN, Zain BS, Pan J, Ghosh PK, Celma ML, Weissman SM. 1978. The genome of simian virus 40. *Science* 200:494–502.
227. Breslin JJ, Smith LG, Fuller FJ, Guy JS. 1999. Sequence analysis of the turkey coronavirus nucleocapsid protein gene and 3' untranslated region identifies the virus as a close relative of infectious bronchitis virus. *Virus Res* 65:187–193.
228. Breslin JJ, Smith LG, Fuller FJ, Guy JS. 1999. Sequence analysis of the matrix/nucleocapsid gene region of turkey coronavirus. *Intervirology* 42:22–29.
229. Seifers DL, Harvey TL, Martin TJ, Haber S, She YM, Ens W, Standing KG, Solomon R, Gera A. 2005. Association of a virus with wheat displaying yellow head disease symptoms in the great plains. *Plant Dis* 89:888—895.
230. Hillman BI, Anzola J V, Halpern BT, Cavileer TD, Nuss DL. 1991. First field isolation of wound tumor virus from a plant host: minimal sequence divergence from the type strain isolated from an insect vector. *Virology* 185:896–900.
231. Klausen MS, Jespersen MC, Nielsen H, Jensen KK, Jurtz VI, Sønderby CK, Sommer MOA, Winther O, Nielsen M, Petersen B, Marcatili P. 2019. NetSurfP-2.0: Improved prediction of protein structural features by integrated deep learning. *Proteins Struct Funct Bioinforma* 87:520–527.
232. DTU Health Tech. 2019. NetSurfP. 2.0. [www.cbs.dtu.dk/services/NetSurfP](http://www.cbs.dtu.dk/services/NetSurfP).

Proteome sequences and associated polynucleotide-binding region (PBR) predictions. Notation above the sequence indicates positive PBR prediction for the corresponding (below) residue, based on conserved structures: Beta sheets ('S'), Beta turns ('U'), Disordered termini ('D'), and arginine (ARG) rich ('R').

Adeno-associated virus 4

Major capsid, 1 variant of 3 (VP1) | O41855

Beta sheet  
Beta turn  
Disordered termini DDDDDDDDDDDDDDDDDDDDDDDDDDDDDDDDDDDDDDDDDDDDDDDDDDDDDDDDDDDDDDDDD  
ARG rich  
1 MTDGYLPDWLEDNLSEGVREWWALQPGAPKPKANQQHQDNARGLVLPGYKYLPGNGLDK 60

Beta sheet  
Beta turn  
Disordered termini DDDDDDDDDDDDDDDDDDDDDDDDDDDDDDDDDDDDDDDDDDDDDDDDDDDDDDDDDDDDDDDDD  
ARG rich  
61 GEPVNAADAAALEHDKAYDQQLKAGDNPLYKYNHADAQFQQLQGDTSFGGNLGRAVFQA 120

Beta sheet  
Beta turn  
Disordered termini DDDDDDDDDDDDDDDDDDDDDDDDDDDDDDDDDDDDDDDDDDDDDDDDDDDDDDDDDDDDDDD  
ARG rich RRRRRRRRRR  
121 KKRVLPLGLVEQAGETAPGKKRPLIESPQQPDSSTGIGKKGKQPAKKLVFEDETGAGD 180

Beta sheet  
Beta turn  
Disordered termini DDDDDDDDDDDDDDDDDDDDDDDDDDDDDDDDDDDDDDDDDDDDDDDDDDDDDDDDDDDDDDD  
ARG rich  
181 GPPEGSTSGAMSDDSEMRAAAGGAAVEGGQGADGVDGNASGDWHCDSTWSEGHVTTTSTRT 240  
SSSSS

Beta sheet  
Beta turn  
Disordered termini DDDDDDDDDDDDDDDDDDDDDDDDDDDDDDDDDDDDDDDDDDDDDDDDDDDDDDDDDDDDDDD  
ARG rich  
241 WVLPTYNNHLYKRLGESLQSNITYNGFSTPWGYDFNRFHCHFSPRDWQRLINNNWGMRPK 300  
SSSSSSSSSSSSSSS

Beta sheet  
Beta turn  
Disordered termini DDDDDDDDDDDDDDDDDDDDDDDDDDDDDDDDDDDDDDDDDDDDDDDDDDDDDDDDDDDDDDD  
ARG rich  
301 AMRVKIFNIQVKEVTTSSNGETTVANNLTSTVQIFADSSYELPYVMDAGQEGSLPPFPNDV 360  
UUUUU

Beta sheet  
Beta turn  
Disordered termini DDDDDDDDDDDDDDDDDDDDDDDDDDDDDDDDDDDDDDDDDDDDDDDDDDDDDDDDDDDDDDD  
ARG rich  
361 FMVPQYGYCGLVGTGNTSQQTDRNAFYCLEYFPSQMLRTGNNFEITYSFEKVPFHSMYAH 420  
UU

Beta sheet  
Beta turn  
Disordered termini DDDDDDDDDDDDDDDDDDDDDDDDDDDDDDDDDDDDDDDDDDDDDDDDDDDDDDDDDDDDDDD  
ARG rich  
421 SQSLDRLMNPLIDQYLWGLQSTTTGTTLNAGTATTNFKLRPTNFSNFKNWLPGPSIKQ 480

Beta sheet  
Beta turn  
Disordered termini DDDDDDDDDDDDDDDDDDDDDDDDDDDDDDDDDDDDDDDDDDDDDDDDDDDDDDDDDDDDDDD  
ARG rich  
481 QGFSKTANQNYKIPATGSDSLIKYETHSTLDGRWSALTPGPPMATAGPADSKFSNSQLIF 540

Beta sheet  
Beta turn  
Disordered termini DDDDDDDDDDDDDDDDDDDDDDDDDDDDDDDDDDDDDDDDDDDDDDDDDDDDDDDDDDDDDDD  
ARG rich  
541 AGPKQNGNTATVPGTLIFTSEEELAATNATDMDWGNLPGGDQSNLPTVDRLTALGAV 600  
UU

Beta sheet  
Beta turn  
Disordered termini DDDDDDDDDDDDDDDDDDDDDDDDDDDDDDDDDDDDDDDDDDDDDDDDDDDDDDDDDDDDDDD  
ARG rich  
601 PGMVWQNRDIYYQGPIWAKIPHTDGHFHPSPLIGGFGLKHPPPQIFIKNTPVANPATTF 660  
UUUUUU

Beta sheet  
Beta turn  
Disordered termini DDDDDDDDDDDDDDDDDDDDDDDDDDDDDDDDDDDDDDDDDDDDDDDDDDDDDDDDDDDDDDD  
ARG rich  
661 SSTPVNSFITQYSTGQVSVQIDWEIQKERSKRWNPEVQFTSNYQQNSLLWAPDAAGKYT 720

Beta sheet  
Beta turn  
Disordered termini DDDDDDDDDDDDDDDDDDDDDDDDDDDDDDDDDDDDDDDDDDDDDDDDDDDDDDDDDDDDDDD  
ARG rich  
721 EPRAIGTRYLTHHL 734

Belladonna mottle virus

Capsid (CP) | P03601  
 Beta sheet  
 Beta turn  
 Disordered termini DDD  
 ARG rich  
 1 MDSSEVVVKVQASIPAPGSILSQPNTEQSPAIVLQFEATTFGTAEATAQVSLQTADPI 60  
 Beta sheet SSSSSSSSSSSS  
 Beta turn UU UUU  
 Disordered termini  
 ARG rich  
 61 TKLTAPYRHAQIVECKAILTPDLAVSNPLTVYLAWVPANSPATPTQILKLRVYGGQSFV 120  
 Beta sheet SSSSSSSSSS  
 Beta turn UU  
 Disordered termini  
 ARG rich  
 121 LGGAISAAKTIEVPLNLDVNRMLKDSVTYTDTPKLLAYSRAPTNPSKIPTASIQISGRI 180  
 Beta sheet SSS  
 Beta turn UUUU  
 Disordered termini  
 ARG rich  
 181 RLSKPMLIAN 190

Bacillus phage phi29

Portal protein (P10) | P04332  
 Beta sheet  
 Beta turn  
 Disordered termini DDDDDDD  
 ARG rich RRRRRRRRRRRRRRRRRRRR  
 1 MARKRSNTYRSINEIQRQKRNRWFIHYLNYLQSLAYQLFEWENLPPTINPSFLEKSIHQF 60  
 Beta sheet  
 Beta turn  
 Disordered termini  
 ARG rich  
 61 GYVGFYKDPVISYIACNGALSGQRDVYNQATVFRAASPVYQKEFKLYNYRDMKEEDMGVV 120  
 Beta sheet  
 Beta turn  
 Disordered termini  
 ARG rich  
 121 IYNNDMAFPPTPTLELFAELAEELKEIISVNQNAQKTPVLIRANDNNQLSLKQVYNQYEG 180  
 Beta sheet  
 Beta turn  
 Disordered termini  
 ARG rich  
 181 NAPVIFAHEALSDSIEVFKTDAPYVVDKLNQKNAVWNEMMTFLGIKKNANLEKKERMVT 240  
 Beta sheet  
 Beta turn  
 Disordered termini DDDDDDDDDDDDDDD  
 ARG rich  
 241 DEVSSNDEQIESSGTVFLKSREEACEKINELYGLNVKVKFRYDIVEQMRRELQQIENVSR 300  
 Beta sheet  
 Beta turn  
 Disordered termini DDDDDDDDD  
 ARG rich  
 301 GTSDGETNE 309

Proximal tail-tube connector (P11) | P68930

Beta sheet  
 Beta turn  
 Disordered termini D  
 ARG rich  
 1 MSSYTMQLRITYIEMWSQGETGLSTAIEKIEKGRPKLDFDFNYPIFDESRYRTIFETHFIRNFY 60

Beta sheet  
 Beta turn  
 Disordered termini  
 ARG rich  
 61 MREIGFETEGFLFKFHLETWLMINMPYFNKLFESSELIKYPLENTRVGVKSNTKNDTDRND 120

Beta sheet  
 Beta turn  
 Disordered termini  
 ARG rich  
 121 NRDVKQDLTSNGTSSTDAKQNDTSKTTGNEKSSGSGSITDDNFKRDLNADTADDRLQLTT 180

Beta sheet  
 Beta turn  
 Disordered termini  
 ARG rich  
 181 KDGEVLEYASQIEEHNNKKRDTKTSNTTDTTSNTTGTSTLSDSKTSNKANTTSNDKL 240

Beta sheet  
 Beta turn  
 Disordered termini  
 ARG rich  
 241 NSQINSVEDYIEDRVGKIGTQSYARLVMDYREALLRIEQRIFNEMQELFMLVY 293

Pre-neck appendage protein (gP12) | P20345 [1 - 691]

Beta sheet  
 Beta turn  
 Disordered termini  
 ARG rich  
 1 MSTKPELKRFEQFGEMMVQLYERYLPFAFDESLLLEKMNKIIHYLNEIGKVTNELIEEW 60

Beta sheet  
 Beta turn  
 Disordered termini  
 ARG rich  
 61 NKVMEWILNDGLEDLVKETLERWYEEGKFADLVIQVIDELKQFGVSVKTYGAKGDGVTDD 120

Beta sheet  
 Beta turn  
 Disordered termini  
 ARG rich  
 121 IRAFEKAIESGFPVYVPGTFMVSIRGIKLPSTVLTGAGKRNAVIKFMDSVGRGESLMYN 180

Beta sheet  
 Beta turn  
 Disordered termini  
 ARG rich  
 181 QNVTTGNENIFLSSFTLDGNNKRLGQGISGIGGSRESNLSIRACHNVYIRDIEAVDCTLH 240

Beta sheet  
 Beta turn  
 Disordered termini  
 ARG rich  
 241 GIDITCGGLDYPYLGDTTAPNPSENIWIENCEATGFDDGITTHHSQYINILNCYSHDP 300

Beta sheet  
 Beta turn  
 Disordered termini  
 ARG rich  
 301 RLTANCNGFEIDDGSRHVLSNNRSKGCYGGIEIKAHGDAPAAYNISINGHMSVEDVRSY 360  
 SSSSSSSSSS

Beta sheet  
 Beta turn  
 Disordered termini  
 ARG rich  
 361 NFRHIGHHAATDPQSVSAKNIVASNLVSIKRNKRGFQDNATPRVLAVSAYYGVVINGLT 420  
 SS

Beta sheet  
 Beta turn  
 Disordered termini  
 ARG rich  
 421 GYTDDPNLLTETVVSQFRARNCSLNGVGLTGFSNSDNGIYVIGGSRGGDAVNISNVTLN 480

Beta sheet  
 Beta turn  
 Disordered termini  
 ARG rich  
 481 NSGRYGVSIGSGIENVSITNISGIGDGINSPVALVSTINSNPEISGLSSIGYPTAARVAG 540

Beta sheet  
 Beta turn  
 Disordered termini  
 ARG rich



|                       |                                     |                                                              |                      |
|-----------------------|-------------------------------------|--------------------------------------------------------------|----------------------|
| Beta sheet            |                                     |                                                              |                      |
| Beta turn             |                                     |                                                              |                      |
| Disordered termini    |                                     |                                                              |                      |
| ARG rich              |                                     | R                                                            |                      |
|                       | 241                                 | RSYMEDLHLIIDADLEAELDVDVLAKAFNMNRTDFLGNVTVIDGFASTGLEAVLVDKDF  | 300                  |
| Beta sheet            |                                     |                                                              | SSSSSSSSSSSSSSSSSS   |
| Beta turn             |                                     | UUUU                                                         |                      |
| Disordered termini    |                                     |                                                              |                      |
| ARG rich              |                                     |                                                              |                      |
|                       | 301                                 | MVYDNLHKMETVRNPRGLYWNYHHVWQTLVSRFANAVAFVSGDVPVAVTQVIVSPNIAA  | 360                  |
| Beta sheet            |                                     |                                                              |                      |
| Beta turn             |                                     |                                                              |                      |
| Disordered termini    |                                     |                                                              |                      |
| ARG rich              |                                     |                                                              |                      |
|                       | 361                                 | VKQGGQQQFTAYVRATNAKDHKVVWSVEGGSTGTAITGDGLLSVSGNEDNQLTVKATVDI | 420                  |
| Beta sheet            |                                     |                                                              |                      |
| Beta turn             |                                     |                                                              |                      |
| Disordered termini    |                                     | DDDDDD                                                       |                      |
| ARG rich              |                                     |                                                              |                      |
|                       | 421                                 | GTEKPKLVVGEAVVSIRPNNASGGAQA                                  | 448                  |
|                       |                                     |                                                              |                      |
| Capsid fiber protein  | (P8.5)   B3VMP4                     |                                                              |                      |
| Beta sheet            |                                     |                                                              |                      |
| Beta turn             |                                     |                                                              | UUUUU                |
| Disordered termini    |                                     |                                                              |                      |
| ARG rich              |                                     |                                                              |                      |
|                       | 1                                   | MMVSFTARAKSNVMAYRLLAYSQGGDDIIEISHAAENTIPDYVAVKDVDKGDLTQVNMYP | 60                   |
| Beta sheet            |                                     |                                                              |                      |
| Beta turn             |                                     |                                                              | UUU                  |
| Disordered termini    |                                     |                                                              |                      |
| ARG rich              |                                     |                                                              |                      |
|                       | 61                                  | AAWQVIAGSDIKVGDNLTTGKDGTAVPTDDPSTVFGYAVEEAQEQQLVTLVISRSKEISI | 120                  |
| Beta sheet            |                                     |                                                              |                      |
| Beta turn             |                                     |                                                              |                      |
| Disordered termini    |                                     |                                                              |                      |
| ARG rich              |                                     |                                                              |                      |
|                       | 121                                 | EVDDIKDAGDTGKRLKINTPSGARNIIENEDAKALINGETTNTNKKNLQDLLFSDGNV   | 180                  |
| Beta sheet            |                                     |                                                              |                      |
| Beta turn             |                                     |                                                              |                      |
| Disordered termini    |                                     |                                                              |                      |
| ARG rich              |                                     |                                                              |                      |
|                       | 181                                 | KAFIQATTTDENKTALQQLLVSNADVGLLSGNPTSDNKINLRMTIGAGVPYSLPAATTT  | 240                  |
| Beta sheet            |                                     |                                                              |                      |
| Beta turn             |                                     |                                                              |                      |
| Disordered termini    |                                     |                                                              |                      |
| ARG rich              |                                     |                                                              |                      |
|                       | 241                                 | TLGGVKKGAAVTASTATDVAVKDLNLSLITVLKNAGIIS                      | 280                  |
|                       |                                     |                                                              |                      |
| Tail knob protein gp9 | (Distal tube protein) (P9)   P04331 |                                                              |                      |
| Beta sheet            |                                     |                                                              |                      |
| Beta turn             |                                     | UUUU                                                         | UUUU                 |
| Disordered termini    |                                     |                                                              |                      |
| ARG rich              |                                     |                                                              | RRRRRRRRRRRRRRRRRRRR |
|                       | 1                                   | MAYVPLSGTNVRILADVPFSSNDYKNTWFTSSSNQYNWFNRKSRVYEMSKVTFMGFRENK | 60                   |
| Beta sheet            |                                     |                                                              |                      |
| Beta turn             |                                     |                                                              |                      |
| Disordered termini    |                                     |                                                              |                      |
| ARG rich              |                                     |                                                              |                      |
|                       | 61                                  | PYVSVSLPIDKLYSASYIMFQADYGNKWFYAFVTELEFKNSAVTYVHFIDVLQTMFD    | 120                  |
| Beta sheet            |                                     | SSSSSSSSSSSS                                                 |                      |
| Beta turn             |                                     |                                                              |                      |
| Disordered termini    |                                     |                                                              |                      |
| ARG rich              |                                     |                                                              |                      |
|                       | 121                                 | MKFQESFIVREHVKLWDDGTPPTINTIDEGLSYGSEYDIVSVENHKPYDDMMFLVIISKS | 180                  |
| Beta sheet            |                                     |                                                              |                      |
| Beta turn             |                                     |                                                              |                      |
| Disordered termini    |                                     |                                                              |                      |
| ARG rich              |                                     |                                                              |                      |
|                       | 181                                 | IMHGTPGEEESRLNDINASLNGMPQPLCYIIHPFYKDGKVPKTYIGDNNANLSPIVNMLT | 240                  |
| Beta sheet            |                                     |                                                              |                      |



```

Beta turn                          UUUUUUUUUUUUUUUU              UU
Disordered termini
ARG rich                      RRRRRRRRRRRRRRRR
241 NIFSQKSAVNDIVNMYVTDYIGLKLKYKNGDKELKLDKDMFEQAGIADDKHGNVDITIFVK 300

Beta sheet
Beta turn                          UUUUUUUUU
Disordered termini
ARG rich                      301 KIPDYEALEIDTGDKWGGFTKQESKLMMPYCVTEITDFKGNHMLKTEYINNSKCLKIQ 360

Beta sheet
Beta turn
Disordered termini
ARG rich                      361 VRGSLGVSINKVAYSVDYNADSALSGGNRLTASLDSSLINNNPNDAAILNDYLSAYLQGN 420

Beta sheet
Beta turn
Disordered termini
ARG rich                      421 KNSLENQKSSILFNGIMGMIGGGISAGASAAGGSALGMASVTGMTSTAGNAVLQMQAMQ 480

Beta sheet
Beta turn                          UUUUUUUUUU
Disordered termini
ARG rich                      RRRRRRRRRRRRRRRRRRRRRRRRRRRRRR
481 AKQADIANIPPQLTKMGGNTAFDYGNNGYRGVYVIKKQLKAEYRRSLSSFFHKYGYKINRV 540

Beta sheet                          SSSSSSSSSSSSS
Beta turn                          UUUUUUUUU
Disordered termini
ARG rich                      RRRRRRRRRRRRRRRRR
541 KKPMLRTRKAFNYVQTKDCFISGDINNNDLQEIRTIKDFNGITLWHTDIGNYSVENELR 599

Primer terminal protein (TP) (TP) | P03681
Beta sheet
Beta turn
Disordered termini          DD
ARG rich                    RRRRRRRRRRRRRRRRRRRRRRRRRRRRRR
1 MARSPIRIRIKDNDKAEYARLVKNTKAKIARTKKKYGVDLTAEIDIPDLDSFETRAQFNKW 60

Beta sheet
Beta turn                          UUUUU
Disordered termini
ARG rich                      61 KEQASSFTNRRANMRYQFEKNAYGVVASKAKIAEIERNTKEVQRLVDEKIKAMKDKEYYAG 120

Beta sheet
Beta turn
Disordered termini
ARG rich                      121 GKPQGTIEQRIAMTSPAHTGINRPHDFDFSKVRSYSRLRTLLEESMEMRTDPQYYEKKMI 180

Beta sheet
Beta turn                          UU
Disordered termini
ARG rich                      181 QLQLNFIKSVESGFNSFDAADELIEELKIKIPDDFYELFLRISEISFEFDSEGNVENV 240

Beta sheet
Beta turn
Disordered termini
ARG rich                      241 EGNVYKILSYLEQYRRGDFDLKGF 266

```

Cowpea chlorotic mottle virus

```

Capsid (CP) | P03601
Beta sheet
Beta turn
Disordered termini          DDDDDDDDDDDDDDDDDDDDDDD
ARG rich                    RRRRRRRRRRRRRRRRRR
1 MSTVGTGKLTARAAARKNKRNRTRVVQPVIVEPIASGQGKAIAKAWTGYSVSKWTASCA 60

Beta sheet
Beta turn                          UUUUUUUUU
Disordered termini

```

```

ARG rich
Beta sheet
Beta turn
Disordered termini
ARG rich
61 AAEAKVTSAITISLPNELSSERNKQLKVG RVLLWLGLLPSVSGTVKSCVTETQTAAASF 120

Beta sheet
Beta turn
Disordered termini
ARG rich
121 QVALAVADNSKDVVAAMYPEAFKGITLEQLTADLTIYLYSSAALTEGDVIVHLEVEHVRP 180

Beta sheet
Beta turn
Disordered termini
ARG rich
181 TFDDSFTP VY 190

Cucumber virus strain FNY
Capsid (CP) | P03601
Beta sheet
Beta turn
Disordered termini
ARG rich
1 DDDDDDDDDDDDDDDDDDDDDDDDDDDDD
RRRRRRRRRRRRRRRRRRRRRR
MDKSESTSAGRNRRRRRPRRGRSRSAPSSADANFRVLSQQLSRLNKTLAAGRPTINHPTFVG 60

Beta sheet
Beta turn
Disordered termini
ARG rich
61 SERCRPGYTF T SITLKPPKIDRGSYYGKRLLLPDSVTEYDKKLVSR IQIRVNPLPKFDST 120

Beta sheet
Beta turn
Disordered termini
ARG rich
121 VVWTVRKVPASSDLSVA AISAMFADGASPVLVYQYAASGVQANNKLLYDLSAMRADIGDM 180

Beta sheet
Beta turn
Disordered termini
ARG rich
181 RKYAVLVYSKDDALETDELVLHVDIEHQRIPTSGVLPV 218

Canine parvovirus 2 (Dog)
Major capsid, 1 variant of 3 (VP1) | O41855
Beta sheet
Beta turn
Disordered termini
ARG rich
1 MAPPAKRARRGLVPPGYKYLGPNSLDQGEPTNPSDAAAKEHDEYAAAYLRSGKNPYLYF 60

Beta sheet
Beta turn
Disordered termini
ARG rich
61 SPADQRFIDQTKDAKDWGGKIGHYFFRAKKA IAPVLTDPDHPSTSRPTKPTKRSKPPH 120

Beta sheet
Beta turn
Disordered termini
ARG rich
121 IFINLAKKKKAGAGQVKRNLAPMSDGA VQPDGGQPAVRNERATGSGNGSGGGGGGGSGG 180

Beta sheet
Beta turn
Disordered termini
ARG rich
181 VGISTGTFNNQTEFKFLENGWVEITANSSRLVHLNMPESENYRRVVVNNMDKTAVNGNMA 240

Beta sheet
Beta turn
Disordered termini
ARG rich
241 LDDIHAQIVTPWSLVDANAWGVWFNPGDWQLIVNTMSELHLVSFEQE I FNVVLKTVSESA 300
SSSSSSSSSSSS

```

Beta turn  
Disordered termini  
ARG rich  
301 TQPPTKVYNNDLTASLMVALDSNNTMPFPTAAMRSETLGFYFPWKPTIPTPWRYFQWDRT 360  
SS

Beta sheet  
Beta turn  
Disordered termini  
ARG rich  
361 LIPSHTGTSGTPTNIYHGTDPPDVQFYTIENSVPVHLLRTGDEFATGTFDFDCKPCRLTH 420

Beta sheet  
Beta turn  
Disordered termini  
ARG rich  
421 TWQTNRALGLPPFLNSLPQSEGATNFGDIGVQDKRRGVTQMGNNTNYITEATIMRPAEVG 480

Beta sheet  
Beta turn  
Disordered termini  
ARG rich  
481 YSAPYYSFEASTQGPFKTPIAAGRGAQTDENQAADGNPRYAFGRQHGQKTTTTGETPER 540

Beta sheet  
Beta turn  
Disordered termini  
ARG rich  
541 FTYIAHQDTGRYPEGDWIQININFLPVTNDNVLLPTDPIGGKTGINYTNIFNTYGLTAL 600

Beta sheet  
Beta turn  
Disordered termini  
ARG rich  
601 NNVPVYPNGQIWDKEFDTDLKPRHLVNAFVVCQNNCPGQLFVKVAPNLTNEYDPDASAN 660  
SSSSSSSSSSSSSSSSSSSS  
UUUUUUUUUUUUUU

Beta sheet  
Beta turn  
Disordered termini  
ARG rich  
661 MSRIVTYSDFWWKGLVFKAKLRASHTWNPIQQMSINVDNQFNYPVSNIGGMKIVYEKSQ 720  
RRRRRRRRRRRRRRRRRRRR

Beta sheet  
Beta turn  
Disordered termini  
ARG rich  
721 LAPRKLY 727

Capsid (VP2) | P22055 [70 - 341]  
Beta sheet  
Beta turn  
Disordered termini  
ARG rich  
1 MSDGAVQPDGGQPAVRNERATGSGNGSGGGGGGGGGVGIISTGTGFNNQTEFKFLENGWVE 60  
SSSSSSSSSSSS

Beta sheet  
Beta turn  
Disordered termini  
ARG rich  
61 ITANSSRLVHLNMPESENYRRVVVNNMDKTAVNGNMALDDIHAQIVTPWSLVDANAWGVW 120

Beta sheet  
Beta turn  
Disordered termini  
ARG rich  
121 FNPGDWQLIVNTMSELHLVSFEQEIFNVVLKTVSESATQPPTKVYNNDLTASLMVALDSN 180

Beta sheet  
Beta turn  
Disordered termini  
ARG rich  
181 NTMPFPTAAMRSETLGFYFPWKPTIPTPWRYFQWDRTLIPSHTGTSGTPTNIYHGTDPPD 240  
SSSSSSSSSSSS

Beta sheet  
Beta turn  
Disordered termini  
ARG rich  
241 VQFYTIENSVPVHLLRTGDEFATGTFDFDCKPCRLTHTWQTNRALGLPPFLNSLPQSEGA 300

Beta sheet  
Beta turn  
Disordered termini  
ARG rich  
301 TNFGDIGVQDKRRGVTQMGNNTNYITEATIMRPAEVGYSAPYYSFEASTQGPFKTPIAAG 360

```

Beta sheet
Beta turn
Disordered termini
ARG rich
361 RGGAQTDENQAADGNPRYAFGRQHGGKTTTTGETPERFTYIAHQDTGRYPEGDWIQNINF 420

Beta sheet
Beta turn
Disordered termini
ARG rich
421 NLPVTNDNVLLPTDPIGGKTGINYTNI FNTYGPLTALNNVPPVYPNGQIWDKEFDTDLKP 480
SSSSSSSSSSSSSSSSSSSS
UUUUUUUUUU

Beta sheet
Beta turn
Disordered termini
ARG rich
481 RLHVNAFFVCQNNCPGQLFVKVAPNL TNEYDPDASANMSRIVTYSDFWWKGLVFKAKLR 540
RRRRRRRRRRRRRRRRRRRRR

Beta sheet
Beta turn
Disordered termini
ARG rich
541 ASHTWNPIQQMSINVDNQFN YVPSNIGGMKIVYEKSQLAPRKLY 584
UUU

```

Cottontail rabbit papillomavirus (Kansas)

```

Major capsid (L1) | P03102
Beta sheet
Beta turn
Disordered termini
ARG rich
1 MAVWLSTQNKFYLPQPVT KIPSTDEYVTRTNV FYYASSDRLLTVGHPHYEIRDKGTMLV 60
SSSSSSSSSSSS
UUU

Beta sheet
Beta turn
Disordered termini
ARG rich
61 PKVSPNQYRVFR IKLPDPNKF AFGDKQLYDPEKERLWVCLRGIEVNRGQPLGVSVTGNPI 120

Beta sheet
Beta turn
Disordered termini
ARG rich
121 FNKFDDVENPTKY YNNHADQQDYRKSM AFDPKQVQLLMLGCVPATGEHWAQAKQCAEDPP 180
UUUU

Beta sheet
Beta turn
Disordered termini
ARG rich
181 QQTDCPPIELVNTV IEDGDMCEIGFGAMDH KTLQASLSEVPLELAQSISKYPDY LKMQKD 240
RRRRRRRRRRRRRRRRRRRRRRRRRRRRRRR

Beta sheet
Beta turn
Disordered termini
ARG rich
241 QFGDSMFFYARRE QMYARHFFSRAGGDKEN VKSRAYIKRTQMGEANANIATDNYCITPS 300

Beta sheet
Beta turn
Disordered termini
ARG rich
301 GSLVSSDSQVFN RAYWLQKAQGMNNGVC WD NQIFVTVVDNTRGTILSLVTKSKEQIKKTH 360

Beta sheet
Beta turn
Disordered termini
ARG rich
361 GKT VHFSSYL RHVEEYELQFVLQLCKVK LTPENLSYLHSMHPTIIDNWQLSVSAQPSGTL 420
UUUU

Beta sheet
Beta turn
Disordered termini
ARG rich
421 EDQYRYLQSIATK C PPPEPKENTDPYK NYKFW EVDLSEKLSDQLDQYPLGRKFLNQSGL 480
RRRRRRRRR

Beta sheet
Beta turn
Disordered termini
ARG rich
481 DDDDDDDDDDDDDDDDDDDDDDDDDDDDD
RRRRRRRRRRRRRRRRRRRRRRRRRRRRRRR
QRIGTKRPAPAPVSIVKSSKRKRRT 505

```

|                    |     |                                                                 |        |
|--------------------|-----|-----------------------------------------------------------------|--------|
| Minor capsid (L2)  |     | P03108                                                          |        |
| Beta sheet         |     |                                                                 |        |
| Beta turn          |     |                                                                 |        |
| Disordered termini |     | DDDDDDDDDDDDDDDD                                                |        |
| ARG rich           |     | RRRRRR                                                          |        |
|                    | 1   | MVARSRKRRRAAPQDIYPTCKIAGNCPADIQNKFENKTIADKILQYGS LGVFFGG LGISSA | 60     |
| Beta sheet         |     |                                                                 |        |
| Beta turn          |     |                                                                 |        |
| Disordered termini |     |                                                                 |        |
| ARG rich           |     |                                                                 |        |
|                    | 61  | GGSGGRLGYTPLSGGGGRVIAAAPVRRPPIITTESVGPLDIVPEVADPGGPTLVSLHELPAE  | 120    |
| Beta sheet         |     |                                                                 |        |
| Beta turn          |     |                                                                 |        |
| Disordered termini |     |                                                                 |        |
| ARG rich           |     |                                                                 |        |
|                    | 121 | TPYVSSTNVTGDGAAEPLPAGHGGSQISDVTSGTSGTVSRTHINNPVFEAPMTGDQDVSD    | 180    |
| Beta sheet         |     |                                                                 |        |
| Beta turn          |     |                                                                 |        |
| Disordered termini |     |                                                                 |        |
| ARG rich           |     |                                                                 |        |
|                    | 181 | VHVFAHSESSITINQNTENTGGELIEMVPLRHPPRSEGDFRETSFSTSTPIPD RSALRSIN  | 240    |
| Beta sheet         |     |                                                                 |        |
| Beta turn          |     | UUU                                                             |        |
| Disordered termini |     |                                                                 |        |
| ARG rich           |     |                                                                 |        |
|                    | 241 | VASRRYQQVQVENPAFLNRPREL VQFENTFDNPAFVDDEQLSLLFEQDLDTVVATPDPAF   | 300    |
| Beta sheet         |     | SSSSSSSSSSSSSS                                                  |        |
| Beta turn          |     | UUUUUUUUUUUU UUUU                                               |        |
| Disordered termini |     |                                                                 |        |
| ARG rich           |     | RRRRRRRRRRRRRRRRRRRRRRRRRRRRRRRRRRRRRRRRRRRRRRRRRR              |        |
|                    | 301 | QDVVRLSRPSFTQSRAGRVRVSR LGRTLMTQTRSGKAFGPAKH FYELSSIAEGPEPDIL   | 360    |
| Beta sheet         |     |                                                                 |        |
| Beta turn          |     |                                                                 | UUU    |
| Disordered termini |     |                                                                 |        |
| ARG rich           |     |                                                                 |        |
|                    | 361 | IPESQETSFTDATSKDTQQEAEVYADGSTLETDT SADENLTLVFS DRGRGQGS HVPIPG  | 420    |
| Beta sheet         |     |                                                                 |        |
| Beta turn          |     |                                                                 |        |
| Disordered termini |     |                                                                 |        |
| ARG rich           |     |                                                                 | RRRRRR |
|                    | 421 | KSTIGGPVNIGDSKYITLNPGETTSFEADVISPVFIFEGNADGTYYLEEPLRKKRRKSIF    | 480    |
| Beta sheet         |     |                                                                 |        |
| Beta turn          |     |                                                                 |        |
| Disordered termini |     |                                                                 |        |
| ARG rich           |     |                                                                 |        |
|                    | 481 | LLADGSVAVYAE                                                    | 492    |

Coxsackievirus A21

|                                    |     |                                                                |     |
|------------------------------------|-----|----------------------------------------------------------------|-----|
| Major capsid, 1 variant of 3 (VP1) |     | O41855                                                         |     |
| Beta sheet                         |     |                                                                |     |
| Beta turn                          |     |                                                                |     |
| Disordered termini                 |     |                                                                |     |
| ARG rich                           |     |                                                                |     |
|                                    | 1   | GIEDLIDTAIKNALRVSQPLRPSQLKQPNGVNSQEV PALTAVETGASGQAIPSDVVETRH  | 60  |
| Beta sheet                         |     |                                                                |     |
| Beta turn                          |     |                                                                |     |
| Disordered termini                 |     |                                                                |     |
| ARG rich                           |     |                                                                |     |
|                                    | 61  | VINYKTRSESCLESFFGRAACVTILSLTNSSKS GEEKKHFN IWNITYTDTVQLRRKLEFF | 120 |
| Beta sheet                         |     |                                                                |     |
| Beta turn                          |     |                                                                |     |
| Disordered termini                 |     |                                                                |     |
| ARG rich                           |     |                                                                |     |
|                                    | 121 | TYSRFDLEMTFVFTENYPSTASGEVRNQCDQIMYIPPGAPRPSWDDYTWQSSSNPSIFY    | 180 |
| Beta sheet                         |     |                                                                |     |
| Beta turn                          |     |                                                                | UUU |

Disordered termini  
 ARG rich  
 181 MYGNAPPRMSIPYVGIANAYSHFYDGFARVPLEGENTDAGDTFYGLVLSINDFGVLA VRAV 240  
 SSSSSSSSSSSSSSSSSSSSSSS  
 Beta sheet  
 Beta turn UUUUUUUUUUUUUUUUUUUUUUU UUUU  
 Disordered termini  
 ARG rich RRRRRRRRRRRRRRRRRRRRRRR  
 241 NRSNPHTIHTSVRVYMKPKHIRCWCPRPPRAVLYRGEVDMISSAIQPLTKVDSITTF 298

Capsid (VP2) | P22055 [70 - 341]

Beta sheet  
 Beta turn  
 Disordered termini  
 ARG rich  
 1 SPNVEACGYSDRVRQITLGNSTITTQEANAIVAYGEWPTYINDSEANPVDAPTEPDVSS 60  
 Beta sheet  
 Beta turn UUUUU UUU  
 Disordered termini  
 ARG rich  
 61 NRFYTLESVSWKTTSRGWWWKLPDCLKDMGMFGQNMYYHYLGRSGYTIHVQC NASKFHQG 120  
 Beta sheet  
 Beta turn  
 Disordered termini  
 ARG rich  
 121 ALGVFLIPEFVMACNTESKTSYVSYINANPGERGGEFTNTY NPSNTDVSEGRQFAALDYL 180  
 Beta sheet SSSSSSSSSSSSS  
 Beta turn UU  
 Disordered termini  
 ARG rich  
 181 LGSGVLAGNAFVYPHQIINLRTNNSATIVVPYVNSLVIDCMAKHNNW GIVILPLAPLafa 240  
 Beta sheet  
 Beta turn  
 Disordered termini  
 ARG rich  
 241 ATSSPQVPITVTIAPMCTEFNGLRNITIPVHQ 272

Capsid (VP3) | P22055 [342 - 581]

Beta sheet  
 Beta turn  
 Disordered termini  
 ARG rich  
 1 GLPTMNTPGSNQFLTSDDFQSPCALPNFDVTPPIHIPGEVKNM MELAEIDTLIPMNAVDG 60  
 Beta sheet SSSSSSSSSSSSSSS  
 Beta turn  
 Disordered termini  
 ARG rich  
 61 KVNTMEMYQIPLNDNLSKAPIFCLSLSPASDKRLSHTMLGEIL NYTHWTGSIRFTFLFC 120  
 Beta sheet S  
 Beta turn UUUUU  
 Disordered termini  
 ARG rich  
 121 GSMMATGKLLLSYPPGAKPPTNRKDAMLGTHI IWDLGLQSSCSMVAPWISNTVYRRCAR 180  
 Beta sheet SSSSSSSSSSSSS  
 Beta turn  
 Disordered termini D  
 ARG rich  
 181 DDFTEGGFITCFYQTRIVVPASTPTSMFMLGFVSACPDFSV RLLRDTSHISQSKLIARTQ 240  
 Beta sheet  
 Beta turn  
 Disordered termini  
 ARG rich  
 241 240

Inner capsid (VP4) | P22055 [2 - 69]

Beta sheet  
 Beta turn  
 Disordered termini  
 ARG rich  
 1 GAQVSTQKTGAHENQNVAANGSTINYTTINYKDSASNSATRQDLSQDPSK FTEPVKDLM 60

Beta sheet  
Beta turn  
Disordered termini  
ARG rich  
61 LKTAPALN 68

Viral protein genome linked (VPg) | P22055 [1541 - 1562]  
Beta sheet  
Beta turn  
Disordered termini D  
ARG rich  
1 GAYTGLPNKKPNVPTIRIAKVQ 22

Human coxsackievirus B5 (Peterborough)

Major capsid, 1 variant of 3 (VP1) | O41855

Beta sheet  
Beta turn  
Disordered termini  
ARG rich  
1 FYQGGPGEAVERAIARVADTISSGPVNSESIPALTAETGHTSQVVPADTMQTRHVKNYH 60

Beta sheet  
Beta turn  
Disordered termini  
ARG rich  
61 SRSESTVENFLCRSACVYYTTYKNHGTDGDNFAYWVINTRQVAQLRRKLEMFTYARFDLE 120

Beta sheet  
Beta turn  
Disordered termini  
ARG rich  
121 LTFVITSTQEQSTIQGQDSPVLTHQIMYVPPGGPVPTKINSYSWQTSTNPSVFWTEGSAP 180

Beta sheet  
Beta turn  
Disordered termini  
ARG rich  
181 PRISIPFISIGNAYSMFYDGWAKFDKQGTYGINTLNNMGTLYMRHVNDGSPGPVSTVRI 240

Beta sheet  
Beta turn  
Disordered termini  
ARG rich  
241 YFKPKHVKTWVPRPRLCQYQKAGNVNFEPTGVTESRTEITAMQTT 286

Capsid (VP2) | P22055 [70 - 341]

Beta sheet  
Beta turn  
Disordered termini  
ARG rich  
1 SPSAECEGYSDRVSITLGNSTITTQECANVVVGYGTWPTYLKDEEATAEDQPTQPDVAT 60

Beta sheet  
Beta turn  
Disordered termini  
ARG rich  
61 CRFYTLESVMWQSSPGWWWKFPDALSNMGLFGQNMQYHYLGRAGYTVHVQCNAKSFHQG 120

Beta sheet  
Beta turn  
Disordered termini  
ARG rich  
121 CLLVVCVPEAEMGCATLANKPDQKSLNGETANTFDSQNTTGQTAVQANVINAGMGVGVG 180

Beta sheet  
Beta turn  
Disordered termini  
ARG rich  
181 NLTIFPHQWINLRTNNSATIVMPYINSVPMDNMFRHNNFTLMIIPFAPLSYSTGATTYVP 240

241 ITVTVAPMCAEYNGRLRLAGKQ 261

Capsid (VP3) | P22055 [342 - 581]

Beta sheet

Beta turn

Disordered termini

ARG rich

1 GLPTMLTPGNSQFLTSSDDFQSPSAMPQFDVTPEMAI PGQVNNLMEIAEVDSVVPVNNTEG 60  
SSSSSSSSSSSSSS

Beta sheet

Beta turn

Disordered termini

ARG rich

61 KVSSIEAYQIPVQSNSTNGSQVFGFPLIPGASSVLNRTLLGEILNYTHWSGSIKLTFFM 120  
SS

Beta sheet

Beta turn

Disordered termini

ARG rich

121 CGSAMATGKFLLAYSPPGAGAPTRKEAMLGTHVIWDVGLQSSCVLCIPWISQTHYRYVV 180

Beta sheet

Beta turn

Disordered termini

ARG rich

181 VDEYTAGGYITCWYQTNIVVPADTQSDCKILCFVSACNDFSVRMLKDTPFIKQDSF 236

Inner capsid (VP4) | P22055 [2 - 69]

Beta sheet

Beta turn

Disordered termini

ARG rich

1 GAQVSTQKTGAHETGLRASGNSIIHYTNINYYKDAASNSANRQEFAQDPGKFTPEVKDIM 60

Beta sheet

Beta turn

Disordered termini

ARG rich

61 IKSMPALN 68

Viral protein genome linked (VPg) | P22055 [1541 - 1562]

Beta sheet

Beta turn

Disordered termini

ARG rich

1 GAYTGMPNQKPKVPTLRQAKVQ 22

Enterobacteria phage fr

Maturation (A) | P15966

Beta sheet

Beta turn

Disordered termini

ARG rich

1 MRKFIPTERMSKSHVVSVREYADGELEDNSLPLIYRSNWSPGQYTSTGPRTKEWHYPSSY 60  
UUUUUU UUUUUU

Beta sheet

Beta turn

Disordered termini

ARG rich

61 SRGAIGIKALDQGYARLGTSWGREFEERAGYGM SIDARSCYSLFPVSQNLTWIDVPTNV 120

Beta sheet

Beta turn

Disordered termini

ARG rich

121 ANRATTEVLGKVTQGNFNLGVALAEARSTASQLSTQTIALIKAYTAARRGNWRQALRYLA 180  
RRRRRRRRRRRRRRRRRR

Beta sheet

Beta turn

Disordered termini

ARG rich

181 LNENRKFNSKSVASRWLELQFGWMPLLSDIQAYEMLTKVHLKAFMPRAVRQVQNVSL 240  
UUUUUU UUUUU



Beta sheet SSSSSSSSSSSSSSSSSSS  
 Beta turn  
 Disordered termini  
 ARG rich 241 SGRLTSPAASYKSTCNISRRIVIFYINDARLAWLSSLGILNPLGIVWEKVPFSLVDWL 300  
 Beta sheet SSSSSSSSSSSSSSSSSSS  
 Beta turn  
 Disordered termini  
 ARG rich 301 LPVGNMLEGLTAPIGCSYQSGTVTDVISGESTITADDIYGWDTVRPATAKVQISAVHRGV 360  
 Beta sheet  
 Beta turn  
 Disordered termini  
 ARG rich 361 QSVWPTTGVYVKSPFSMVHTLDALALFRQLWK 393

Capsid (CP) | P03601  
 Beta sheet SSSS  
 Beta turn  
 Disordered termini DD  
 ARG rich RRRRRRRRRRRRRRRRRRRRRR  
 1 MASFEEFVLVDNGGTGDVKVAPSNFANGVAEWISSNSRSQAYKVTCSVRQSSANNRKYT 60  
 Beta sheet SSSSSSSSSSSSS SSSSSSSSSSSSS  
 Beta turn  
 Disordered termini  
 ARG rich RRRRRR  
 61 VKVEVPKVATQVQGGVELPVAAWSYMNMELTIPVFATNDDCALIVKALQGTFTGNPIA 120  
 Beta sheet  
 Beta turn  
 Disordered termini  
 ARG rich 121 TAIANSIY 130

Enterobacteria phage GA

Maturation (A) | P15966  
 Beta sheet  
 Beta turn UUUUUU UUUU UUUUUU  
 Disordered termini  
 ARG rich RRRRRRRRRRRRRRRRRRRRRR RRRRRRRRRRRRRRRRRRRRRR  
 1 MFPKSNIDRNYKVKLISYDKKGLVSDDSFEQVENYLFQNRSTTYKPGYIRDFRRPTNF 60  
 Beta sheet  
 Beta turn  
 Disordered termini  
 ARG rich RRRRR  
 61 WNGYRCFNQPVGTFTRKLSGGQVADYGIVNPNKFTANSQHLGDNMVIYPGPF SINIDQ 120  
 Beta sheet  
 Beta turn UUUUUU  
 Disordered termini  
 ARG rich 121 RASVEVLNKLQS NLNIGVAIAEAKMTASLLAKQSIALIRAYTAAKRGNWREVLSQLLIS 180  
 Beta sheet  
 Beta turn UUUUUUUU  
 Disordered termini  
 ARG rich 181 EHRFRAPAKDLGGRWLELQYGLWPLMSDLKAAAYDLLTQTKLP AFMPLRVTRTVGGTHNYK 240  
 Beta sheet SSSSSSSSSSSSSSSSSSS  
 Beta turn  
 Disordered termini  
 ARG rich 241 VRNVESAGDTWSYRHRLSVNYRIWYFISDPR LAWASSLGLLNPLEIYWEKTPWSFVVDWF 300  
 Beta sheet SSSSSSSSSSSSSSSSSSS SSSSSSSSSSSSSSSSSSS  
 Beta turn  
 Disordered termini  
 ARG rich 301 LPVGNLIEAMSNPLGLDIIISGTKTWQLESKLNATLPASGWSGTAKLTAYAKAYDRSTFYS 360  
 Beta sheet  
 Beta turn

Disordered termini  
 ARG rich 361 FPTPLPYVKSPLSGLHLANALALINQRLKR 390

Capsid (CP) | P03601  
 Beta sheet SSSSS  
 Beta turn  
 Disordered termini D  
 ARG rich RRRRRRRRRRRRRRRRRRRRRRRR  
 1 MATLRSFVLVDNNGGTGNVTVPVSNANGVAEWLSNNSRSQAYRVTASYRASGADKRKYAI 60  
 Beta sheet SSSSSSSSSSSS SSSSSSSSSSSS  
 Beta turn  
 Disordered termini  
 ARG rich RRRRRR  
 61 KLEVPKIVTQVVNGVELPGSAWKAYASIDLTIPIFAATDDVTVISKSLAGLFKVGNPPIAE 120  
 Beta sheet  
 Beta turn  
 Disordered termini  
 ARG rich  
 121 AISSQSGFYA 130

Escherichia phage MS2

Maturation (A) | P15966  
 Beta sheet  
 Beta turn  
 Disordered termini  
 ARG rich 1 MRAFSTLDRENETFVPSVRVYADGETEDNSFSLKYRSNWTGRFNSTGAKTKQWHYPSPY 60  
 Beta sheet  
 Beta turn  
 Disordered termini  
 ARG rich 61 SRGALSVTSIDQGAYKRSGSSWGRPYEEKAGFGFSLDARSCYSLFPVSQNLTYIEVPQNV 120  
 Beta sheet  
 Beta turn UUUUUUUUUU  
 Disordered termini  
 ARG rich RRRRRRRRRRRRRRRRRRRR  
 121 ANRASTEVLQKVTQGDNFNLGVALAEARSTASQLATQTIALVKAYTAARRGNWRQALRYLA 180  
 Beta sheet SSSSSSSSSSSS  
 Beta turn UUUUUUUUUU UUU  
 Disordered termini  
 ARG rich RRRRRRRRRRRRRRRRRR  
 181 LNEDRKFRSKHVAGRWLELQFGWLPLMSDIQGAYEMLTKVHLQEFLEPMRAVRVQVTNIKL 240  
 Beta sheet S SSSSSSSSSSSSSSSSSS  
 Beta turn  
 Disordered termini  
 ARG rich 241 DGRLSYPAANFQTTCNISRRRIVIFYINDARLAWLSSLGILNPLGIVWEKVPFSFVVDWL 300  
 Beta sheet SSSSSSSSSSSS  
 Beta turn  
 Disordered termini  
 ARG rich 301 LPVGNMLEGLTAPVGC SYMSGTVTDVITGESIISVDAPYGWTVRQGTAKAQISAMHRGV 360  
 Beta sheet S  
 Beta turn  
 Disordered termini  
 ARG rich 361 QSVWPTTGAYVKS PFSMVHTLDALALIRQLSR 393

Capsid (CP) | P03601  
 Beta sheet SSSSSSSSSSSS SSSS  
 Beta turn  
 Disordered termini DD  
 ARG rich RRRRRRRRRRRRRRRRRRRRRRRR  
 1 MASNFTQFVLVDNNGGTGDVTVAPSNFANGVAEWISSNRSQAYKVTCSVRQSSAQNRKYT 60  
 Beta sheet SSSSSSSSSSSS SSSSSSSSSSSS

```

Beta turn
Disordered termini
ARG rich          61  RRRRRRR
                   IKVEVPKVATQTVGGVELPVAAWRSYLNMEITIPFATNSDCELVKAMQGLLKDGNPIP 120

Beta sheet
Beta turn
Disordered termini
ARG rich          121  SAIAANSGIY 130

```

Escherischia phage Qb

```

Minor capsid protein (A1) | Q8LTE1
Beta sheet
Beta turn
Disordered termini
ARG rich          1  RRRRRRRRRRRRRRR
                   MAKLETVTTLGNIGKDGKQTLVLNPRGVNPTNGVASLSQAGAVPALEKRVTVSVSQPSRNR 60
Beta sheet
Beta turn
Disordered termini
ARG rich          61  RRRRRRRRR
                   KNYKVQVKIQNPTACTANGSCDPSVTRQAYADVTFSTQYSTDEERAFV RTELAALLASP 120

Beta sheet
Beta turn
Disordered termini
ARG rich          121  LLIDAIDQLNPAYWTLIIAGGGSGSKPDPVIPDPPIDPPPGTGKYTCFPAIWSLEEVYEP 180

Beta sheet
Beta turn
Disordered termini
ARG rich          181  PTKNRPWPIYNAVELQPREFDVALKDLLGNTKWRDWSRSLSYTTVRGCRGNGYIDL DATY 240

Beta sheet
Beta turn
Disordered termini
ARG rich          241  RRRRRRRRRRRRRRRRRRRRRRRRRRRRRRRRR
                   LATDQAMRDQKYDIREGKKPGAFGNIERFIY LKSINAYCSLSDIAAYHADGVIVGFWRDP 300

Beta sheet
Beta turn
Disordered termini
ARG rich          301  UUUUUUU
                   SSGGAI PFDFTKFDKTKCPIQAVIVVPRA 329

```

Maturation (A2) | P03610

```

Beta sheet
Beta turn
Disordered termini
ARG rich          1  RRRRRRRRRRRRRRRRRRRRRRRRRRRRRRRRR
                   MPKLPRGLRFGADNEILNDFQELWFPDLFIESSDTHPWYTLKGRV LNAHLDDRLPNVGGRR 60
Beta sheet
Beta turn
Disordered termini
ARG rich          61  RRRRRRRRR
                   QVRRTPHRVTVPIASSGLRPVTTVQYDPAALS FLLNARVDWDFGNGDSANLVINDFLFRT 120

Beta sheet
Beta turn
Disordered termini
ARG rich          121  RRRRRRRRRRRRRRRRRRRRRRRRRRRRRRRRR
                   FAPKEFD FSNSLVP RYTQAFSAFNAKYGTMIGEGLETIKYLG LLLRRLREGYRAVKRGDL 180

Beta sheet
Beta turn
Disordered termini
ARG rich          181  RRRRRRRRRRRRRRRRRRRRRRRRRRRRRRRRR
                   RALRRVIQSYHNGKWK PATAGNLWLEFRYGLMPLFYDIRDVMLDWQNR HDKIQRLLRFSV 240
Beta sheet
Beta turn
Disordered termini
ARG rich          301  SSSSSSSSSSSSSSSSSSSSSSSSSSSSSSSSSSS

```

ARG rich 241 RRRRRRRRRRRRRRRRRRRRRR  
 GHGEDYVVEFDNLYPAVAYFKLKGEITLERRHRHGISYANREGYAVFDNGSLRPVSDWKE 300  
 Beta sheet SSSSSSSSSSSSSSSSSSSSS  
 Beta turn  
 Disordered termini  
 ARG rich 301 RRRRRRRRRRR  
 LATAFINPHEVAVELTPYSFVVDWFLNVGDILAQQGQLYHNIDIVDGFDRRDIRLKSFTI 360  
 Beta sheet SSSS SSSSSSSSSSSSSSSSSSSSS  
 Beta turn  
 Disordered termini  
 ARG rich 361 RRRRRRRR  
 KGERNGRPVNVASLSAVDLFYSRLHTSNLPPFATLDDLDTTFSSFKHVLDISIFLLTQRVKR 420  
 Beta sheet  
 Beta turn  
 Disordered termini  
 ARG rich 421 420

Capsid (CP) | P03601  
 Beta sheet  
 Beta turn UUUU UUU  
 Disordered termini D  
 ARG rich RRRRRRRRRRRRRRRR  
 1 MAKLETVTLGNIKDGKQTLVLNPRGVNPTNGVASLSQAGAVPALEKRVTVSVSQPSRNR 60  
 Beta sheet SSSSSSSSSSSSSSS  
 Beta turn UUUUUUUU  
 Disordered termini  
 ARG rich RRRRRRRR  
 61 KNYKVQVKIQNPTACTANGSCDPSVTRQAYADVTFSTQYSTDEERAFVRTELAALLASP 120  
 Beta sheet  
 Beta turn  
 Disordered termini  
 ARG rich 121 LLIDAIDQLNPAY 133

Enterobacteria phage SP

Minor capsid protein (A1) | Q8LTE1  
 Beta sheet SSSSSSSSSSSSSSS  
 Beta turn UUUU UUU  
 Disordered termini D  
 ARG rich 1 MAKLNQVTLKIGKNGDQTLTLTPRGVNPTNGVASLSEAGAVPALEKRVTVSVAQPSRNR 60  
 Beta sheet SSSSSSSSSSSSSSS SSSSSSSSSSSSS  
 Beta turn UUUUUUUU  
 Disordered termini  
 ARG rich 61 KNFKVQIKLQNPACTRDACDPSVTRSAFADVTLSTSYSTDEERALIRTELAALLADPL 120  
 Beta sheet  
 Beta turn  
 Disordered termini  
 ARG rich 121 IVDAIDNLPAYWAALLVASSGGGDNPSDPDVPVVPDVKPPDGTGRYKCPFACYRLGSIY 180  
 Beta sheet  
 Beta turn  
 Disordered termini  
 ARG rich 181 RRRRRRRRRRRRRRRRRRRR  
 EVGKEGSPDIYERGEVSVTFDYALEDFLGNTNWRNWDQRLSDYDIANRRRCRNGYIDL 240  
 Beta sheet SSSSSSSSSSSSS  
 Beta turn UUUUUUUU  
 Disordered termini  
 ARG rich RRRRRRRRRRRRRRRRRRRR  
 241 DATAMQSDDFVLSGRYGVKVKFPGAFGSIKYLNIQGDAWLDLSEVTAYRSYGMVIGFW 300  
 Beta sheet S  
 Beta turn  
 Disordered termini  
 ARG rich 301 TDSKSPQLPTDFTQFNSANCPVQTVIIIPSL 331

Maturation (A2) | P03610  
Beta sheet  
Beta turn  
Disordered termini D  
ARG rich  
1 MPTLPRGLRFGSNGEVLNDFEALWFPERHTVDSLNGTCKLTGYITNLPGYSDIFPNKGV 60  
Beta sheet SSSSSSSSSSSS  
Beta turn UUUUU  
Disordered termini  
ARG rich  
61 AARTPYRSTVPVNHLYRVPVTVVEYIPDGYVRLDGHVKFEGDLVNGSVDLTNHFVISLAA 120  
Beta sheet UUUUUUUUUUUUUUUUU  
Beta turn  
Disordered termini  
ARG rich RRRRRRRRRRRRRRRRRRRRRRRRRRRRRRRRRRRRRRRRRRRRRRRRRRRRRRRRRRRRRRR  
121 QGGFDYQSVIGPRFSARFSAFSTKYGVLLGEGRETLKYLLLVRRMREGYRAVRRGDLKR 180  
Beta sheet  
Beta turn UU  
Disordered termini  
ARG rich RR RRRRRRRRRRRRRRRRRRRRRRRRRRRRRRRRRRRRRRRRRRRRRRRRRRRRRRRRRRRRRRR  
181 LRNVISTFEPSTIKGKRARAEFSTQTYRDKLTGNKVEVRPSEGKWNSSASDLWLEFRYGL 240  
Beta sheet SSSSSSSSSSSS  
Beta turn UUU  
Disordered termini  
ARG rich RRRRRRRRRRRRRRRRRRRRRRRRRRRRRRRRRRRRRRRRRRRRRRRRRRRRRRRRRRRRRRR  
241 MPLFYDIQSVMEDFMRVHKKIAKIQRFSAGHGKLETVSSRFYDPVHFSLEVTAVLQRRHR 300  
Beta sheet SSSSSS  
Beta turn UUUU  
Disordered termini  
ARG rich  
301 WGVIYQDTGSFATFNNGRLVPKDWKTAAFALLNPAEVAWEVTPYSFVVDWFVNVGDMLE 360  
Beta sheet SSSSSSSSSSSSSSSSSSSSS  
Beta turn UU  
Disordered termini  
ARG rich RRRRRRRRRRRRRRRRRRRRRRRRRRRRRRRRRRRRRRRRRRRRRRRRRRRRRRRRRRRRRRR  
361 QMGQLYRHVDVVDGFDRKDIKLSVSVRVLTNDVAHVASFQLRQAKLLHSYYSRVHTVAF 420  
Beta sheet  
Beta turn  
Disordered termini  
ARG rich  
421 PQISPQLDTEIRSVKVIDSIALLTQRVKR 450

Capsid (CP) | P03601  
Beta sheet SSSSSSSSSSSSSSSSSSSSSSSSSSSSSSSSSSSSSSSSSSSSSSSSSSSSSSSSSSSSSSSSS  
Beta turn UUU  
Disordered termini D  
ARG rich  
1 MAKLNQVTLTKIGKNGDQTLTTPRGVNPTNGVASLSEAGAVPALEKRVTVSVAQPSRNR 60  
Beta sheet SSSSSSSSSSSSSS  
Beta turn UUUUUUU  
Disordered termini  
ARG rich  
61 KNFKVQIKLQNPTACTRDACDPVTRSAFADVTLSTSYSTDEERALIRTELAALLADPL 120  
Beta sheet  
Beta turn  
Disordered termini  
ARG rich  
121 IVDAIDNLNPAY 132

Echovirus 1 (strain Human/Egypt/Farouk/1951) (E-1)  
Major capsid, 1 variant of 3 (VP1) | O41855  
Beta sheet  
Beta turn  
Disordered termini  
ARG rich

```

1 FYQGDVQNAVEGAMVVRVADTVQTSATNSERVPNLTAVETGHTSQAVPGDTMQTRHVINNH 60
Beta sheet
Beta turn
Disordered termini
ARG rich
61 VRSESTIENFLARSACVFYLEYKGTGKEDSNFNNWVITTRRVAQLRRKLEMFTYLRFD 120
Beta sheet
Beta turn
Disordered termini
ARG rich
121 EITVVITSSQDQSTSQNQNAPVLTHQIMYVPPGGPIPVSVDDYSWQTSTNPSIFWTEGNA 180
Beta sheet
Beta turn
Disordered termini
ARG rich
181 PARM SIPFISIGNAYSNFYDGWSHFSQAGVYGFTTLNMGQLFFRHVNKPNPAAITSVAR 240
Beta sheet
Beta turn
Disordered termini
ARG rich
241 IYFKPKHVRRAWVPRPRLCPYINSTNVNFEPKPVTEVRTNIITT 284

```

Capsid (VP2) | P22055 [70 - 341]

```

Beta sheet
Beta turn
Disordered termini
ARG rich
1 SPTVEECGYSDRVR SITLGNSTITTQECANVVVGYGEWPEYLS DNEATAEDQPTQPDVAT 60
Beta sheet
Beta turn
Disordered termini
ARG rich
61 CRFYTLDSVQWENGSPGWWKFPDALRDMGLFGQNMYYHYLGRAGYTIHVQCNASKFHQ 120
Beta sheet
Beta turn
Disordered termini
ARG rich
121 CILVVCVPEAEMGSAQTSGVVNYEHISKGEIASRFTTTTAE DHGVQA AVWNAGMGVGVG 180
Beta sheet
Beta turn
Disordered termini
ARG rich
181 NLTIFPHQWINLRTNNSATIVMPYVNSVPMDNMYRHHNFTLM IIPFVPLDFSAGASTYVP 240
Beta sheet
Beta turn
Disordered termini
ARG rich
241 ITVTVAPMCAEYNGRLRLAGHQ 261

```

Capsid (VP3) | P22055 [342 - 581]

```

Beta sheet
Beta turn
Disordered termini
ARG rich
1 GLPTMNTPGSNQFLTSDDFQSPSAMPQFDVTPEMHIPGEVRNLMEIAEVDSVMPINNSA 60
Beta sheet
Beta turn
Disordered termini
ARG rich
61 AKVSSMEAYRVELSTNTNAGTQVFGFQLNPGAESVMNRTLMEILNYYAHWSGSIKITFV 120
Beta sheet
Beta turn
Disordered termini
ARG rich
121 FCGSAMTTGKFLLSYAPPGAGAPKTRKDAMLGTHVVDVGLQSSCVLCIPWISQTHYRFV 180
Beta sheet
Beta turn
Disordered termini
ARG rich
181 EKDPYTNAGFVTCWYQTSVVS PASNQPKCYMMCMVSACNDFSVRMLRDTKFIEQTSF 237

```

Inner capsid (VP4) | P22055 [2 - 69]  
Beta sheet  
Beta turn  
Disordered termini  
ARG rich  
1 GAQVSTQKTGAHETSLSATGNSIIHYTNINYYKDAASNSANRQDFTQDPGKFTPEMKDVM 60  
Beta sheet  
Beta turn  
Disordered termini  
ARG rich  
61 IKTLPALN 68

Viral protein genome linked (VPg) | P22055 [1541 - 1562]  
Beta sheet  
Beta turn  
Disordered termini D  
ARG rich  
1 GAYTGMPNQKPKVPTLRQAKVQ 22

Erysimum latent virus  
Capsid (CP) | P03601  
Beta sheet  
Beta turn  
Disordered termini DDDDDDDDDDDDD  
ARG rich  
1 MTSSRSTELIETQEDVVRKLSQKTPVSNFSALPLPNGFPQAPTQLQPFQFEFPLPAGQEGS 60  
Beta sheet SSSSSSSSSSSSS  
Beta turn UUUU  
Disordered termini  
ARG rich  
61 VTLPLATFPKMATFSLRHRRAQLTQLHAVVSPSAVSIGHPLTVQLIWVPASSTTTSSQIL 120  
Beta sheet  
Beta turn  
Disordered termini  
ARG rich  
121 GTYGGQQISVGGQVTNSSPAKVSANLLMMNPHIKDSTSYPDTPKLLVYSTPAVPDDKLTT 180  
Beta sheet  
Beta turn  
Disordered termini  
ARG rich  
181 SSASIIVFGEVLLSSPQLNPSA 202

Human adenovirus C5  
core-capsid bridging protein (CoreCapsid) | P24938  
Beta sheet  
Beta turn  
Disordered termini D  
ARG rich RRRRRRRRRRRRRRRRRR  
1 MSKRRIKEEMLQVIAPFIYGPKEEQDYKPRKLRVKKKKKKDDDELDDDEVELLHATAP 60  
Beta sheet  
Beta turn UUUUUUUUUUUUUUUUUUUUUUUUUUUUU  
Disordered termini  
ARG rich RRRRRRRRRRRRRRRR  
61 RRRVQWKGRVVRVLRPGTTVVFTPGERSTRYKRVYDEVYGEDDLLEQANERLGEFAYG 120  
Beta sheet  
Beta turn UUUU UUU  
Disordered termini  
ARG rich  
121 KRHKDMLALPLDEGNPTPSLKPVTLQQVLPALAPSEEKRLKRESGLDAPTVQLMVPKRQ 180  
Beta sheet  
Beta turn U

Disordered termini  
 ARG rich 181 RLEDVLEKMTVEFPLEPEVVRPIKQVAPGLGVQTVDVQIPTTSSTSIATATEGMETQTS 240

Beta sheet  
 Beta turn  
 Disordered termini  
 ARG rich 241 PVASAVADA AVQAVAAAASKTSTEVQTD PWFVRSAPRRPRGRSRKYGAASALLPEYALHP 300

Beta sheet  
 Beta turn  
 Disordered termini  
 ARG rich 301 SIAPTPGYRGYTYRPRRRATRRRTTTGTRRRRRRRRQVVLAPISVRRVAREGGRTLVLPT 360

Beta sheet  
 Beta turn  
 Disordered termini  
 ARG rich 361 RR ARYHPSIV 368

Histone-like nucleoprotein (HistoneLike) | P68951 [25 - 198]

Beta sheet  
 Beta turn  
 Disordered termini  
 ARG rich 1 RRRRRRRRRRRRRRRRRRRRRRRRRRRRRRRR AKKRS DQHPVVRGHRAPWGAHKRGRGTGRTTVDDAIDAVVEEARNYTPTPPPSTVDAA 60

Beta sheet  
 Beta turn  
 Disordered termini  
 ARG rich 61 RRRRRRRRRRRRRRRRRRRRRRRRRRRRRRRRRRRRRRRRRRRRRRRRRRRRRRRRR IQTVVRGARRYAKMKRRRRRVARRRRRRPGTAAQRAAAALLNRARRTGRRRAAMRAARLA 120

Beta sheet  
 Beta turn  
 Disordered termini  
 ARG rich 121 RRRRRRRRRRRRRRRRRRRRRRRRRRRRRRRRRRRRRRRRRRRRRRRRRRRRRRRRR D AGIVTVPPRSRRRAAAAAAISAMTQGRRGVYVWRDSVSGLRVVRTRPPRN 174

Hexon-linking protein (IIIa) | P12537 [1 - 570]

Beta sheet  
 Beta turn  
 Disordered termini  
 ARG rich 1 DDDDD MMQDATDPAVRAALQSQPSGLNSTDDWRQVMDRIMSLTARNPDAFRQQPQANRLSAILEA 60

Beta sheet  
 Beta turn  
 Disordered termini  
 ARG rich 61 UUUU VVPARANPTHEKVLAIVNALAEENRAIRPDEAGLVYDALLQRVARYNSGNVQTNLDRLVGD 120

Beta sheet  
 Beta turn  
 Disordered termini  
 ARG rich 121 VREAVAQRERAQQGNLGSVALNAFLSTQPANVPRGQEDYTNFVSALRLMVTETPQSEV 180

Beta sheet  
 Beta turn  
 Disordered termini  
 ARG rich 181 YQSGPDYFFQTSRQGLQTVNLSQAFKNLQGLWGVRAPTGDRATVSSLLTPNSRLLLLLLIA 240

Beta sheet  
 Beta turn  
 Disordered termini  
 ARG rich 241 PFTDSGSVSRD TYLGHLLTLYREAIGQAHVDEHTFQEITSVSRALGQEDTGSLEATLNYL 300

Beta sheet  
 Beta turn  
 Disordered termini  
 ARG rich 301 LTNRQKIPSLHSLNSEERILRYVQQSVSLNLMRDGVTPSVALDMTARNMEPGMYASNR 360

Beta sheet  
 Beta turn  
 Disordered termini



ARG rich 361 PFINRLMDYLHRAAAVNPEYFTNAILNPHWLPPPGFYTGGFEVPEGNDGFLWDDIDDSVF 420

Beta sheet  
Beta turn  
Disordered termini  
ARG rich 421 SPQPQTLLELQREQAEEALRKESFRRPSSLSLSDLGAAAPRSDASSFPFSLIGSLTSTRTT 480

Beta sheet  
Beta turn  
Disordered termini DDDDDDDDDDDDDDDDD  
ARG rich RRRRRRRRRRRRRRRRRRRR 481 RPRLLGEEYLNNSLLQPQREKNLPPAFPNNGIESLVDKMSRWKTYAQEHRDVPGRPPT 540

Beta sheet  
Beta turn  
Disordered termini DDDDDDDDDDDDDDDDDDDDDDDDDDDDDDDDDDDDD  
ARG rich RRRRRRRRRR 541 RRQRHDRQRGLVWEDDSADDSSVLDLGGS 570

Packaging protein (IVa2) | P03271

Beta sheet  
Beta turn  
Disordered termini DDDDDDDDDDDDDDDDDDDDDDDDDDDDDDDDDDDDDDDDDDDDDDDDDDDDDDDDDDDDDDD  
ARG rich 1 METRGRRAALQHQQDQPQAHPGQRAARSAPLHRDPDYADEDPAVERHDPGPGSGRAPTT 60

Beta sheet  
Beta turn  
Disordered termini DDDDDDDDDDDDDDD  
ARG rich 61 AVQRKPPQPAKRGDMLDRDAVEQVTELWDRLELLGQTLKSMPTADGLKPLKNFASLQELL 120

Beta sheet  
Beta turn  
Disordered termini  
ARG rich 121 SLGGERLLADLVRENMRVRDMLNEVAPLLRDDGSCSSLNQYLHPVIGVIYGPTGCGKSQL 180

Beta sheet  
Beta turn  
Disordered termini  
ARG rich 181 LRNLLSSQLISPTPETVFFIAPQVDMIPPSELKAWEMQICEGNYAPGPDGTIIPQSGTLR 240

Beta sheet  
Beta turn  
Disordered termini  
ARG rich 241 PRFVKMAYDDLILEHNYDVSDPRNIFAQAAARGPIAIMDEC MENLGGHKGVSKFFHAFP 300

Beta sheet  
Beta turn UUUUUUUU UUU  
Disordered termini  
ARG rich RRRRRRRRRR 301 SKLHDKFPKCTGYTVLVVLHNMNPRDMAGNIANLKIQSKMHLISPRMHPSQLNRFVNTY 360

Beta sheet  
Beta turn UUUUUUUUUU UUU  
Disordered termini  
ARG rich 361 TKGLPLAISLLLKDFRHHQARSCYDWIIYNTTPQHEALQWCYLHPRDGLMPMYLNIQSH 420

Beta sheet  
Beta turn  
Disordered termini DDDD  
ARG rich RRRRRRRRRRRRRRRRRRRRRRRRRRRRRRR 421 LYHVLEKIHRTLNDRDRWSRAYRARKTPK 449

hexon-interlacing protein (IX) | P03281

Beta sheet  
Beta turn  
Disordered termini DDDD  
ARG rich 1 MSTNSFDGSIVSSYLTTTRMPPWAGVRQNVMGSSIDGRPVL PANSTTLTYETVSGTPLETA 60

Beta sheet  
Beta turn  
Disordered termini  
ARG rich

|                     |     |                                                               |              |
|---------------------|-----|---------------------------------------------------------------|--------------|
|                     | 61  | ASAAASAAAATARGIVTDFAFLSPLASSAASRSSARDDKLTALLAQLDSDLTRELNVSQQ  | 120          |
| Beta sheet          |     |                                                               |              |
| Beta turn           |     |                                                               |              |
| Disordered termini  |     | DDDDDD                                                        |              |
| ARG rich            |     |                                                               |              |
|                     | 121 | LLDLRQQVSALKASSPPNAV                                          | 140          |
|                     |     |                                                               |              |
| Penton protein (L2) |     | P12538                                                        |              |
| Beta sheet          |     |                                                               |              |
| Beta turn           |     |                                                               |              |
| Disordered termini  |     | D                                                             |              |
| ARG rich            |     |                                                               |              |
|                     | 1   | MRRAAMYEEGPPPSYESVVSAAAPVAAALGSPFDAPLDPFFVPPRYLRPTGGRNSIRYSEL | 60           |
| Beta sheet          |     |                                                               |              |
| Beta turn           |     |                                                               | UUU          |
| Disordered termini  |     |                                                               |              |
| ARG rich            |     |                                                               |              |
|                     | 61  | APLFDTTRVYLVDNKSTDVASLNYQNDHSNFLTTVIQNDYSPGEASTQTINLDDRSHWG   | 120          |
| Beta sheet          |     |                                                               |              |
| Beta turn           |     |                                                               |              |
| Disordered termini  |     |                                                               |              |
| ARG rich            |     | RRRRRRRRRRRRRRRRRRRR                                          |              |
|                     | 121 | GDLKTILHTNMPNVNEFMFTNKFKARVMVSRLLPTKDNQVELKYEWVEFTLPEGNYSETMT | 180          |
| Beta sheet          |     |                                                               |              |
| Beta turn           |     |                                                               | UUUUUUU      |
| Disordered termini  |     |                                                               |              |
| ARG rich            |     |                                                               |              |
|                     | 181 | IDLMNNAIVEHYLKVGRQNGVLES DIGVKFDTRNFRGLGDPVTGLVMPGVYTNEAFHPDI | 240          |
| Beta sheet          |     |                                                               |              |
| Beta turn           |     |                                                               | UUU          |
| Disordered termini  |     |                                                               |              |
| ARG rich            |     | RRRRRRRRRRRRRRRRRR                                            |              |
|                     | 241 | ILLPGCGVDFTHSRLSNLLGIRKRQPFQEGFRITYDDLEGGNIPALLDVDAYQASLKDDT  | 300          |
| Beta sheet          |     |                                                               |              |
| Beta turn           |     |                                                               |              |
| Disordered termini  |     |                                                               |              |
| ARG rich            |     |                                                               |              |
|                     | 301 | EQGGGAGGSNSSSGSAEENSNAAAAAMQFVEDMNDHAIRGDTFATRAEEKRAEAEAAAE   | 360          |
| Beta sheet          |     |                                                               | SSSSSSSSSSSS |
| Beta turn           |     |                                                               | UUU          |
| Disordered termini  |     |                                                               |              |
| ARG rich            |     | RRRRRRRRRRRRRRRRRR                                            |              |
|                     | 361 | AAAPAAQPEVEKPKKPKVILKPLTEDSKKRSYNLISNDSTFTQYRSWYLAYNYGDPQTGIR | 420          |
| Beta sheet          |     |                                                               |              |
| Beta turn           |     |                                                               |              |
| Disordered termini  |     |                                                               |              |
| ARG rich            |     |                                                               |              |
|                     | 421 | SWTLLCTPDVTCGSEQVYWSLPMQDPVTFRSTRQISNFPVVGAE LLPVHKS SFYNDQA  | 480          |
| Beta sheet          |     |                                                               |              |
| Beta turn           |     |                                                               | UUUUU        |
| Disordered termini  |     |                                                               |              |
| ARG rich            |     |                                                               |              |
|                     | 481 | VYSQLIRQFTSLTHVFNRFENQILARPPAPTITTVSENPALTDHGTLPLRNSIGGVQR    | 540          |
| Beta sheet          |     |                                                               | SSSSSSSSSSSS |
| Beta turn           |     |                                                               | UUU          |
| Disordered termini  |     |                                                               |              |
| ARG rich            |     |                                                               |              |
|                     | 541 | VTITDARRRTCPVYKALGIVSPRVLSSRTF                                | 571          |
|                     |     |                                                               |              |
| Hexon protein (L3)  |     | P04133                                                        |              |
| Beta sheet          |     |                                                               |              |
| Beta turn           |     |                                                               |              |
| Disordered termini  |     | DD                                                            |              |
| ARG rich            |     |                                                               |              |
|                     | 1   | MATPSMMPQWSYMHISGQDASEYLSPLVQFARATETYFSLNNKFRNPTVAPTHDVTDDR   | 60           |
| Beta sheet          |     |                                                               | SSSSSSSSSSSS |
| Beta turn           |     |                                                               |              |
| Disordered termini  |     |                                                               |              |
| ARG rich            |     |                                                               |              |
|                     | 61  | SQRLTLRFIPVDREDTAYSYKARFTLAVGDNRVLDMASTYFDIRGVLDRGPTFKPYSGTA  | 120          |

|                    |     |                                                                |                      |
|--------------------|-----|----------------------------------------------------------------|----------------------|
| Beta sheet         |     |                                                                |                      |
| Beta turn          |     |                                                                |                      |
| Disordered termini |     |                                                                |                      |
| ARG rich           | 121 | YNALAPKGPAPNPCEWDEAATALEINLEEEEDDDNEDEVDEQAEQQKTHVFGQAPYSGINIT | 180                  |
| Beta sheet         |     |                                                                |                      |
| Beta turn          |     | UUUUU                                                          | UUUUUUUUU            |
| Disordered termini |     |                                                                |                      |
| ARG rich           | 181 | KEGIQIGVEGQTPKYADKTFQPEPQIGESQWYETEINHAAGRVLKKTTPMKPCYGSYAKP   | 240                  |
| Beta sheet         |     |                                                                |                      |
| Beta turn          |     |                                                                |                      |
| Disordered termini |     |                                                                |                      |
| ARG rich           | 241 | TNENGGQGILVKQQNGKLESQVEMQFFSTTEATAGNGDNLTPKVVLVYSEDVDIETPDTHI  | 300                  |
| Beta sheet         |     |                                                                |                      |
| Beta turn          |     |                                                                |                      |
| Disordered termini |     |                                                                |                      |
| ARG rich           | 301 | SYMPTIKEGNSRELMGQQSMPNRPNYIAFRDNFIGLMYYNSTGNMGVLAGQASQLNAVVD   | 360                  |
| Beta sheet         |     |                                                                |                      |
| Beta turn          |     | UUU                                                            |                      |
| Disordered termini |     |                                                                |                      |
| ARG rich           | 361 | LQDRNTELSYQLLLDSIGDRTRYFSMWNQAVDSYDPDVRIIENHGTEDELPNYCFPLGGV   | 420                  |
| Beta sheet         |     |                                                                |                      |
| Beta turn          |     |                                                                |                      |
| Disordered termini |     |                                                                |                      |
| ARG rich           | 421 | INTELTTKVKPKTGQENGWEKDATEFSKNEIRVGNNFAMEINLNANLWRNFLYSNIALY    | 480                  |
| Beta sheet         |     |                                                                |                      |
| Beta turn          |     | UU                                                             |                      |
| Disordered termini |     |                                                                |                      |
| ARG rich           | 481 | LPDKLKYSPSNVKISDNPNYDYMNKRVPGLVDCYINLGARWSLDYMDNVNPFNHHRN      | 540                  |
| Beta sheet         |     |                                                                |                      |
| Beta turn          |     |                                                                | UU                   |
| Disordered termini |     |                                                                |                      |
| ARG rich           | 541 | AGLRYRSMLLNGGRYVPPHIIQVPQKFFAIKNLLLLPGSYTYEWNFRKDVNMVLQSSLGND  | 600                  |
| Beta sheet         |     |                                                                |                      |
| Beta turn          |     |                                                                |                      |
| Disordered termini |     |                                                                |                      |
| ARG rich           | 601 | LRVDGASIKFDSICLYATFFPMAHNTASTLEAMLRNDTNDQSFNDYLSAANMLYPIPANA   | 660                  |
| Beta sheet         |     |                                                                | SSSSSSSSSS           |
| Beta turn          |     |                                                                |                      |
| Disordered termini |     |                                                                |                      |
| ARG rich           | 661 | TNVPISSIPSRNWAAFARGWAFTRLKTKETPSLGSYDPYYTYSGSIPYLDGTFYLNHTFKK  | 720                  |
| Beta sheet         |     |                                                                | SSSSS                |
| Beta turn          |     |                                                                |                      |
| Disordered termini |     |                                                                |                      |
| ARG rich           | 721 | VAITFDSSVSWPGNDRLLTPNEFEIKRSVDGEGYNVAQCNMTKDWFLVQMLANYNIGYQG   | 780                  |
| Beta sheet         |     |                                                                |                      |
| Beta turn          |     | UUU                                                            |                      |
| Disordered termini |     |                                                                |                      |
| ARG rich           | 781 | RRRRRRRRRRRRRRRRRRRRRRRRRRRRRRRRRRRRRRRRRRRRRRRRRRRRRRRRRRRRRR | 840                  |
| Beta sheet         |     |                                                                |                      |
| Beta turn          |     |                                                                | UUUUU                |
| Disordered termini |     |                                                                |                      |
| ARG rich           | 841 | RRRRRRRRRRRRRRRRRRRRRRRRRRRRRRRRRRRRRRRRRRRRRRRRRRRRRRRRRRRRRR | 900                  |
| Beta sheet         |     |                                                                | SSSSSSSSSSSSSSSSSSSS |
| Beta turn          |     |                                                                | UUUUUUU              |
| Disordered termini |     |                                                                |                      |
| ARG rich           | 901 | LDMTFEVDPMDEPTLLYVLFVDFVVRVHRPHRGVIEVYLRTPFSAGNATT             | 952                  |

Fiber protein (L5) | P11818  
 Beta sheet  
 Beta turn  
 Disordered termini DDDDDD  
 ARG rich  
 1 MKRARPSEDTFNPVYPYDTEETGPPTVPFLTPPFVSPNGFQESPPGVLSLRLSEPLVTSNG 60  
 Beta sheet  
 Beta turn UUUU  
 Disordered termini  
 ARG rich  
 61 MLALKMGNGLSLDEAGNLTSQNVTTVSPPLKKTAKSNINLEISAPLTVTSEALTVAAAAPL 120  
 Beta sheet  
 Beta turn  
 Disordered termini  
 ARG rich  
 121 MVAGNTLTMQSQAPLTVHDSKLSIATQGPLTVSEGLALQTSGLPLTTTDSSTLTITASPP 180  
 Beta sheet  
 Beta turn  
 Disordered termini  
 ARG rich  
 181 LTTATGSLGIDLKEPIYTQNGKLGKYGAPLHVTDLNTLTVATGPGVTINNTSLQTKVT 240  
 Beta sheet  
 Beta turn UU  
 Disordered termini  
 ARG rich  
 241 GALGFDSQGNMQLNVAGGLRIDSQNRRLILDVSYPFDAQNLNLRGQGPLFINSAHNLD 300  
 Beta sheet  
 Beta turn UUU  
 Disordered termini  
 ARG rich  
 301 INYNKGLYLFASNNSKKLEVNLSSTAKGLMFDATAIAINAGDGLFEGSPNAPNTNPLKTK 360  
 Beta sheet  
 Beta turn UUU UUUUU UUUU  
 Disordered termini  
 ARG rich  
 361 IGHGLEFDSNKAMVPKLGTLGSLFDSTGAIITVGNKNNDKLTLWTTAPSPNCRLNAEKDAK 420  
 Beta sheet  
 Beta turn SSSSSSSSSSS  
 Disordered termini  
 ARG rich  
 421 LTLVLTCKGSQILATVSVLAVKGLAPISGTVQSAHLIIRFDENGVLNNSFLDPEYWNF 480  
 Beta sheet  
 Beta turn UUUUUUUU UUU  
 Disordered termini  
 ARG rich  
 481 RNGDLTEGTAYTNAVGFMPNLSAYPKSHGKTAKSNIVSQVYLNKDGTKPVTLTITLNGTQ 540  
 Beta sheet  
 Beta turn  
 Disordered termini  
 ARG rich  
 541 ETGDTTPSAYSMSFSWDWSGHNYINEIFATSSYTFYSYIAQE 581

Protease (Protease) | P03253  
 Beta sheet  
 Beta turn UU UU  
 Disordered termini  
 ARG rich  
 1 MGSSEQELKAIKDLGCGPYFLGTYDKRFPFVSPHKLACAIVNTAGRETGGVHWMAFAW 60  
 Beta sheet  
 Beta turn UUU  
 Disordered termini  
 ARG rich  
 61 NPHSKTCYLFEPFGFSDQRLKQVYQFEYESLLRRSAIASSPDRCTITLEKSTQSVQGPNSA 120  
 Beta sheet  
 Beta turn  
 Disordered termini  
 ARG rich  
 121 ACGLFCCMFLHAFANWPQTPMDHNPTMNLITGVPNSMLNSPQVQPTLRRNQEQLYSFLER 180  
 Beta sheet  
 Beta turn UUU  
 Disordered termini

ARG rich  
181 HSPYFRSHSAQIRSATSFCFLKMN 204

Endosome lysis protein (VI) | P24937 [34 - 239]  
Beta sheet  
Beta turn  
Disordered termini  
ARG rich  
1 AFSWGLWSGIKNGFSTVKNYGSKAWNSSTGQMLRDKLKEQNFQQKVVVDGLASGISGVVD 60  
Beta sheet  
Beta turn  
Disordered termini  
ARG rich  
61 LANQAVQNKINSKLDPRPPVEEPPPAVETVSPTEGRGEKRRPRPDREETLVTQIDEPPSYEE 120  
Beta sheet  
Beta turn  
Disordered termini  
ARG rich  
121 ALKQGLPTTRPIAPMATGVLGQHTPVTLDLPPPADTQQKPVLPGPTAVVVTRPSRSLRR 180  
Beta sheet  
Beta turn  
Disordered termini  
ARG rich  
181 AASGPRSLRPVASGNWQSTLNSIVGL 206

Hexon-linking protein C (inner capsid) (VIIIIC) | P24936 [158 - 227]  
Beta sheet  
Beta turn  
Disordered termini D  
ARG rich  
1 GRPSFTPRQAILTLQTSSEPRSGGIGTLQFIEEFVPSVYFNPFSGPPGHYPDQFIPNFD 60  
Beta sheet  
Beta turn  
Disordered termini  
ARG rich  
61 AVKDSADGYD 70

Hexon-linking protein N (inner capsid) (VIIIN) | P24936 [1 - 111]  
Beta sheet  
Beta turn  
Disordered termini DD  
ARG rich  
1 MSKEIPTPYMWSYQPMGLAAGAAQDYSTRINYSAGPHMISRVNGIRAHNRILLEQAA 60  
Beta sheet  
Beta turn  
Disordered termini DDDDDDDD  
ARG rich  
61 ITTTPRNLLNPRSWPAALVYQESPAPTTVVLPDAQAEVQMTNSGAQLAGG 111

Core protein X (X) | Q2KS10 [33 - 51]  
Beta sheet  
Beta turn  
Disordered termini DDDDDDDDDDDDDDDDDDD  
ARG rich RRRRRRRRRRRRRRRR  
1 MRAHRRRRRASHRRMRGG 19

Hepatitis A virus  
Major capsid, 1 variant of 3 (VP1) | O41855  
Beta sheet  
Beta turn  
Disordered termini  
ARG rich RRRRRRRRRRR  
1 VGDDSGGFSTTVSTEQNVDPQVGIITMKDLKGGKANRGKMDVSGVQAPVGAITTIEDPVL 60  
Beta sheet

Beta turn  
 Disordered termini  
 ARG rich  
 61 AKKVPETFPELKPGESRHTSDHMSIYKFMGRSHFLCTFTFNSNNKEYTFPITLSSTSNPP 120

Beta sheet  
 Beta turn  
 Disordered termini  
 ARG rich  
 121 HGLPSTLRWFFNLFQLYRGPLDLTIIITGATDVDGMAWFTPVGLAVDTPWVEKESALSID 180

Beta sheet  
 Beta turn  
 Disordered termini  
 ARG rich  
 181 YKTALGAVRFNTRRTGNIQIRLPWYSYLYAVSGALDGLGDKTDSTFGLVSIQIANYNHSD 240

Beta sheet  
 Beta turn  
 Disordered termini  
 ARG rich  
 241 EYLSFSCYLSVTEQSEFYFPRAPLNSNAMLSTES 274

Capsid (VP2) | P22055 [70 - 341]

Beta sheet  
 Beta turn  
 Disordered termini  
 ARG rich  
 1 DIEEEQMIQSVDRTAVTGASYFTSVDQSSVHTAEVGS HQVEPLR TSVDKPGSKKTQGEKF 60  
 RRRRRRRRRRRRRRRR  
 SSSSSSSSSSSSSSS

Beta sheet  
 Beta turn  
 Disordered termini  
 ARG rich  
 61 FLIHSADWLTHALFHEVAKLDVVKLLYNEQFAVQGLLRYHTYARFGIEIQVINPTPFQ 120  
 UUUUUUUUU

Beta sheet  
 Beta turn  
 Disordered termini  
 ARG rich  
 121 QGGLICAMVPGDQSYGSIASLTVPYHGLLNCNINNVVRIKVPFIYTRGAYHFKDPQYPVW 180  
 SSSSSSSSSSSSSSSSSSS

Beta sheet  
 Beta turn  
 Disordered termini  
 ARG rich  
 181 ELTIRVWSELNIGTGTSAYTSLNVLARFTDLELHGLTPLSTQ 222

Capsid (VP3) | P22055 [342 - 581]

Beta sheet  
 Beta turn  
 Disordered termini  
 ARG rich  
 1 MMRNEFRVSTTENVVNLSNYEDARAKMSFALDQEDWKS DPSQGGIKITHFTTWTSTIPTL 60  
 D

Beta sheet  
 Beta turn  
 Disordered termini  
 ARG rich  
 61 AAQFPFNASDSVGGQIKVIPVDYFFQMTNTNPDQKCITALASICQMFCFWRGDLVDFDQ 120  
 UUUUUUU

Beta sheet  
 Beta turn  
 Disordered termini  
 ARG rich  
 121 VFPTKYHSGRLLFCFVPGNELIDVSGITLKQATTAPCAVMDITGVQSTLRFVWPWISDTP 180  
 SSSSSSSSSSSSSSSSSSS SSSSSSSSSSSSSSSSSSS

Beta sheet  
 Beta turn  
 Disordered termini  
 ARG rich  
 181 YRVNRYTKSAHQKGEYTAIGKLIVYCYNRLTSPSNVASHVRVNVYLSAINLECFAPLYHA 240  
 UUUUUUUUUUUU

Beta sheet  
 Beta turn  
 Disordered termini  
 ARG rich  
 241 MDVTTQ 246

Inner capsid (VP4) | P22055 [2 - 69]  
 Beta sheet  
 Beta turn  
 Disordered termini D  
 ARG rich  
 1 MNMSRQGFQTVGSGLDHILSLA 23

Viral protein genome linked (VPg) | P22055 [1541 - 1562]  
 Beta sheet  
 Beta turn  
 Disordered termini DD  
 ARG rich  
 1 GVYHGVTKPKQVIKLDADPVESQ 23

Human rhinovirus 2

Major capsid, 1 variant of 3 (VP1) | O41855  
 Beta sheet  
 Beta turn  
 Disordered termini DD  
 ARG rich  
 1 IAQNPVENYIDEVLNEVLVVPINSSNPTTSNSAPALDAAETGHTSSVQPEDVIETRYVQ 60  
 Beta sheet  
 Beta turn  
 Disordered termini  
 ARG rich  
 61 TSQTRDEMSLESFLGRSGCIHESKLEVTLANYNKENFTVWAINLQEMAQIRRFELFTYT 120  
 Beta sheet  
 Beta turn  
 Disordered termini  
 ARG rich  
 121 RFDSEITLVPCISALSQDIGHITMQYMYVPPGAPVNSRDDYAWQSGTNASVFWQHGQAY 180  
 Beta sheet SSSSSSSSSS  
 Beta turn UUUUUUUUUUUUUU  
 Disordered termini  
 ARG rich  
 181 PRFSLPFLSVASAYYMFYDGYDEQDQNYGTANTNNMGLCSRIVTEKHIHKVHIMTRIYH 240  
 Beta sheet SSSSSSSSSS  
 Beta turn UUUUUU  
 Disordered termini  
 ARG rich  
 241 KAKHVKAWCPRPPRALEYTRAHRTNFKIEDRSIQTAIVTRPIITTA 286

Capsid (VP2) | P22055 [70 - 341]

Beta sheet  
 Beta turn  
 Disordered termini  
 ARG rich  
 1 SPTVEACGYSDRIIQITRGDSTITSQDVANAIVAYGVWPHYLSSKSDASAIKPSQPDTS 60  
 Beta sheet SSSSSSSSSSSSSS  
 Beta turn UUU  
 Disordered termini  
 ARG rich  
 61 NRFYTLRSVTWSSSSKGWKKLPDALKDMGIFGENMFYHYLGRSGYTIHVQCNAKSFHQG 120  
 Beta sheet  
 Beta turn  
 Disordered termini  
 ARG rich  
 121 TLIVALIPEHQIASALHGNVNVGYNYTHPGETGREVKAETRLNPDLPTEEYWLNFDTL 180  
 Beta sheet  
 Beta turn  
 Disordered termini  
 ARG rich  
 181 LGNITIFPHQFINLRSNNSATIIAPYVNAVPMDSMRSHNNWSLVIIPICPLETSSAINTI 240  
 Beta sheet  
 Beta turn  
 Disordered termini

ARG rich  
241 PITISISPMCAEFSGARAKRQ 261

Capsid (VP3) | P22055 [342 - 581]  
Beta sheet  
Beta turn UUUU  
Disordered termini  
ARG rich  
1 GLPVFITPGSGQFLTTDDFQSPCALPWYHPTKEISIPGEVKNLVEICQVDSLVPINNTDT 60  
Beta sheet SSSSSSSSSSSSSSS  
Beta turn  
Disordered termini  
ARG rich  
61 YINSENMYSVVLQSSINAPDKIFSIRTDVASQPLATTLIGEISSYFTHWTGSLRFSFMFC 120  
Beta sheet S  
Beta turn  
Disordered termini  
ARG rich  
121 GTANTTVKLLLAYTPPGIAEPTTRKDAMLGTHVIWDVGLQSTISMVVPWISASHYRNTSP 180  
Beta sheet SSSSSSSSSSSSS  
Beta turn  
Disordered termini  
ARG rich  
181 GRSTSGYITCWYQTRLVIPPQTPPTARLLCFVSGCKDFCLRMARDTNLHLQSGAI 235

Inner capsid (VP4) | P22055 [2 - 69]  
Beta sheet  
Beta turn  
Disordered termini  
ARG rich  
1 GAQVSRQNVGTHSTQNSVSNSSLNIFNINYFKDAASNGASKLEFTQDPSKFTDPVKDVL 60  
Beta sheet  
Beta turn  
Disordered termini  
ARG rich  
61 EKGIPTLQ 68

Viral protein genome linked (VPg) | P22055 [1541 - 1562]  
Beta sheet  
Beta turn  
Disordered termini D  
ARG rich RRRRRRRRRR  
1 GPYSGEPKPKTKIPERRVVTQ 21

Mengo encephalomyocarditis virus

Major capsid, 1 variant of 3 (VP1) | O41855  
Beta sheet  
Beta turn  
Disordered termini  
ARG rich  
1 GVENAEKGV TENTDATAD FVAQPVYLPENQTKVAFFYDRSSPIGAFVAVKSGSLES GFAPF 60  
Beta sheet  
Beta turn  
Disordered termini  
ARG rich  
61 SNKACPN SVILTPGPQFDPAYDQLRPQRLTEIWGN GNEETSEVFPLKTKQDYSFCLFSPF 120  
Beta sheet  
Beta turn  
Disordered termini  
ARG rich  
121 VYYKCDLEVTLS PHTSGAHGLLVRWCPTGTPTKPTTQVLHEVSSLSEGRTPQVYSAGPGT 180  
Beta sheet SSSSSSS  
Beta turn UUUUU  
Disordered termini  
ARG rich RRRRRRRRRR



181 SNQISFVVPYNSPLSVLPAVWYNGHKRFDNTGDLGIAPNSDFGLFFAGTKPDIKFTVYL 240  
 Beta sheet SSSSSSSSSS  
 Beta turn  
 Disordered termini  
 ARG rich RRRRRRRRRR  
 241 RYKNMRVFCPRPTVFFPWPTSGDKIDMTPRAGVLMLE 277

Capsid (VP2) | P22055 [70 - 341]

Beta sheet  
 Beta turn UUUUU  
 Disordered termini  
 ARG rich  
 1 DQNTTEEMENLSDRVSQDTAGNTVTNTQSTVGRVLVGYGTVHDGEHPASCADTASEKILAVE 60  
 Beta sheet SSSSSSSSSSSSSSSSSSS  
 Beta turn  
 Disordered termini  
 ARG rich  
 61 RYYTFKVNDWTSTQKPFYIRIPLPHVLSGEDGGVFGATLRRHYLVKTGWRVQVCNASQ 120  
 Beta sheet  
 Beta turn  
 Disordered termini  
 ARG rich RRRRRRRRRRRRRRRRRR  
 121 FHAGSLLVFMapeyPTLDVfamdNRWSKDNLPNGTRTQTNRKGFAMDHQNFQWTLYPH 180  
 Beta sheet SSSSSSSSSSSSS  
 Beta turn  
 Disordered termini  
 ARG rich  
 181 QFLNLRNTTTVDLEVPYVNIAPTSSWTQHASWTLVIAVVAPLTYSTGASTSLDITASIQP 240  
 Beta sheet  
 Beta turn  
 Disordered termini D  
 ARG rich  
 241 VRPVFNGLRHEVLSRQ 256

Capsid (VP3) | P22055 [342 - 581]

Beta sheet  
 Beta turn UUU  
 Disordered termini  
 ARG rich  
 1 SPIPVTIREHAGTWYSTLPDSTVPIYGKTPVAPANYMVGeyKDFLEIAQIPTFIGNKVPN 60  
 Beta sheet SSSSSSSSSSSSSSSSS  
 Beta turn  
 Disordered termini  
 ARG rich  
 61 AVPYIEASNTAVKTQPLAVYQVTLSCSCLANTFLAALSRNFAQYRGS�VYTFVFTGTAMM 120  
 Beta sheet  
 Beta turn  
 Disordered termini  
 ARG rich  
 121 KGKFLIAYTPPGAGKPTSRDQAMQATYAIWDLGLNSSYSFTVPFISPTHFRMVGTDQANI 180  
 Beta sheet  
 Beta turn  
 Disordered termini  
 ARG rich  
 181 TNVDGWVTVWQLTPLTYPPGCPTSakILTMVSAGKDFSLKMPISpAPWSPQ 231

Inner capsid (VP4) | P22055 [2 - 69]

Beta sheet  
 Beta turn  
 Disordered termini DDDDDDDDDDDDDDD  
 ARG rich  
 1 GNSTSSDKNNSSEgNEgVIINNFYSNQYQNSIDLSANATGSDPPKTYGQFSNLLSGAVN 60  
 Beta sheet  
 Beta turn  
 Disordered termini  
 ARG rich  
 61 AFSNMLPLLA 70

Viral protein genome linked (VPg) | P22055 [1541 - 1562]  
Beta sheet  
Beta turn  
Disordered termini  
ARG rich

1 GPYNETTRIKPKTLQLLDVQ 20

Norwalk Virus (Funabashi)

Major capsid, 1 variant of 3 (VP1) | O41855

Beta sheet

Beta turn

Disordered termini DDDDDDDDDDDDD

ARG rich

1 MMMASKDATSSVDGASGAGQLVPEVNASDPLAMDPVAGSSTAVATAGQVNPIDPWIINNF 60  
SSSSSSSSSSSSSS

Beta sheet

Beta turn

Disordered termini

ARG rich

61 VQAPQGEFTISPNNTPGDVLFDLSLGPHLNPFLLHLSQMYNGWVGNMVRIMLAGNAFTA 120  
S

Beta sheet

Beta turn

Disordered termini

ARG rich

UUUUU

121 GKIIIVSCIPPGFGSHNLTIAQATLFPHVIAVVRTLDPIEVPLEDVRNVLFHNNDRNQQT 180  
SSSSSSSSSSSS

Beta sheet

Beta turn

Disordered termini

ARG rich

181 RLVCMLYTPLRTGGGTGDSFVAGRVMTCPSPDFNFLVLPPTVEQKTRPFTLPNLPLSS 240

Beta sheet

Beta turn

Disordered termini

ARG rich

241 LNSNRAPLPISMGISPNDVQSVQFQNGRCTLGRLVGTTPVSLSHVAKIRGTSNGTVIN 300

Beta sheet

Beta turn

Disordered termini

ARG rich

301 LTELDTGTPFHPFEGPAPIGFPDLGGCDWHINMTQFGHSSQTQYDVDTPDTFVPHLGSIQ 360

Beta sheet

Beta turn

Disordered termini

ARG rich

361 ANGIGSGNYVGVLSWISPPSHPSGSQVDLWKIPNYGSSITEATHLAPSVYPPGFGEVLVF 420

Beta sheet

Beta turn

Disordered termini

ARG rich

421 FMSKMPGPGAYNLPCLLPQEYISHLASEQAPTVEAALLHYVDPDTGRNLGEFKAYPDGF 480

Beta sheet

Beta turn

Disordered termini

ARG rich

RRRRRRRRRRRRRRRRRRRRRR

481 LTCVPNGASSGPQQLPINGVFVFSWVSRFYQLKPVGTASSARGRLGLRR 530

Capsid (VP2) | P22055 [70 - 341]

Beta sheet

Beta turn

Disordered termini DD

ARG rich

1 MAQAIIGAIIAASTAGSALGAGIQVGGEEALQSQRYYQNLQLQENSFKHDREMIGYQVEAS 60

Beta sheet

Beta turn

Disordered termini

ARG rich

61 NQLLAKNLATRYSLLRAGGLTSADAARSVAGAPVTRIVDWNQVRSAPESSATTLRSGGF 120

Beta sheet

Beta turn  
Disordered termini  
ARG rich  
121 MSVPIPFASKQKQVQSSGISNPNYSPSSISRTTSWVESQNSSRFGNLSPYHAEALNTVWL 180

Beta sheet  
Beta turn  
Disordered termini  
ARG rich  
181 TPPGSTASSTLSSVPRGYFNTDRLPLFANNRR 212

Viral protein genome linked (VPg) | P22055 [1541 - 1562]

Beta sheet  
Beta turn  
Disordered termini  
ARG rich  
1 DDDDDDDDDDDD  
RRRRRRRRRRRRRRRRRRRRRR  
GKNKGKTKKGRGRKNNYNAFSRRGLSDEEYEEYKKIREEKNGNYSIQEYLEDRQRYEEL 60

Beta sheet  
Beta turn  
Disordered termini  
ARG rich  
61 UUUUUUUUUUUU  
UUUU  
RRRRRRRRRRRRRRRRRRRRRR  
RRRRRRRRRRRRRR  
AEVQAGDGGIGETEMEIRHRVIFYKSKSKKHQQEQRRQLGLVTGSDIRKRPIDWTPPKN 120

Beta sheet  
Beta turn  
Disordered termini  
ARG rich  
121 RRRRRRRRRRRRRR  
EWADDDREVDYNEKINFE 138

Enterobacteriophage phiX174 (Sanger)

Capsid (F) | P03641

Beta sheet  
Beta turn  
Disordered termini  
ARG rich  
1 DD  
MSNIQTGAERMPHDLSHLGFLAGQIGRLITISTTPVIAGDSFEMDAVGALRLSPLRRGLA 60

Beta sheet  
Beta turn  
Disordered termini  
ARG rich  
61 IDSTVDIFTFYVPHRHVYGEQWIKFMKDGVNATPLPTVNTTGYIDHAAFLGTINPDTNKI 120

Beta sheet  
Beta turn  
Disordered termini  
ARG rich  
121 PKHLFQGYLNIYNNYFKAPWMPDRTEANPNELNQDDARYGFRCCHLKNIWTAPLPPEL 180  
SSSSS

Beta sheet  
Beta turn  
Disordered termini  
ARG rich  
181 SRQMTTSTTSIDIMGLQAAYANLHTDQERDYFMQRYHDVISSFGGKTSYDADNRPLLVMR 240  
SSSSSSSS SSSSSSSSSSS

Beta sheet  
Beta turn  
Disordered termini  
ARG rich  
241 SNLWASGYDVGTDQTSLGQFSGRVQQT YKHSVPRFFVPEHGMFTLALVRFPPATKEI 300

Beta sheet  
Beta turn  
Disordered termini  
ARG rich  
301 RRRRRRRRRRRRRRRRRRRRRRRRRRRRRRRRR  
QYLNAGALTYTDIAGDPVLYGNLPPREISMKDVFRSGDSSKKFKIAEGQWYRYAPSYVS 360  
SSSSSSSSSSSSSSSS

Beta sheet  
Beta turn  
Disordered termini  
ARG rich  
361 PAYHLLEGFPFIQEPSPGDIQERVLIRHHDYDQCFQSVQLLQWNSQVKFNVTVYRNLPTT 420

ARG rich  
421 RDSIMTS 427

Major spike (G) | P03643  
Beta sheet  
Beta turn  
Disordered termini  
ARG rich  
1 MFQTFISRHNSNFFSDKLVLTSVTPASSAPVLQTPKATSSTLYFDSLTVNAGNGGFLHCI 60  
Beta sheet  
Beta turn  
Disordered termini  
ARG rich  
61 QMDTSVNAANQVVSVGADIAFDADPKFFACLVRFESSVPTTLPTAYDVYPLNGRHDGGY 120  
Beta sheet  
Beta turn  
Disordered termini  
ARG rich  
121 YTVKDCVTIDVLPRTPGNNVYVGFMVWSNFTATKCRGLVSLNQVIKEIICLQPLK 175

Minor spike (H) | P03646  
Beta sheet  
Beta turn  
Disordered termini  
ARG rich  
1 DDDDDDDDDDDDDDDDDDDDDDDDDDDDDDDDDDDDDDDDDDDDDDD  
1 MFGAIAGGIASALAGGAMSKLFGGGQKAASGGIQGDVLTADNNTVGMGDAGIKSAIQGSN 60  
Beta sheet  
Beta turn  
Disordered termini  
ARG rich  
61 VPNPDEAAPSFVSGAMAKAGKGLLEGTLQAGTSAVSDKLLDLVGLGGKSAADKGDTRDY 120  
Beta sheet  
Beta turn  
Disordered termini  
ARG rich  
121 LAAAFPELNAWERAGADASSAGMVDAGFENQKELTKMQLDNQKEIAEMQNETQKEIAGIQ 180  
Beta sheet  
Beta turn  
Disordered termini  
ARG rich  
181 UUUUU  
181 SATSRQNTKDQVYAQNEMLAYQQKESTARVASIMENTNLSKQQVSEIMRQMLTQAQTAG 240  
Beta sheet  
Beta turn  
Disordered termini  
ARG rich  
241 QYFTNDQIKEMTRKVSAEVDLVHQQTQNQRYGSSHIGATAKDINVVTDAAAGVVDIFHG 300  
Beta sheet  
Beta turn  
Disordered termini  
ARG rich  
301 D  
301 IDKAVADTWNNFWKDGKADGIGSNLSRK 328

DNA-binding (J) | P69592  
Beta sheet  
Beta turn  
Disordered termini  
ARG rich  
1 DDDDDDDDDDD  
RRRRRRRRRRRRRRRRRRRRRRRRRRRRRRR  
1 MSKGKKRSGARPGRPQPLRGTKGKRKGARLWYVGGQQF 38

Pseudoalteromonas phage PM2  
Spike Protein (P1) | Q9XJR3  
Beta sheet  
Beta turn  
Disordered termini  
ARG rich

1 MIVKKKLAAGEFAETFKNGNNTI I I KAVGELVLRAYGADGGEGLRTIVRQGVSIKGMNYT 60  
 Beta sheet  
 Beta turn UUUUUUU  
 Disordered termini  
 ARG rich  
 61 SVM LHTEYAQEIEYWVGDDLYSFQEQTTKSRDVNSFQIPLRDGVRELLPEDASRNRA SIK 120  
 Beta sheet SSSSSSSSSSS  
 Beta turn  
 Disordered termini  
 ARG rich RRRRRRRRRRRR  
 121 SPVDIWIGGENMTALNGIVDGRKFEAGQEFQINTFGSVNYWVSDEEIRVFKEYSARAKY 180  
 Beta sheet S SSSSSSSSSSS  
 Beta turn  
 Disordered termini  
 ARG rich RRRRRR RRRRRRRR  
 181 AQNEGRTALEANNVPPFDIDVPELDGVPFSLKARVRHKS KGV DGLGDYTSISVKPAFYI 240  
 Beta sheet SS  
 Beta turn  
 Disordered termini  
 ARG rich  
 241 TEGDETTDTLIK YTSYGSTGSHSGYDFDNTLDVMVTL SAGVHRVFPVETELDYDAVQEV 300  
 Beta sheet SSSSSSSSSSS  
 Beta turn  
 Disordered termini  
 ARG rich  
 301 QHDWYDESFTTFIEVYSDDPLLTVKGYAQILMERT 335

Major capsid protein (P2) | P15794

Beta sheet  
 Beta turn  
 Disordered termini  
 ARG rich  
 1 MRSFLNLSIPNVAAGNSCSIKLPIGQTYEVIDLRYSGVTPSQIKNVRVELDGRLLSTYK 60  
 Beta sheet  
 Beta turn UUUUUUU UUUUUUU  
 Disordered termini  
 ARG rich RRRRRRRRRRRRRRRRRRRR  
 61 TLNDLILENTRHKKIKAGVVSFHFVRPEMKG VNVTDLVQ QRMFALGTVGLTTC EIKFDI 120  
 Beta sheet  
 Beta turn  
 Disordered termini  
 ARG rich  
 121 DEAAAGPKLSAIAQKSVGTAPSWLTMRRNFFKQLNNGTTEIADLPRPVGYRIAAIHIKAA 180  
 Beta sheet  
 Beta turn  
 Disordered termini  
 ARG rich  
 181 GVD AVEFQIDG TKWRDLLKADNDYILEQY GKA VLDNTYTIDFMLEGDVYQSVLLDQMIQ 240  
 Beta sheet  
 Beta turn  
 Disordered termini  
 ARG rich  
 241 DLRLKIDSTMDEQAEIIVEYMGVWSRNGF 269

Protein P3 (P3) | Q9XJR6

Beta sheet  
 Beta turn  
 Disordered termini DDDDDDDDD  
 ARG rich  
 1 MNTSVPTSVPNTQSVWGNVSTGLDALISGWARVEQIKAAKASTGQGRVEQAMTPELDNGA 60  
 Beta sheet  
 Beta turn  
 Disordered termini  
 ARG rich  
 61 AVVVEAPKAAQPSETLVFGVPQK TLLLGF GLLVLGLV MRGNK 104

Protein P4 (P4) | Q37958

Beta sheet  
 Beta turn





Beta turn  
 Disordered termini  
 ARG rich  
 241 SESSPEIPITLTIAPMCCEFNGLRNITLPRQLQ 272

Capsid (VP3) | P22055 [342 - 581]

Beta sheet  
 Beta turn  
 Disordered termini  
 ARG rich  
 1 GLPVMNTPGSNQYLTA DNFQSPCALPEFDVTPPIDIPGEVKMMELAEIDTMI PFDLSAT 60  
 SSSSSSSSSSSSSS  
 Beta sheet  
 Beta turn UUUUUUUUU  
 Disordered termini  
 ARG rich RRRRRRRRRRRRRR  
 61 KKNTMEMYRVRLSDKPH TDDPILCLSLSPASDPRLSHTMLGEILNY YTHWAGSLKFTFLF 120  
 SS  
 Beta sheet  
 Beta turn UUUU  
 Disordered termini  
 ARG rich  
 121 CGFMMATGKLLVSYAPP GADPPKKRKEAMLGTHVIWDIGLQSSCTMVVPWISNTTYRQTI 180  
 SSSSSSSSSSSS  
 Beta sheet  
 Beta turn  
 Disordered termini DDDDDD  
 ARG rich  
 181 DDSFTEGGYISVFYQ TRIVVPLSTPREMDILGFVSACNDFSVRLLRD TTHIEQKALAQ 238

Inner capsid (VP4) | P22055 [2 - 69]

Beta sheet  
 Beta turn  
 Disordered termini  
 ARG rich  
 1 GAQVSSQKVGAHENS NRAYGGSTINYTTINYRDSASNAASKQDFSQDPSKFTEPIKDVL 60  
 Beta sheet  
 Beta turn  
 Disordered termini  
 ARG rich  
 61 IKTAPMLN 68

Viral protein genome linked (VPg) | P22055 [1541 - 1562]

Beta sheet  
 Beta turn  
 Disordered termini D  
 ARG rich  
 1 GAYTGLPNKKPNVPT IRTAKVQ 22

Enterobacteria phage PR772

Proximal tail-tube connector (P11) | P68930

Beta sheet  
 Beta turn  
 Disordered termini  
 ARG rich  
 1 MEKVKAWLIKWKWVIAA IGGLA AFLLLLKNRGGSGGGGEYMGSGFPVYQQAGSGAVDNT 60  
 Beta sheet  
 Beta turn  
 Disordered termini  
 ARG rich  
 61 MALAALQANTQLSAQNA QLQAQMDASRLQLETQLNIETLAADNAHYSTQSQLQLGMAQVD 120  
 Beta sheet  
 Beta turn  
 Disordered termini  
 ARG rich RRRRRRRRRR  
 121 LSKYLGDLQSTTSTAL AGMQSDTAKYQSNIQ LQAENIRANTSLAEIDAQKYIVGKQADIA 180  
 Beta sheet  
 Beta turn UUUUUUUUU



```

Disordered termini
ARG rich      181  RRRRRRRRR
                KYQAKTERRGQDYGFALGLLNFGGKFF 207

Endolysin (EC 3.2.1.17) (Beta-1,4-N-acetylmuramidase) (Lysozyme) (Lytic enzyme)
(Muramidase) (Protein P15) (P15) | P09009
Beta sheet
Beta turn                UUUUU
Disordered termini
ARG rich      1  RRRRRRRRRRRRRRRRRRRRRRRRRRRR
                MQYTLWDIISRVESNGNLKALRFEPEYYQRRMERGDWDNSIIQNIRAANKCSLGTARMIY 60

Beta sheet
Beta turn
Disordered termini
ARG rich      61  RRRRRRRRRRRRRRRRRRRRRRRRRRRR
                CSSWGAQVQIMGFNLYLNGAFNLSVAHFMEAYQVNEFRRFLLKNGLTEYTPERLASDKA 120

Beta sheet
Beta turn
Disordered termini
ARG rich      121  RRRRRRR
                ARVKFAKVYNGAESYADLILQACQFYGVK 149

Protein P16 (GpS) (Protein S) (P16) | P27392
Beta sheet
Beta turn
Disordered termini      DDDDDDDDDDDDDDDDDDDDDDDDDDD
ARG rich      1  MDKKKLLYVWGGGLVLILILWLWFRNRPAQVANSWEGPPYMTYNQPQAGSVTLPVAGYTS 60

Beta sheet
Beta turn
Disordered termini
ARG rich      61  PSPTLPNRRNSCGCNPAVSAAMAQGADLASKLTDSDITSQLNDYASSLNDYLASQAGV 117

Protein P18 (GpM) (Protein M) (P18) | P27389
Beta sheet
Beta turn                UUUU
Disordered termini
ARG rich      1  MPFGLIVIGIILAIAYRDTLGELFSIIKDVSKDAKGFGYWVLAAVILGFAASIKPIKEP 60

Beta sheet
Beta turn
Disordered termini      D
ARG rich      61  VNAFMILLMIVLLIRKGAIDQISNQLRGS 90

Major capsid protein (P2) | P15794
Beta sheet
Beta turn
Disordered termini
ARG rich      1  MANFNVPKLGVPVAAVFDIDNVPEDSSATGSRWLPSIYQGGNYWGGPQALHAQVSNFD 60

Beta sheet
Beta turn
Disordered termini
ARG rich      61  SSNRLPYNPRTEENNPAGNCAFANFPFGQYISNISSAQSVHRIYIDLNDEPLFSPNAAS 120

Beta sheet
Beta turn
Disordered termini
ARG rich      121  ITNGGNPTMSQDTGYHNIGPINTAYKAEIFRPVNPLPMSDTAPDPETLEPGQTEPLIKSD 180

Beta sheet
Beta turn
Disordered termini
ARG rich      181  GVYSNSGIASFIFDRPVTEPNPNWPLPPPVIPIIYPTPALGIGAAAAYGFGYQVTVYRW 240

Beta sheet

```





Beta turn  
Disordered termini  
ARG rich  
61 DFLGDVTVTMPDQTGORITARAGTQGYYPVLSTNLMKFIVSATIDGKFPNMFINFPIALGV 120

Beta sheet  
Beta turn UUUU  
Disordered termini  
ARG rich  
121 WPSGIKGDKGDGPAGPGAGGTVVVEDSGASFGESLLDITSEPGKILVKRISGGSGITVTD 180

Beta sheet  
Beta turn  
Disordered termini  
ARG rich  
181 YGDQVEIEASGGGGGGGVTDALSLMYSTSTGGPASIAANALDFDLGALTVNSVGTGL 240  
SSSSSSSSSSSS

Beta sheet  
Beta turn  
Disordered termini  
ARG rich  
241 TKSAAAGIQLAAGKSGLYQITMTVKNNVTVTGNYLLRVKYGSSDFVACPASSLTAGGTIS 300

Beta sheet  
Beta turn  
Disordered termini  
ARG rich  
301 LLIYCNVNLGVPSLDVLKFSLCNDGAALSNIINITAAKIN 340

Protein P6 (P6) | Q9XJR1

Beta sheet  
Beta turn  
Disordered termini  
ARG rich  
1 MDTEEIKEEMQEAAEAIAENAVETALETAAIKAEGAAAAAEQSAEQAAVMAATLAASVE 60

Beta sheet  
Beta turn  
Disordered termini  
ARG rich  
61 ANAAQQIAEHSEQVQTQEEKISWLENQVMAMASNLQMMQEAVTALTVSQSLTPEPSPVPA 120

Beta sheet  
Beta turn  
Disordered termini  
ARG rich  
121 VEVEAMPEAVTVEILPESAGDQQEAEVPSVGDQQETAPRKRFRAI 166  
DDDDDDDDDDDDDDDDDDDDDDDDDDDDDDDDDDDDDDDDDDDDDDDD

Peptidoglycan hydrolase P7 (P7) | Q9XJR8

Beta sheet  
Beta turn  
Disordered termini DD  
ARG rich  
1 MSGALQWWETIGAASAQYNLDPRLVAGVVQTESSGNPRTTSGVGAMGLMQLMPATAKSLG 60

Beta sheet  
Beta turn UUU  
Disordered termini  
ARG rich  
61 VTNAYDPTQNIYGAALLRENLDYGDVNTALLAYHGGTNQANWGAKTKSYPGKVMKNIN 120

Beta sheet  
Beta turn  
Disordered termini  
ARG rich  
121 LLFGNSGPVVTPAAGIAPVSGAQEMTAVNISDYTAPDLTGLTMGAGSPDFTGGASGSWGE 180

Beta sheet  
Beta turn  
Disordered termini  
ARG rich  
181 ENIPWYRVDKHVANAAGSAYDAVTDVAVSAPVEAAGNYALRGVVIIAAVAIVVGLYFLFQ 240

Beta sheet  
Beta turn  
Disordered termini  
ARG rich  
241 DEINSAAMKMI PAGKAAGAAKALA 265  
DDDDDDDDDDDD



Beta turn  
Disordered termini  
ARG rich  
181 GQLLFVTHSGSDGIETGDIIFLDCEVEFKGFPQPTASIVQKTVIDLGGTLTSFEGPSYLMPP 240  
SSSSSSS  
Beta sheet  
Beta turn  
Disordered termini  
ARG rich  
241 DAFITSSSFGLFVDVAGTYLLTLVVTCTSTG SVTVGGNSTLVGDGRAAYGSSNYIASIVF 300  
SSSSS  
Beta sheet  
Beta turn  
Disordered termini  
ARG rich  
301 TSSGVLSTTPSVQFSGSSGVS RVQMNICRCKQGNTFILG 339

Reovirus 3 (Dearing)

Inner capsid protein lambda-1 (L1) | P15024  
Beta sheet  
Beta turn  
Disordered termini  
ARG rich  
1 DDDDDDDDDDDDDDDDDDDDDDDDDDDDDDDDDDDDDDDDDDDDDDDDDDDDDDDDDDDDDDDDDDD  
RRRRRRRRRRRRRRRRRRRRRRRRRRRRRRRRRRRRRRRRRRRRRRRR  
MKRIPRKTGKSSGKGN DSTERADDGSSLRDKQNNKAGPATTEPGTSNREQYKARPGIA 60  
Beta sheet  
Beta turn  
Disordered termini  
ARG rich  
61 DDDDDDDDDDDDDDDDDDDDDDDDDDDDDDDDDDDDDDDDDDDDDDDDDDDDDDDDDDDDDDDDDDD  
RRRRRRRRRRRRRRRRRRRRRRRRRRRRRRRRRRRRRRRRRRRRRRRR  
SVQRATESAEMPKNND EGTDPDKKNTKGDLVNEHSEAKDEADEATKKQAKD TDKSKAQV 120  
Beta sheet  
Beta turn  
Disordered termini  
ARG rich  
121 DDDDDDDDDDDDDDDDDDDDDDDDDDDDDDDDDDDDDDDDDDDDDDDDDDDDDDDDDDDDDDDDDDD  
TYSDTGINNANELSRSGNVDNEGGSNQKPMSTRIAEATS AIVSKHPARVGLPPTASSGHG 180  
Beta sheet  
Beta turn  
Disordered termini  
ARG rich  
181 YQCHVCSAVLFSPLDLDAH VASHGLHG NMTLTSSDIQRHITEFISSWQNHPIVQVSADVE 240  
Beta sheet  
Beta turn  
Disordered termini  
ARG rich  
241 NKKTAQLLHADTPRLVTWDAGLCTSFKIVPIVPAQVPQDVLAYTFFTSSYAIQSPFPEAA 300  
Beta sheet  
Beta turn  
Disordered termini  
ARG rich  
301 UUUUUUU  
VSRIVVHTRWASNVD FDRDSSVIMAPP TENNIHLFKQLLNTETLSVRGANPLMFRANVLH 360  
Beta sheet  
Beta turn  
Disordered termini  
ARG rich  
361 UU  
MLLEFVLDNLYLNRHTGFSQDHTPFTEGANLRSLPGPDAEKWYSIMYPTRMGTPNVSKIC 420  
Beta sheet  
Beta turn  
Disordered termini  
ARG rich  
421 UUUUUUUUU  
NFVASCVRNRVGRFDRAQMMNGAMSEWVDFETSDALTVSIRGRWMARLARMNINPTEIE 480  
Beta sheet  
Beta turn  
Disordered termini  
ARG rich  
481 WALTERCAQGYVTVTSPYAPIVNRLMPYRISNAERQISQIIRIMNIGNNATVIQPV LQDIS 540  
Beta sheet  
Beta turn  
Disordered termini  
ARG rich  
541 VLLQRISPLQIDPTIISNTMSTVSESTTQTLSPASSILGKLRPSNSDFSSFRVALAGWLY 600  
Beta sheet

|                     |      |                                                                |             |
|---------------------|------|----------------------------------------------------------------|-------------|
| Beta turn           |      |                                                                |             |
| Disordered termini  |      |                                                                |             |
| ARG rich            |      |                                                                |             |
|                     | 601  | NGVVTVIDDSSYPKDGGSVTSLENLWDFFILALALPLTTDPCAPVKAFMTLANMMVGFE    | 660         |
| Beta sheet          |      |                                                                |             |
| Beta turn           |      | UU                                                             | UUUUU       |
| Disordered termini  |      |                                                                |             |
| ARG rich            |      |                                                                |             |
|                     | 661  | TIPMDNQIYTQSRASAFSTPHTWPRCFMNIQLISPIDAPILRQWAEIIHRYWPNPSQIR    | 720         |
| Beta sheet          |      |                                                                |             |
| Beta turn           |      |                                                                |             |
| Disordered termini  |      |                                                                |             |
| ARG rich            |      |                                                                |             |
|                     | 721  | YGAPNVFGSANLFTPPEVLLLPIHQPANVTTPTLDFTNELTNWRARVCELMKNLVDNQR    | 780         |
| Beta sheet          |      |                                                                |             |
| Beta turn           |      |                                                                |             |
| Disordered termini  |      |                                                                |             |
| ARG rich            |      |                                                                | RRRR        |
|                     | 781  | YQPGWTQSLVSSMRGTLDKLKLKLSMTPMYLQQLAPVELAVIAPMLFPFPFQVPYVRLDR   | 840         |
| Beta sheet          |      |                                                                |             |
| Beta turn           |      |                                                                |             |
| Disordered termini  |      |                                                                |             |
| ARG rich            |      | RRRRRRRRRRRRRR                                                 |             |
|                     | 841  | DRVPTMVGVTQRSDTITQPALSLSSTNTTVGVPLALDARAITVALLSGKYPPDLVTNVW    | 900         |
| Beta sheet          |      |                                                                |             |
| Beta turn           |      |                                                                |             |
| Disordered termini  |      |                                                                |             |
| ARG rich            |      |                                                                |             |
|                     | 901  | YADAIYPMYADTEVFSNLQRDMITCEAVQTLVTLVAQISETQYPVDRYLDWIPSLRASAA   | 960         |
| Beta sheet          |      |                                                                |             |
| Beta turn           |      |                                                                |             |
| Disordered termini  |      |                                                                |             |
| ARG rich            |      |                                                                |             |
|                     | 961  | TAATFAEWVNTSMKTAFDLSDMLLEPLLSGDPRMTQLAIQYQQYNGRTFNIIPEMPSVI    | 1020        |
| Beta sheet          |      |                                                                |             |
| Beta turn           |      |                                                                | UUUUUU      |
| Disordered termini  |      |                                                                |             |
| ARG rich            |      |                                                                |             |
|                     | 1021 | ADCVQLTAEVFNHEYNLFGIARGDIIIGRVQSTHLWSPLAPPDLVFDRTDTPGVHIFGRD   | 1080        |
| Beta sheet          |      |                                                                |             |
| Beta turn           |      | UU                                                             |             |
| Disordered termini  |      |                                                                |             |
| ARG rich            |      |                                                                |             |
|                     | 1081 | CRISFGMNGAAPMIRDETGLMVPFEGNWIFPLALWQMNTYFNQQFDWIKTGELRIRIE     | 1140        |
| Beta sheet          |      |                                                                |             |
| Beta turn           |      |                                                                |             |
| Disordered termini  |      |                                                                |             |
| ARG rich            |      |                                                                |             |
|                     | 1141 | MGAYPYMLHYDPRQYANAWNLTSAWLEEITPTSIPSVPFMVPISSDHDISSAPAVQYII    | 1200        |
| Beta sheet          |      |                                                                |             |
| Beta turn           |      |                                                                |             |
| Disordered termini  |      |                                                                |             |
| ARG rich            |      |                                                                |             |
|                     | 1201 | STEYNDRSLFCTNSSSPQTIAGPKHIPVERYNILTNPDPPTQIQLEPVDLYNVVTRY      | 1260        |
| Beta sheet          |      |                                                                |             |
| Beta turn           |      |                                                                |             |
| Disordered termini  |      |                                                                |             |
| ARG rich            |      |                                                                |             |
|                     | 1261 | AYETPPITAVVMGVP                                                | 1275        |
|                     |      |                                                                |             |
| Penton protein (L2) |      | P12538                                                         |             |
| Beta sheet          |      |                                                                |             |
| Beta turn           |      |                                                                | UUUUUUUUUUU |
| Disordered termini  |      |                                                                |             |
| ARG rich            |      |                                                                |             |
|                     | 1    | MANVWGVRLADSLSSPTIETRTRQYTLHDLCSDDLDPGREGPWKPLRNQRTNNIVAVQLF   | 60          |
| Beta sheet          |      |                                                                |             |
| Beta turn           |      |                                                                |             |
| Disordered termini  |      |                                                                |             |
| ARG rich            |      | RRRRRRRRRRRRRRRR                                               |             |
|                     | 61   | RPLQGLVLDLTQLYGFPAGFDDWERFMREKLRVLKYEVLRIYIPISNYSNEHVNVFVANALV | 120         |

Beta sheet  
 Beta turn  
 Disordered termini  
 ARG rich  
 121 GAFLSNQAFYDLLPLLIINDTMIGDLLGTGASLSQFFQSHGDVLEVAAGRKYLQMENYSN 180

Beta sheet  
 Beta turn  
 Disordered termini  
 ARG rich  
 181 DDDDPPLFAKDLSDYAKAFYSPTYEVLDRFFWTHDSSAGVLVHYDKPTNGHHYLLGTLTQ 240

Beta sheet  
 Beta turn  
 Disordered termini  
 ARG rich  
 241 MVSAPPYIIINATDAMLLESCLEQFSANVRARPAQPVTRLDQCYHLRWGAQYVGEDSLTYR 300

Beta sheet  
 Beta turn  
 Disordered termini  
 ARG rich  
 301 LGVLSLLATNGYQLARPIPRQLTNRWLSFVSVQIMSDGVNETPLWPQERYVQIAYDPSV 360

Beta sheet  
 Beta turn  
 Disordered termini  
 ARG rich  
 361 VDGTQYGYVRKNQLRLGMRISALQSLSDTPSPVQWLPQYTIQAAAMDEGLMVSRLTQL 420

Beta sheet  
 Beta turn  
 Disordered termini  
 ARG rich  
 421 PLRPDYGNIWVGDALSYVVDYNRSHRVLSSELPLPDTYFDGDEQYGRSLFSLARKIGD 480

Beta sheet  
 Beta turn  
 Disordered termini  
 ARG rich  
 481 RSLVKDTAVLKHAYQAIDPNTGKEYLRSRQSVAYFGASAGHSGADQPLVIEPWIQKISG 540

Beta sheet  
 Beta turn  
 Disordered termini  
 ARG rich  
 541 VPPSSVRQFGYDVARGAIVDLARPPSGDYQFVYSDVDQVVDGHDDLSSISSGLVESLLS 600

Beta sheet  
 Beta turn  
 Disordered termini  
 ARG rich  
 601 SCMHATAPGGSFVVKINFPTRPVWHYIEQKILPNITSYMLIKPFVTNNVELFFVAFGVHQ 660

Beta sheet  
 Beta turn  
 Disordered termini  
 ARG rich  
 661 HSSLTWTSGVYFFLVDHFYRYETLSTISRQLPSFGYVDDGSSVTGIETISIENPGFSNMT 720

Beta sheet  
 Beta turn  
 Disordered termini  
 ARG rich  
 721 QAARIGISGLCANVGNARKSIAIYESHGARVLTITRRSPASARRKSRLRYLPLIDPRSL 780

Beta sheet  
 Beta turn  
 Disordered termini  
 ARG rich  
 781 EVQARTILPADPVL FENVSGASPHVCLTMMYNFEVSSAVYDGDVLDLGTGPEAKILELI 840

Beta sheet  
 Beta turn  
 Disordered termini  
 ARG rich  
 841 PATSPVTCVDIRPTAQPSGCWNVRTTFLELDYLSDGWITGVRGDIVTCMLSLGAAAAGKS 900

Beta sheet  
 Beta turn  
 Disordered termini  
 ARG rich  
 901 MTFDAAFQQLIKVLSKSTANVVLVQVNCPTDVVRSIKGYLEIDSTNKRYRFPKFGRDEPY 960

Beta sheet  
 Beta turn

U



Disordered termini  
 ARG rich  
 961 SDMDALEKICRTAWPNCISITWVPLSYDLRWTRLALLESTTLSSASIRIAELMYKYPIMR 1020  
 Beta sheet  
 Beta turn  
 Disordered termini  
 ARG rich  
 1021 IDIHGLPMEKRGNFIVGQNCSLVIPGFNAQDVFNCYFNSALAFSTEDVNAAMIPQVSAQF 1080  
 Beta sheet  
 Beta turn  
 Disordered termini  
 ARG rich  
 1081 DATKGEWTLDVMVFS DAGIYTMQALVGSNANPVSLGSFVVDSPVDITDAWPAQLDFTIAG 1140  
 Beta sheet  
 Beta turn  
 Disordered termini  
 ARG rich  
 1141 TDVDITVNPYYRLMTFVRIDGQWQIANPKFQFFSSASGTLVMNVKLDIADKYLLEYIRD 1200  
 Beta sheet  
 Beta turn  
 Disordered termini  
 ARG rich  
 1201 VQSRDVGFFYIQHPLQLLNTITLPTNEDLFLSAPDMREWAVKESGNTICILNSQGFVLPQD 1260  
 Beta sheet  
 Beta turn  
 Disordered termini  
 ARG rich  
 1261 WDVLTDTISWSPSIPTYIVPPGDYTLTPL 1289  
  
 Hexon protein (L3) | P04133  
 Beta sheet  
 Beta turn  
 Disordered termini  
 ARG rich  
 1 MSSMILTQFGPFIESISGITDQSNDFEDAAKAFSMFTRSDVYKALDEIPFSDAMLPIP 60  
 Beta sheet  
 Beta turn  
 Disordered termini  
 ARG rich  
 61 PTIYTKPSHDSYYYIDALNRVRRKTYQGPDVYVPNC SIVELLEPHETLTSYGR LSEAIE 120  
 Beta sheet  
 Beta turn  
 Disordered termini  
 ARG rich  
 121 NRAKDGDSQARIATTYGR IAESQARQIKAPLEKFV LALLVAEAGGS LYDPVLQKYDEIPD 180  
 Beta sheet  
 Beta turn  
 Disordered termini  
 ARG rich  
 181 LSHNCPLWCFREICRHISG PLPDRAPYLYLSAGV FVWLMSPRMTSAIPPLSDLVNLAILQ 240  
 Beta sheet  
 Beta turn  
 Disordered termini  
 ARG rich  
 241 QTAGLDPSLVKLG VQICLHAAASSYSW FIFLKT KSIFPQNTLHSMY ESLEGGYCPNLEWL 300  
 Beta sheet  
 Beta turn  
 Disordered termini  
 ARG rich  
 301 EPRSDYKFM YMGV MPLSAKYARSAPSNDK KARELGEKYGLSSVVGELRKRRTKYVKH DFA 360  
 Beta sheet  
 Beta turn  
 Disordered termini  
 ARG rich  
 361 SVRYIRDAMACTSGIFLVR TPETETVLQEY TQSPEIKVPI PQKDWTFIGEIRILKDTTSS 420  
 Beta sheet  
 Beta turn  
 Disordered termini  
 ARG rich  
 421 IARYLYRTWYLA AARMAAQPR TDPLFQAIMRSQYVTARGGSGAALRESLYAINVSLPDF 480  
 Beta sheet

Beta turn  
 Disordered termini  
 ARG rich  
 481 KGLPVKAATKIFQAAQLANLFPSSHTSVAILADTSMGLRNQVQRRPRSIMPLNVPQQQVSA 540

Beta sheet  
 Beta turn  
 Disordered termini  
 ARG rich  
 541 PHTLTADYINYHMNLSPTSGSAVIEKVIPLGVYASSPPNQSINIDISACDASITWDFFLS 600  
 UUUUUUUU

Beta sheet  
 Beta turn  
 Disordered termini  
 ARG rich  
 601 VIMAAIHEGVASSSIGKPFMGVPASIVNDESUVGVRAARPISGMQNMIOHLSKLYKRGFS 660

Beta sheet  
 Beta turn  
 Disordered termini  
 ARG rich  
 661 YRVNDSFSPGNDFTHTTTTTFSPGSTATSTEHTANNSTMETFLTVMGPEHTDDDPDLRLM 720

Beta sheet  
 Beta turn  
 Disordered termini  
 ARG rich  
 721 KSLTIQRNYVCQGGDGLMIIDGTTAGKVNSETIQNDLELISKYGEFEGWKYDIAYDGTAE 780

Beta sheet  
 Beta turn  
 Disordered termini  
 ARG rich  
 781 YLKLYFIFGCRIPNLSRHPVIGKERANSSAEEPWPAILDQIMGVFFNGVHDGLQWQRWIR 840

Beta sheet  
 Beta turn  
 Disordered termini  
 ARG rich  
 841 YSWALCCAFSRQRTMIGESVGYLQYPMWSFVYWGLPLVKAFGSDPWIFSWYMPDGLGMY 900

Beta sheet  
 Beta turn  
 Disordered termini  
 ARG rich  
 901 SWISLIRPLMTRWMVANGYVTDRCSTVFGNADYRRCFNELKLYQGYMAQLPRNPKKSGR 960  
 RRRRRRRR

Beta sheet  
 Beta turn  
 Disordered termini  
 ARG rich  
 961 RRRRRRRR RRRRRRRRRRRR  
 AASREVREQFTQALS DYLMQNPELKSRLRGRSEWEKYGAGIIHNPPSLFDVPHKWKYQGA 1020

Beta sheet  
 Beta turn  
 Disordered termini  
 ARG rich  
 1021 UUUUUU  
 QEAAIATREELAEMDETLMRARRHSYSSFSKLEAYLLVKWRMCEAREPSVDLRLPLCAG 1080

Beta sheet  
 Beta turn  
 Disordered termini  
 ARG rich  
 1081 IDPLNSDPFLKMSVSGPMLQSTRKYFAQTLFMAKTVSGLDVNAIDSALLRLRLTGADKKA 1140

Beta sheet  
 Beta turn  
 Disordered termini  
 ARG rich  
 1141 UUUUUU  
 LTAQLLMVGLQESEADALAGKIMLQDVNTVQLARVVNLAVPDTWMSLDFDSMFKHHVKLL 1200

Beta sheet  
 Beta turn  
 Disordered termini  
 ARG rich  
 1201 UUUUUU  
 PKDGRHLNTDIPPRMGWLRAILRFLGAGMVTATGVAVDIYLEDIHGGGRSLGQRFMTWM 1260

Beta sheet  
 Beta turn  
 Disordered termini  
 ARG rich  
 1261 D  
 RQEGRSA 1267

|                                                         |     |                                                                |                     |
|---------------------------------------------------------|-----|----------------------------------------------------------------|---------------------|
| Beta sheet                                              |     |                                                                |                     |
| Beta turn                                               |     |                                                                |                     |
| Disordered termini                                      |     | DDDD                                                           |                     |
| ARG rich                                                |     |                                                                |                     |
|                                                         | 1   | MGNASSIVQTTINVTGDGNVFKPSAETSSTAVPSLSLSPGMLNPGGVPWIAVGDETSVTSP  | 60                  |
| Beta sheet                                              |     |                                                                |                     |
| Beta turn                                               |     |                                                                |                     |
| Disordered termini                                      |     |                                                                |                     |
| ARG rich                                                |     |                                                                |                     |
|                                                         | 61  | GALRRMTSKDIPETAIINTDNSSGAVPSESALVPYIDEPLVVVTEHAITNFTKAEMALEF   | 120                 |
| Beta sheet                                              |     |                                                                |                     |
| Beta turn                                               |     | UUU                                                            |                     |
| Disordered termini                                      |     |                                                                |                     |
| ARG rich                                                |     |                                                                |                     |
|                                                         | 121 | NREFLDKMRVLSVSPKYSDLLTYVDCYVGV SARQALNNFQKQVPVITPTRQTMVDSIQA   | 180                 |
| Beta sheet                                              |     |                                                                |                     |
| Beta turn                                               |     |                                                                |                     |
| Disordered termini                                      |     |                                                                |                     |
| ARG rich                                                |     |                                                                | RRRRRRRRRRR         |
|                                                         | 181 | ALKALEKWEIDLRVAQTLPTNP IGEVSCPMQSVVKLLDDQLPDDSLIRRYPKAAVAL     | 240                 |
| Beta sheet                                              |     |                                                                |                     |
| Beta turn                                               |     |                                                                |                     |
| Disordered termini                                      |     |                                                                |                     |
| ARG rich                                                |     | RRR                                                            |                     |
|                                                         | 241 | AKRNGGIQWMDVSEGTVMNEAVNAVAASALAPSASAPPLEEKSKLTEQAMDLVTA AEPEI  | 300                 |
| Beta sheet                                              |     |                                                                |                     |
| Beta turn                                               |     |                                                                |                     |
| Disordered termini                                      |     |                                                                |                     |
| ARG rich                                                |     |                                                                |                     |
|                                                         | 301 | IASLAPVPAPVFAIPPKPADYNVRTLRIDEATWLRMIPKSMNTPFQIQVTDNTGTNWHLN   | 360                 |
| Beta sheet                                              |     |                                                                |                     |
| Beta turn                                               |     |                                                                |                     |
| Disordered termini                                      |     |                                                                |                     |
| ARG rich                                                |     |                                                                |                     |
|                                                         | 361 | LRGGTRVVNLDQIAPMRFVLDLGGKSYKETSWDPNGKKGVFIVFQSKIPFELWTAASQIG   | 420                 |
| Beta sheet                                              |     |                                                                |                     |
| Beta turn                                               |     |                                                                |                     |
| Disordered termini                                      |     |                                                                |                     |
| ARG rich                                                |     |                                                                |                     |
|                                                         | 421 | QATVVNYVQLYAEDSSFTAQSI IATTSLAYNYEPEQLNKTDPEMNYLLATFIDSAAITP   | 480                 |
| Beta sheet                                              |     |                                                                |                     |
| Beta turn                                               |     |                                                                |                     |
| Disordered termini                                      |     |                                                                |                     |
| ARG rich                                                |     |                                                                |                     |
|                                                         | 481 | TNMTQPDVWDALLTMSPLSAGEVTVKGAVVSEVVPADLIGSYTPESLNASLPNDAARCM I  | 540                 |
| Beta sheet                                              |     |                                                                |                     |
| Beta turn                                               |     |                                                                |                     |
| Disordered termini                                      |     |                                                                |                     |
| ARG rich                                                |     |                                                                |                     |
|                                                         | 541 | DRASKIAEAIKIDDDAGPDEYSPNSVPIQQLAISQLETGYGVRIFNPKGILSKIASRAM    | 600                 |
| Beta sheet                                              |     |                                                                |                     |
| Beta turn                                               |     | UUUUUUU                                                        |                     |
| Disordered termini                                      |     |                                                                |                     |
| ARG rich                                                |     |                                                                | RRRRRRRRRRRRRRRRRRR |
|                                                         | 601 | QAFIGDPSTIIITQAAPVLSDKNNWIALAQGVKTSLRTKSLSAGVKTA VSKLSSSESIQNW | 660                 |
| Beta sheet                                              |     |                                                                |                     |
| Beta turn                                               |     |                                                                |                     |
| Disordered termini                                      |     | DDDDDDDDDDDDDDDDDDDDDDDDDDDD                                   |                     |
| ARG rich                                                |     |                                                                | RRRRRRRRRRRRRRRRRRR |
|                                                         | 661 | TQGFLDKVS AHFPAPKPCPTSGDSGESSNRRVKRDSYAGVVKRGYTR               | 708                 |
|                                                         |     |                                                                |                     |
| Inner microtubule-associated protein mu-2 (M2)   P12418 |     |                                                                |                     |
| Beta sheet                                              |     |                                                                |                     |
| Beta turn                                               |     |                                                                |                     |
| Disordered termini                                      |     |                                                                |                     |
| ARG rich                                                |     |                                                                |                     |
|                                                         | 1   | MAYIAPVAVVDSRSSEAIGLLESFGVDAGADANDVSYQDHDYVLDQLQYMLDGYEAGDVI   | 60                  |
| Beta sheet                                              |     |                                                                |                     |
| Beta turn                                               |     | UUUUUUU                                                        |                     |
| Disordered termini                                      |     |                                                                |                     |
| ARG rich                                                |     |                                                                | RRRRRRRRRRRRRRRRRRR |

|                                            |     |                                                                |             |
|--------------------------------------------|-----|----------------------------------------------------------------|-------------|
|                                            | 61  | DALVHKNWLHHSVYCLLPKSQLLEYWKSNPSPAI PDNVDRRLRKRMLMLKDLRKDDEYNQ  | 120         |
| Beta sheet                                 |     |                                                                |             |
| Beta turn                                  |     |                                                                |             |
| Disordered termini                         |     |                                                                |             |
| ARG rich                                   |     | RRRRRR                                                         |             |
|                                            | 121 | LARAFKISDVYAPLISSTTSPMTMIQNLNRGEIVYTTTDRVIGARILLYAPRKYYASTLS   | 180         |
| Beta sheet                                 |     |                                                                |             |
| Beta turn                                  |     |                                                                |             |
| Disordered termini                         |     |                                                                |             |
| ARG rich                                   |     |                                                                |             |
|                                            | 181 | FTMTKCIIPFGKEVGRVPHSRFNVGTFPSIATPKCFVMSGVDIESIPNEFIKLFYQRVKS   | 240         |
| Beta sheet                                 |     |                                                                |             |
| Beta turn                                  |     | UUUUUUU                                                        | UUUUUUUUUUU |
| Disordered termini                         |     |                                                                |             |
| ARG rich                                   |     | RRRRRRRRRRRRR                                                  |             |
|                                            | 241 | VHANILNDISPQIVSDMINRKRLRVHTPSDRRAAQLMHLPHYHVKRGASHVDVYKVDVDM   | 300         |
| Beta sheet                                 |     |                                                                |             |
| Beta turn                                  |     |                                                                |             |
| Disordered termini                         |     |                                                                |             |
| ARG rich                                   |     |                                                                |             |
|                                            | 301 | LFEVVDVADGLRNVSRKLTMTHTVPVCILEMLGIEIADYCIHQEDGMLTDWFLLLTMLS DG | 360         |
| Beta sheet                                 |     | SSSSSSSSSSSSSSSSSS                                             |             |
| Beta turn                                  |     | UUUU                                                           | UUUUU       |
| Disordered termini                         |     |                                                                |             |
| ARG rich                                   |     |                                                                |             |
|                                            | 361 | LTDRRTHCQYLMNPSSVPPDVILNISITGFINRHTIDVMPDIYDFVKPIGAVLPKGSFKS   | 420         |
| Beta sheet                                 |     |                                                                |             |
| Beta turn                                  |     |                                                                |             |
| Disordered termini                         |     |                                                                |             |
| ARG rich                                   |     |                                                                |             |
|                                            | 421 | TIMRVLDSISILGIQIMPRAHVVDSDVEGQMEPTFEQAVMEIYKGIAGVDSLDDLKQW     | 480         |
| Beta sheet                                 |     |                                                                |             |
| Beta turn                                  |     |                                                                |             |
| Disordered termini                         |     |                                                                |             |
| ARG rich                                   |     |                                                                |             |
|                                            | 481 | LNSDLIPHDDRLGQLFQAFLLPLAKDLLAPMARKFYDNSMSEGRLLTFHADSELLNANYF   | 540         |
| Beta sheet                                 |     |                                                                |             |
| Beta turn                                  |     | UUUU                                                           |             |
| Disordered termini                         |     |                                                                |             |
| ARG rich                                   |     |                                                                |             |
|                                            | 541 | GHLRLKIPYITEVNLMIKRNREGGELFQLVLSYLYKMYATSAPKWFGLLRLLICPWL      | 600         |
| Beta sheet                                 |     |                                                                |             |
| Beta turn                                  |     |                                                                |             |
| Disordered termini                         |     |                                                                |             |
| ARG rich                                   |     |                                                                |             |
|                                            | 601 | HMEKLIGEADPASTSAEIGWHIPREQLMQDGWCGCEDGFIPYVSIRAPRLVIEELMEKNW   | 660         |
| Beta sheet                                 |     |                                                                |             |
| Beta turn                                  |     | UUUUUUUUUUUUUUUUUUUU                                           |             |
| Disordered termini                         |     |                                                                |             |
| ARG rich                                   |     |                                                                |             |
|                                            | 661 | GQYHAQVIVTDQLVVGEP RRVSAKAVIKGNHLPVKLVSRFACFTLTAKYEMRLSCGHSTG  | 720         |
| Beta sheet                                 |     |                                                                |             |
| Beta turn                                  |     |                                                                |             |
| Disordered termini                         |     |                                                                |             |
| ARG rich                                   |     |                                                                |             |
|                                            | 721 | RGAAYSARLAFRSDLA                                               | 736         |
| Outer capsid protein sigma-1 (S1)   P03528 |     |                                                                |             |
| Beta sheet                                 |     |                                                                |             |
| Beta turn                                  |     |                                                                |             |
| Disordered termini                         |     |                                                                |             |
| ARG rich                                   |     |                                                                |             |
|                                            | 1   | MDPRLREEVVRLLIIALTS DNGASLSKGLSERVSALEKTSQIHSDTILRITQGLDDANKRI | 60          |
| Beta sheet                                 |     |                                                                |             |
| Beta turn                                  |     |                                                                |             |
| Disordered termini                         |     |                                                                |             |
| ARG rich                                   |     |                                                                |             |
|                                            | 61  | I ALEQSRDDLVASVSDAQLAISRLSSIGALQTVVNGLDSSVTQIGARVGGLETGLAELR   | 120         |
| Beta sheet                                 |     |                                                                |             |
| Beta turn                                  |     |                                                                |             |
| Disordered termini                         |     |                                                                |             |

ARG rich  
 121 VDHDNLVARVDTAERNIGSLTTELSTLTLRVTSIQADFESRISTLERTAVTSAGAPLSIR 180  
 Beta sheet  
 Beta turn  
 Disordered termini  
 ARG rich  
 181 NNRMTMGLNDGLTSLGNLAIIRLPGNTGLNIQNGGLQFRFNTDQFQIVNNNLTKTTVFD 240  
 Beta sheet  
 Beta turn  
 Disordered termini  
 ARG rich  
 241 SINSRIGATEQSYVASAVTPLRLNSSTKVLDMMLIDSSTLEINSSGQLTVRSTSPNLRYP 300  
 Beta sheet  
 Beta turn  
 Disordered termini  
 ARG rich  
 301 ADVSGGIGMSPNYRFRQSMWIGIVSYSGSGLNWRVQVNSDIFIVDDYIHICLPAFDGFSI 360  
 Beta sheet  
 Beta turn  
 Disordered termini  
 ARG rich  
 361 ADGGDLSLNFVTGLLPLLLTGDTEPAFHNDVVTYGAQTVAIGLSSGGAPQYMSKNLWVEQ 420  
 Beta sheet  
 Beta turn  
 Disordered termini  
 ARG rich  
 421 WQDGVLRRLRVEGGGSITHSNSKWPAMTVSYPRSFT 455

Inner capsid protein sigma-2 (S2) | P03525

Beta sheet  
 Beta turn  
 Disordered termini  
 ARG rich  
 1 MARAAFLFKTVGFGGLQNVPIDELSSHLLRAGNSPWQLTQFLDWISLGRGLATSALVPT 60  
 Beta sheet  
 Beta turn  
 Disordered termini  
 ARG rich  
 61 AGSRYYQMSCLLSGTLQIPFRPNHRWGDIFRFLRVWSAPTLDGLVVAPPQVLAQPALQAQ 120  
 Beta sheet  
 Beta turn  
 Disordered termini  
 ARG rich  
 121 ADRVYDCDDYPFLARDPRFKHRVYQQLSAVTLNLTGFPGPISYVRVDEDMWSGDVNQLLM 180  
 Beta sheet  
 Beta turn  
 Disordered termini  
 ARG rich  
 181 NYFGHTFAEIAIAYTLCQASANRPWEYDGTYARMTQIVLSLFWLSYVGVHQQNTYRTFYFQ 240  
 Beta sheet  
 Beta turn  
 Disordered termini  
 ARG rich  
 241 CNRRGDAAEVWILSCSLNHSAQIRPGNRSLFVMPTSPDWNMDVNLILSSTLTGCLCSGSQ 300  
 Beta sheet  
 Beta turn  
 Disordered termini  
 ARG rich  
 301 LPLIDNNSVPAVSRNIHGWTGRAGNQLHGFQVRRMVTEFCDRLRRDGVMTQAQQNQVEAL 360  
 Beta sheet  
 Beta turn  
 Disordered termini  
 ARG rich  
 361 ADQTQQFKRKLETWAREDDQYNQAHPNSTMFRTKPFNTAQWGRGNTGATSAAIAALI 418

Outer capsid protein sigma-3 (S3) | P03527

Beta sheet  
 Beta turn  
 Disordered termini  
 ARG rich

|                    |     |                                                               |                  |
|--------------------|-----|---------------------------------------------------------------|------------------|
|                    | 1   | MEVCLPNGHQVVDLINNAFEGRVSIYSAQEGWDKTISAQPDMMVCGGAVVCMHCLGVVGS  | 60               |
| Beta sheet         |     |                                                               |                  |
| Beta turn          |     | UUUUUUUUUU                                                    |                  |
| Disordered termini |     |                                                               |                  |
| ARG rich           |     | RRRRRRRRRRRRRRRR                                              |                  |
|                    | 61  | LQRKCLKHLPHHRCNQQIRHQDYVDVQFADRVTAHWKRGMLSFVAQMHEMMNDVSPDDLDR | 120              |
| Beta sheet         |     |                                                               |                  |
| Beta turn          |     |                                                               |                  |
| Disordered termini |     |                                                               |                  |
| ARG rich           |     |                                                               |                  |
|                    | 121 | VRTEGGSLVELNLWLQVDPNSMFRSIHSSWTDPLQVDDLDLTKLDQYWTALNLMIDSSDLI | 180              |
| Beta sheet         |     |                                                               |                  |
| Beta turn          |     | UUUUU                                                         |                  |
| Disordered termini |     |                                                               |                  |
| ARG rich           |     |                                                               | RRRRRRR          |
|                    | 181 | PNFMMDPSHAFNGVKLGGDARQTQFSRTFDSRSSLEWGMVYDYSELEHDPKGRAYRK     | 240              |
| Beta sheet         |     |                                                               |                  |
| Beta turn          |     |                                                               |                  |
| Disordered termini |     |                                                               |                  |
| ARG rich           |     | RRRRRRR                                                       | RRRRRRRRRRRRRRRR |
|                    | 241 | ELVTPARDFGHFGLSHYSRATTPILGKMPAVFSGMLTGNCKMYPFIKGTAKLKTVRKLVE  | 300              |
| Beta sheet         |     |                                                               |                  |
| Beta turn          |     |                                                               |                  |
| Disordered termini |     |                                                               |                  |
| ARG rich           |     |                                                               |                  |
|                    | 301 | AVNHAWGVEKIRYALGPGGMTGWYNRTMQQAPIVLTPAALTMFPDTIKFGDLNYPVMIGD  | 360              |
| Beta sheet         |     |                                                               |                  |
| Beta turn          |     |                                                               |                  |
| Disordered termini |     |                                                               |                  |
| ARG rich           |     |                                                               |                  |
|                    | 361 | PMILG                                                         | 365              |

Southern bean mosaic virus  
Capsid (CP) | P03601

|                    |     |                                                              |         |
|--------------------|-----|--------------------------------------------------------------|---------|
| Beta sheet         |     |                                                              |         |
| Beta turn          |     |                                                              |         |
| Disordered termini |     | DDDDDDDDDDDDDDDDDDDDDDDDDDDDDDDDDDDDDDDDDDDDDDDDDDDDDDDDDDDD |         |
| ARG rich           |     | RRRRRRRRRRRRRRR                                              |         |
|                    | 1   | MAKRLTKQQLTKAIANTLEAPATQSRPRNRNRNRNRSAARQPQSTQAGVSMAPIAQGTMR | 60      |
| Beta sheet         |     |                                                              | SSSSSSS |
| Beta turn          |     |                                                              |         |
| Disordered termini |     |                                                              |         |
| ARG rich           |     |                                                              |         |
|                    | 61  | LREPSLRTAGGVTVLTHSELSTELSVTNAIVITSELVMPYTMGTWLRGVAANWSKYSLLS | 120     |
| Beta sheet         |     | SSSSSSS                                                      |         |
| Beta turn          |     |                                                              |         |
| Disordered termini |     |                                                              |         |
| ARG rich           |     |                                                              |         |
|                    | 121 | VRYTYLPSCPSTTSGSIHMGFYDMADTLFVSVNQLSNLRGYVSGQVWSGSSGLCYINGT  | 180     |
| Beta sheet         |     |                                                              |         |
| Beta turn          |     |                                                              |         |
| Disordered termini |     |                                                              |         |
| ARG rich           |     |                                                              |         |
|                    | 181 | RCLDTANAITTTLDVGQLGKKWYPFKTSTDFTTAVGVNVNIATPLVPARLIAMLDGSSS  | 240     |
| Beta sheet         |     | SSSSSSSSSSSSSS                                               |         |
| Beta turn          |     |                                                              |         |
| Disordered termini |     |                                                              | D       |
| ARG rich           |     |                                                              |         |
|                    | 241 | TAVSTGRLYVSYTIQLEPTALALNN                                    | 266     |

Scrophularia mottle virus  
Capsid (CP) | P03601  
Beta sheet  
Beta turn

Disordered termini DDD  
 ARG rich  
 1 MEEVKPIKVQQPSIPAPGTKLVPNDGQQSPAMVMPFQLTVTDFGVKETSQITLSSDPGI 60  
 Beta sheet  
 Beta turn UU  
 Disordered termini  
 ARG rich  
 61 AAITASYRHASIVECQAVLFPNRTSSSNPTHCDLVWVPANSTASPTTILKTFGGSRFTLG 120  
 Beta sheet SSSSSSSSSSS  
 Beta turn  
 Disordered termini  
 ARG rich  
 121 GPITANQIITIPPLDSVNCRIKDSVLYTDSPRLLAHSPAPSTTQTVPSGSLIIRGKIRL 180  
 Beta sheet  
 Beta turn  
 Disordered termini  
 ARG rich  
 181 SSPLLQPSSSS 191

Simian rotavirus A (SA11)

RNA-directed RNA polymerase (RdRp) | A2T3S0  
 Beta sheet  
 Beta turn  
 Disordered termini  
 ARG rich  
 1 MGKYNLILSEYLSFIYNSQSAVQIPIIYSSNSELENRCIEFHSKCLENKNGLSLRKLFV 60  
 Beta sheet  
 Beta turn UUUUUUUUUU  
 Disordered termini  
 ARG rich RRRRRRRRRRRRRRRR  
 61 EYNDVIENATLLSILSYSYDKYNAVERKLVKYAKGKPLEADLTVNELDYENNKITSELP 120  
 Beta sheet  
 Beta turn  
 Disordered termini  
 ARG rich RRRRRRRRRRRRRRRR RR  
 121 TAEYTDLSLMDPAILTSLSSNLNAVVMFWLEKHENDVAEKLKVYKRRLDLFTIVASTINKY 180  
 Beta sheet  
 Beta turn UUUUUUU UUU  
 Disordered termini  
 ARG rich RRRRRRRRRRRRRRRRRR  
 181 GVPRHNAKYRYEYDVMKDKPYLVWTWANSSEIEMLSVFSHDDYLIAKELIVLVSYSNRSTL 240  
 Beta sheet  
 Beta turn  
 Disordered termini  
 ARG rich  
 241 AKLVSSPMSILVALVDINGTFITNEELELEFSNKYVRAIVPDQTFDELNQMLDNMRKAGL 300  
 Beta sheet  
 Beta turn  
 Disordered termini  
 ARG rich  
 301 VDIPKMIQDWLVDRSIEKFPLMAKIYSWSFHVGFQRKQMLDAALDQLKTEYTENVDDEMY 360  
 Beta sheet UUUUUUUU  
 Beta turn  
 Disordered termini  
 ARG rich RRRRRRRRRRRRRRRR  
 361 REYTMLIRDEVVKMLEEPVKHDDHLLRDSELAGLLSMSSASNGESRQLKFGKRKTIFSTKK 420  
 Beta sheet  
 Beta turn  
 Disordered termini  
 ARG rich RRRRRRRRRRRRRRRR  
 421 NMHVMDMANERYTPGIIPPVNVDKPIPLGRRDVPGRRTRIIFILPYEYFIAQHAVVEKM 480  
 Beta sheet  
 Beta turn UUUU  
 Disordered termini  
 ARG rich  
 481 LIYAKHTREYAEFYSQSNQLLSYGDVTRFLSNNTMVLYTDVSWDSSQHNTQPFKGIIM 540  
 Beta sheet  
 Beta turn

```

Disordered termini
ARG rich          541   GLDILANMTNDAKVLQTLNLKYQTQINLMDSYVQIPDGNVIKKIQYGAVASGEKQTKAAN 600
Beta sheet
Beta turn          UUUUUU
Disordered termini
ARG rich          601   RRRRRRRRRRRRRRRRRRRRR
SIANLALIKTVLSRISNKHFSFATKIIRVDGDDNYAVLQFNTEVTKQMIQDVSNDVRETYA 660
Beta sheet
Beta turn          UU
Disordered termini
ARG rich          661   RRRRRRRRRRRRRRRRRRRRR
RMNAKVKALVSTVGI EI AKRY IAGGKI FFRAGINLLNNEKRGQSTQWDQAAILYSNYIVN 720
Beta sheet
Beta turn          UUU
Disordered termini
ARG rich          721   RLRGFETDREFILTKIMQMTSVAITGSLRFLFPSERVLTTNSTFKVDFSEDFIIEYGTDD 780
Beta sheet
Beta turn
Disordered termini
ARG rich          781   EVYIQRAFMSLSSQKSGIADEIAASSTFKNYVTRLSEQLLFSKNNIVSRGIALTEKAKLN 840
Beta sheet
Beta turn          UUUU
Disordered termini
ARG rich          841   RRRRRRRRRRRRRRRRRRRRR
SYAPISLEKRRRAQISALLTMLQKPVTFKSSKITINDILRDIKPFFTVSDAHLPIQYQKFM 900
Beta sheet
Beta turn
Disordered termini
ARG rich          901   PTLPDNVQYIIQCI GSRTYQIEDDGSKSAISRLISKYSVYKPSIEELYKVISLHENEIQL 960
Beta sheet
Beta turn          UUUUU
Disordered termini
ARG rich          961   YLISLGIPKIDADTYVGSKIYSQDKYRILESYVYNLLSINYGCYQLFDFNSPDLKLRIRI 1020
Beta sheet
Beta turn          UUUUU
Disordered termini
ARG rich          1021  RRRRRRRRRRRRRRRRRRRRR
PFK GKIPAVTFILHL YAKLEVINYAIKNGSWISLFCNYPKSEM IKLWKKMWNITSLRSPY 1080
Beta sheet
Beta turn
Disordered termini
ARG rich          1081  D
TNANFFQD 1088

Capsid (VP2) | P22055 [70 - 341]
Beta sheet
Beta turn
Disordered termini
ARG rich          1   DDDDDDDDDDDDDDDDDDDDDDDDDDDDDDDDDDDDDDDDDDDDDDDDDDDDDDDDDDDDDDD
RRRRRRRRRRRRRRRRRRRRRRRRRRRRRRRRRRRRRRRRRRRRRRRRRRRRRRRRRRRRRR   RRR
MAYRKR GARRET NLK QDERM QEKEDSKN INN DSPKS QLSEK VLSKKEE IITDN QEEVKIS 60
Beta sheet
Beta turn          UU
Disordered termini
ARG rich          61   RRRRRRRRRRRRRRRRRRRRRRRRRRRRRRRRRRRRRRRRRRRRRRRRRRRRRRRRRRRRRRR
DEVKKS NKEESK QLLEVLKTK EEHQEV QYE I LQKT I PTFEPKESILKKLEDIKPEQAKK 120
Beta sheet
Beta turn          UUUUUU
Disordered termini
ARG rich          121  RRRRRRRRRRRRRRRRRRRRRRRRRRRRRRRRRRRRRRRRRRRRRRRRRRRRRRRRRRRRRRR
QTKLFRIFEPKQLPIYRANGERELRNRWYWKLRD TLPDGDYDVREYFLNLYDQVLMEMP 180
Beta sheet
Beta turn          UUUUUUUU
Disordered termini
ARG rich          181  RRRRRRRRRRRRRRRRRRRRRRRRRRRRRRRRRRRRRRRRRRRRRRRRRRRRRRRRRRRRRRR
DYLL LKDMAVENKNSRDAGKVVDSETAAICDAIFQDEETEGAVRRFIAEMRQRVQADRNV 240
Beta sheet

```



|                                                           |     |                                                                                             |     |
|-----------------------------------------------------------|-----|---------------------------------------------------------------------------------------------|-----|
| Beta turn<br>Disordered termini<br>ARG rich               | 241 | VNYPSILHPIDHAFNEYFLQHQLVEPLNNDIIFNYIPERIRNDVNYILNMDRNL PSTARY                               | 300 |
| Beta sheet<br>Beta turn<br>Disordered termini<br>ARG rich | 301 | IRPNLLQDRNLNLHDFESLWDITITTSNYILARSVVPDLKELVSTEAQIQKMSQDLQLEAL                               | 360 |
| Beta sheet<br>Beta turn<br>Disordered termini<br>ARG rich | 361 | TIQSETQFLTGINSAANDCFKTLIAAMLSQRTMSLDFVTTNYMSLISGMWLLTVIPNDM                                 | 420 |
| Beta sheet<br>Beta turn<br>Disordered termini<br>ARG rich | 421 | FIRESLVACQLAIINTIVYPAFGMQRMHYRNGDPQTPFQIAEQQIQNFQVANWLHFVNYN                                | 480 |
| Beta sheet<br>Beta turn<br>Disordered termini<br>ARG rich | 481 | QFRQVVIDGVNLNQLNDNIRNGHVVNQLMEALMQLSRQQFPTMPVDYKR SIQRGILLLSN                               | 540 |
| Beta sheet<br>Beta turn<br>Disordered termini<br>ARG rich | 541 | RLGQLVDLTRLLSYNYETLMACITMNMQH VQTLTTEKLQLTSVTSLCMLIGNATVIPSPQ                               | 600 |
| Beta sheet<br>Beta turn<br>Disordered termini<br>ARG rich | 601 | TLFHYYNVNVNFHSNYNERINDAVAIIT AANRLNLYQKKMKSIVEDFLKRLQIFDVARVP                               | 660 |
| Beta sheet<br>Beta turn<br>Disordered termini<br>ARG rich | 661 | RRRRRRRRRRRRRRRRRRRRRRRRRRRR<br>DDQMYRLRDLRLLLPVEIRLDDIFNLIAMNEQIERASDKIAQGVIIAYRDMQLERDEMY | 720 |
| Beta sheet<br>Beta turn<br>Disordered termini<br>ARG rich | 721 | GYVNIARNLDGFQQINLEELMRSGDYAQITNMLLNQPVALV GALPFITDSSVISLIAKL                                | 780 |
| Beta sheet<br>Beta turn<br>Disordered termini<br>ARG rich | 781 | UUUU<br>RRRRRRRRRRRRRRR<br>DATVFAQIVKLRKVDTLKPILYKINS DSNDFYLVANYDWIPTSTTKVYKQVPQQDFFRAS    | 840 |
| Beta sheet<br>Beta turn<br>Disordered termini<br>ARG rich | 841 | MHMLTSNLFTTVYSDLLAFVSADTVEPINA VAFDNMRIMNEL                                                 | 882 |

Capsid (VP3) | P22055 [342 - 581]

|                                                           |     |                                                                                |     |
|-----------------------------------------------------------|-----|--------------------------------------------------------------------------------|-----|
| Beta sheet<br>Beta turn<br>Disordered termini<br>ARG rich | 1   | MKVLALRHSVAQVYADTQVYVHDDTKDSYENAF LISNLTTHNILYLNYSIKTLEILNKSG                  | 60  |
| Beta sheet<br>Beta turn<br>Disordered termini<br>ARG rich | 61  | UUUUUUUUU<br>IAAIALQSLEELFTLIRCNFTYDYELDI IYLHDYSYYTNEIRTDQHWITKTNIEEYLLP      | 120 |
| Beta sheet<br>Beta turn<br>Disordered termini<br>ARG rich | 121 | SSSSSSSSSSSSS<br>GWKLYVGYNGSETRGHYNFSFKCQNAATDDDL IIEYIYSEALDFQNFM LKKIKERMTTS | 180 |



121 IFGIQEQLTVSNTSQDQWKFDVVKTTANGSIGQYGPLLSSPKLYAVMKHNEKLYTYEQ 180  
 Beta sheet  
 Beta turn  
 Disordered termini  
 ARG rich  
 181 TPNARTAHYSTTNYDSVNMTAFCDFYIIPRSEESKCTEYINNGLPPIQONTRNVVPLSLTA 240  
 Beta sheet  
 Beta turn  
 Disordered termini  
 ARG rich  
 241 RDVIHYRAQANEDIVISKTSLWKEMQYNRDITIRFKFANTIIKSGGLGYKWSEISFKPAN 300  
 Beta sheet  
 Beta turn  
 Disordered termini  
 ARG rich  
 301 YQYTYTRDGEVTAHTTCSVNGVNDVDFNNGGYLPTDFVSKFEVIKENSIVYIDYWDSSQ 360  
 Beta sheet  
 Beta turn  
 Disordered termini  
 ARG rich  
 361 AFRNVVYVRS LANLNSVMCTGGSYNFSLPVGQWPVLTGGAVSLHSAGVTLSTQFTDFVS 420  
 Beta sheet  
 Beta turn  
 Disordered termini  
 ARG rich  
 421 LNLSLRFRLAVEEPHFKLTRRLDRLYGLPAADPNNGKEYEYIAGRFLISLIVPSNDDY 480  
 Beta sheet  
 Beta turn  
 Disordered termini  
 ARG rich  
 481 QTPIANSVTVRQDLERQLGELREEFNALSQEIAMSQLIDLALLPLDMFSMFSGIKSTIDA 540  
 Beta sheet  
 Beta turn  
 Disordered termini  
 ARG rich  
 541 AKSMATNVMKKFKKSGLANSVSTLTDSLDAASSISRGSSIRSISGSSASAWTDVSTQITD 600  
 Beta sheet  
 Beta turn  
 Disordered termini  
 ARG rich  
 601 ISSSVSSVSTQTSTISRRLRLKEMATQTEGMNFDDISAAVLKTKIDKSTQISPNTIPDIV 660  
 Beta sheet  
 Beta turn  
 Disordered termini  
 ARG rich  
 661 TEASEKFIPNRAYRVINDDVFEAGIDGKFFAYKVDTFEEIPFDVQKFADLVTDSPVISA 720  
 Beta sheet  
 Beta turn  
 Disordered termini  
 ARG rich  
 721 IIDFKTLKNLNDNYGITKQQAFLNLLRSDPRVLRREFINQDNPIIRNRIEQLIMQCRL 776

Intermediate capsid protein VP6 (VP6) | A2T3S5

Beta sheet  
 Beta turn  
 Disordered termini  
 ARG rich  
 1 MDVLYSLSKTLKDARDKIVEGTLVSNVSDLIQQFNQMIITMNGNEFQGGIGNLPIRNWN 60  
 Beta sheet  
 Beta turn  
 Disordered termini  
 ARG rich  
 61 FNFGLLGTLLNLDANYVETARNTIDYFVDFVDNVCMDVMRESQRNGIAPQSDSLRKL 120  
 Beta sheet  
 Beta turn  
 Disordered termini  
 ARG rich  
 121 AIKFKRINF DNSSEYIENWNLQNRRTGFTFHKPNIFPYSASFTLNSQPAHDNLMGTM 180  
 Beta sheet  
 Beta turn  
 Disordered termini

UU

ARG rich  
 181 WLNAGSEIQVAGFDYSCAINAPANIQQFEHIVPLRRVLTATITLLPDAERFSFPRVINS 240  
 Beta sheet SSSSSSSSSSSSSSSSS  
 Beta turn  
 Disordered termini  
 ARG rich  
 241 ADGATTWFFNPVILRPNNVEVEFLLNGQIINTYQARFGTIVARNFDTIRLSFQLMRPPNM 300  
 Beta sheet SSSSSSSSSSSSSSSSSSS  
 Beta turn  
 Disordered termini  
 ARG rich  
 301 TPAVAVLFPNAQPFHEHATVGLTLRIESAVCESVLADASETLLANVTSVRQEYAIIPVGPV 360  
 Beta sheet  
 Beta turn  
 Disordered termini  
 ARG rich  
 361 FPPGMNWTDLITNYSPSREDNLQRVFTVASIRSMLIK 397

Outer capsid glycoprotein VP7 (VP7) | A2T3P5

Beta sheet  
 Beta turn  
 Disordered termini DD  
 ARG rich  
 1 MYGIEYTTVLTFLLISIIILLNYILKSLTRIMDFIIYRFLFIIVILSPFLRAQNYGINLPIT 60  
 Beta sheet  
 Beta turn  
 Disordered termini  
 ARG rich  
 61 GSMDTAYANSTQEETFLTSTLCLYYPTEAATEINDNSWKDTLSQLFLTGWPTGVSFYFKE 120  
 Beta sheet  
 Beta turn  
 Disordered termini  
 ARG rich  
 121 YTNIASFSVDPQLYCDYNVLMKYDATIQLDMSELADLILNEWLCNPMIDITLYYYQQTDE 180  
 Beta sheet SSSSSSSSS  
 Beta turn  
 Disordered termini  
 ARG rich  
 181 ANKWISMGSSCTIKVCPLNTQTLGIGCLTTDATTFFEEVATAEKLVIDVVDGVNHKLDVT 240  
 Beta sheet SSSSSSSSS  
 Beta turn  
 Disordered termini  
 ARG rich  
 241 TATCTIRNCKKLGPRENVAVIQVGGSDILDITADPTTAPQTERMMRINWKKWWQVFYTVV 300  
 Beta sheet  
 Beta turn  
 Disordered termini  
 ARG rich  
 301 DYVDQIIQVMSKRSRSLNSAAFYRV 326

Tobacco mosaic virus (Vulgare)  
 Capsid (CP) | P03601

Beta sheet  
 Beta turn  
 Disordered termini D  
 ARG rich  
 1 MSYSITTPSQFVFLSSAWADPIELINLCTNALGNQFQTQQARTVVQRQFSEVWKPSQVT 60  
 Beta sheet  
 Beta turn UUU  
 Disordered termini  
 ARG rich  
 61 VRFPSDFKVYRYNAVLDPVLTALLGAFDTRNRIIEVENQANPTTAETLDATRRVDDATV 120  
 Beta sheet  
 Beta turn  
 Disordered termini D  
 ARG rich  
 121 AIRSAINNLIVELIRGTGSYNRSSFESSSGLVWTS GPAT 159

Turnip yellow mosaic virus

Capsid (CP) | P03601

Beta sheet

Beta turn

Disordered termini DDDDDDD

ARG rich

1 MEIDKELAPQDRTVTVATVLPVAVPGPSPLTIKQPFQSEVLFAGTKDAEASLTIANIDSVS 60

Beta sheet SSSSSSSSSSSS

Beta turn UU

Disordered termini

ARG rich

61 TLTFYRHASLES LWVTIHPTLQAPTFPTTVGVCWVPANSPVTPAQITKTYGGQIFCIGG 120

Beta sheet SSSSSSSSSSSS

Beta turn

Disordered termini

ARG rich

121 AINTLSPLIVKCPLEMMNPRVKDSIQYLDSPKLLISITAQPTAPPASTCIITVSGTLSMH 180

Beta sheet S

Beta turn

Disordered termini D

ARG rich

181 SPLITDTST 189
